# Supplementary material for: Ambient and aerobic carbon–carbon bond cleavage toward α-ketoester synthesis by transition-metal-free photocatalysis
Source: Royal Society of Chemistry journal article supplement (doi:10.1039/c9gc01357a), 2019-01-01

# Ambient and aerobic carbon-carbon bond cleavage toward $\alpha$ - ketoester synthesis by transition-metal-free photocatalysis

Qing Yu,<sup>a</sup> Yating Zhang,<sup>a</sup> Jie-Ping Wan<sup>\*a</sup>

<sup>a</sup>Collge of Chemistry and Chemical Engineering, Jiangxi Normal University,  
Nanchang 330022, P. R. China

Email: [wanjieping@jxnu.edu.cn](mailto:wanjieping@jxnu.edu.cn)

## Contents

|                                                                                      |         |
|--------------------------------------------------------------------------------------|---------|
| General experimental information.....                                                | S2      |
| The ESI-HRMS spectra of the <sup>18</sup> O-labeled product <b>3al</b> .....         | S2      |
| The fluorescence quenching experiments.....                                          | S3-S4   |
| General procedure for the synthesis of of $\alpha$ -ketoesters <b>3</b> .....        | S4-S5   |
| General procedure for the synthesis of quinoxalin-2(1 <i>H</i> )-ones <b>5</b> ..... | S5      |
| Characterization data of all products.....                                           | S5-S17  |
| References.....                                                                      | S18     |
| <sup>1</sup> H and <sup>13</sup> C NMR spectra of all products.....                  | S19-S64 |

## General experimental information

All experiments were carried out under air atmosphere. The enaminones **1** were synthesized following literature process,<sup>1-2</sup> all other chemicals used in the experiments were obtained from commercial sources and used directly without further treatment. <sup>1</sup>H and <sup>13</sup>C NMR spectra were recorded in 400 MHz apparatus in CDCl<sub>3</sub>. The frequencies for <sup>1</sup>H NMR and <sup>13</sup>C NMR test are 400 MHz and 100 MHz, respectively. The chemical shifts were reported in ppm with TMS as internal standard. Melting points were tested in X-4A instrument without correcting temperature and the HRMS data for all new products were obtained under ESI model with TOF analyzer.

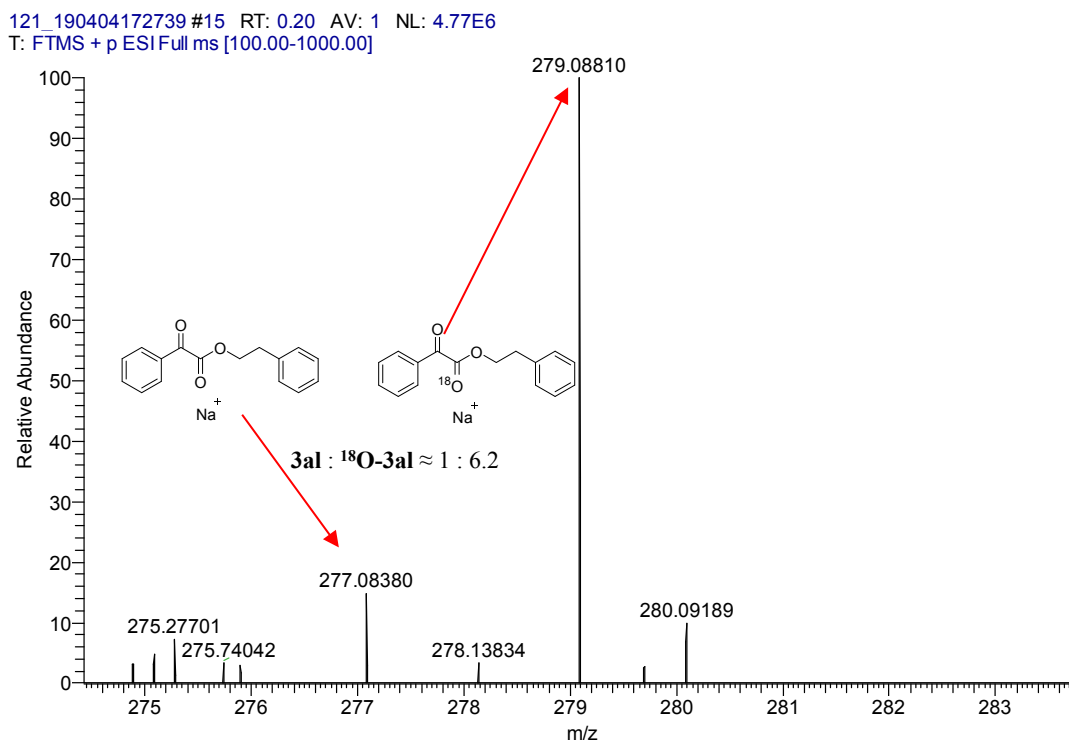

Figure S1 The ESI-HRMS spectra of the <sup>18</sup>O-labeled product **3al**

**The fluorescence quenching experiments of RB with enaminone 1a.** The fluorescence quenching experiments were recorded in a Hitachi F-7000 fluorescence spectrophotometer. The excitation wavelength and emission wavelength were fixed at 527 nm and 537 nm, respectively. In the blank experiment, RB solution of EtOH was recorded in the concentration of  $1 \times 10^{-3}$  mol/L. Subsequently, different amounts of enaminone **1a** was solved in the solution, and the resulting changes in fluorescence intensity in the **1a** concentration of  $2 \times 10^{-2}$  mol/L,  $4 \times 10^{-2}$  mol/L,  $6 \times 10^{-2}$  mol/L,  $8 \times 10^{-2}$  mol/L,  $10 \times 10^{-2}$  mol/L,  $12 \times 10^{-2}$  mol/L were collected in Figure S2. According to the results as well as the corresponding Stern-Volmer plots (Figure S3), the enaminone **1a** did not show quenching effect to the fluorescence intensity of RB, which indicated that enaminone **1** was not the energy acceptor of the excited RB in the titled reaction.

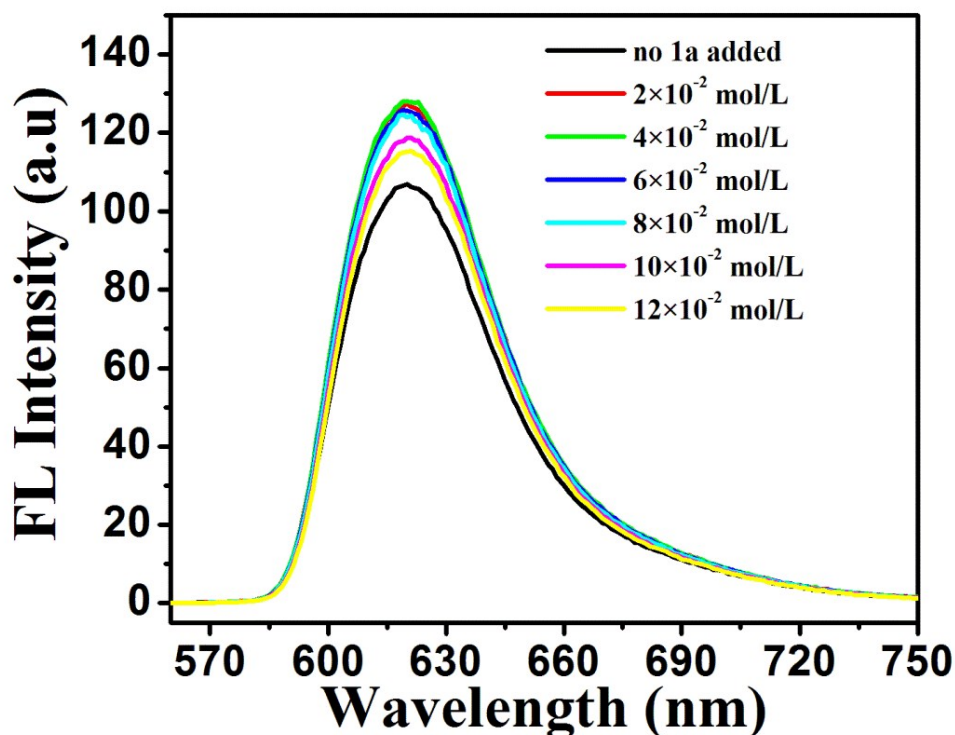

**Figure S2** The quenching of RB fluorescence emission with enaminone **1a**

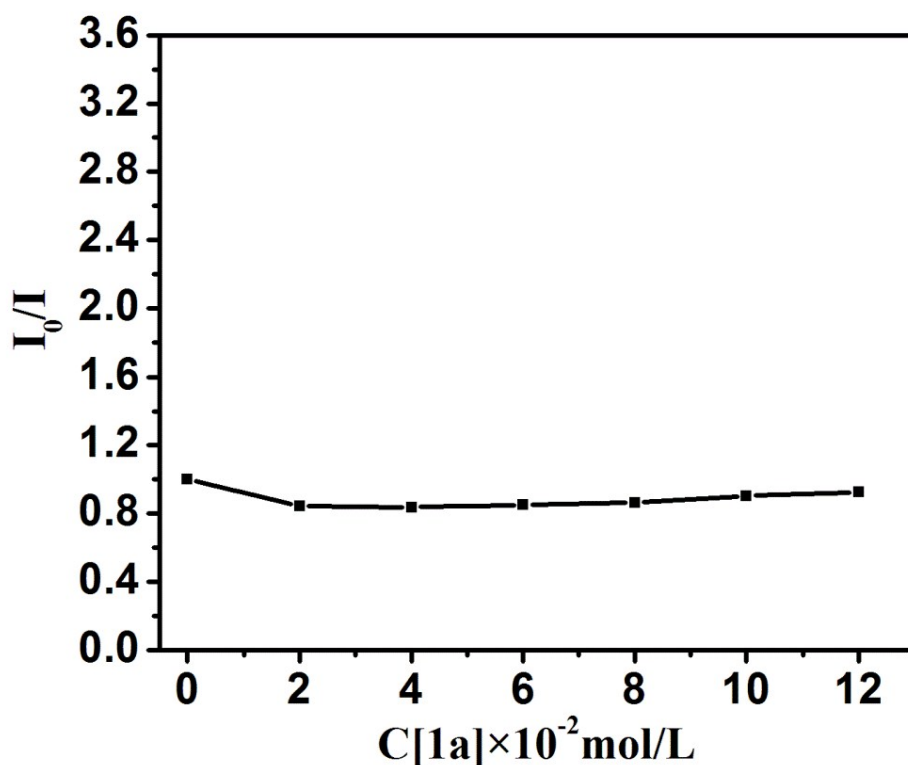

**Figure S3** the Stern-Volmer plot.  $I_0$  is the inherent fluorescence intensity of RB.  $I$  is the fluorescence intensity of RB in the presence of **1a**

**General procedure for the synthesis of  $\alpha$ -ketoesters **3**.** In a 15 mL test tube were charged with enaminone **1** (0.2 mmol), RB (0.002 mmol), AcOH (0.4 mmol), alcohol **2** (1 mL, or 1 mmol solid alcohol substrate and 1 mL DMF) and 4Å molecular sieve (80 mg). The mixture was irradiation with 20 W green LEDs for 24h at room temperature. Upon completion (TLC), the mixture was moved to the round bottom flask, and the reaction tube was washed additionally with ethyl acetate (5mL) to fully transfer the residue. The solvent in the flask was then removed at reduced pressure, and the residue was purified by silica gel column chromatography with the elution of mixed ethyl acetate and petroleum ether (v/v = 1:20-1:3). For the reaction of solid alcohols, after the reaction completion, water (5 mL) was added to the vessel, and the suspension was extracted with ethyl acetate ( $3 \times 10$  mL). The combined organic phase

was dried over  $\text{Na}_2\text{SO}_4$ . After filtering, the acquired solution was employed to reduced pressure to remove the organic solvent. And analogous chromatographic purification using mixed ethyl acetate and petroleum (v/v = 1:8) as eluent was executed to obtain corresponding products.

**General procedure for the synthesis of quinoxalin-2(1*H*)-ones 5.** In a 15 mL test tube were charged with enaminone 1 (0.2 mmol), RB (0.002 mmol), AcOH (0.4 mmol), alcohol 2 (1 mL, or 1 mmol solid alcohol substrate and 1 mL DMF) and 4Å molecular sieve (80 mg). The mixture was irradiation with 20 W green LEDs for 24h at room temperature. Subsequently, diamine 4 (0.2 mmol) solved in EtOH (1 mL) was added, and the resulting mixture was further stirred at room temperature for 12 h. Upon completion (TLC), the mixture was moved to the round bottom flask, and the reaction tube was washed additionally with ethyl acetate (5mL) to fully transfer the residue. The solvent in the flask was then removed at reduced pressure, and the residue was purified by silica gel column chromatography with the elution of mixed ethyl acetate and petroleum ether (v/v = 1:5).

#### Characterization data of all products

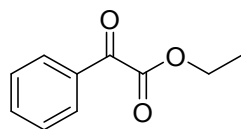

**Ethyl 2-oxo-2-phenylacetate (3a)**<sup>3</sup> Colorless liquid;  $^1\text{H}$  NMR (400 MHz,  $\text{CDCl}_3$ ):  $\delta$  8.04-8.00 (m, 2 H), 7.66 (t,  $J = 7.4$  Hz, 1 H), 7.52 (t,  $J = 7.8$  Hz, 2 H), 4.46 (q,  $J = 7.0$  Hz, 2 H), 1.43 (t,  $J = 7.0$  Hz, 3 H);  $^{13}\text{C}$  NMR (100 MHz,  $\text{CDCl}_3$ ):  $\delta$  186.4, 163.8, 134.9, 132.5, 130.0, 128.9, 62.3, 14.1.

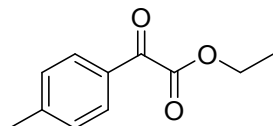

**Ethyl 2-oxo-2-(p-tolyl)acetate (3b)**<sup>4</sup> Colorless liquid; <sup>1</sup>H NMR (400 MHz, CDCl<sub>3</sub>): δ 7.90 (d, *J* = 8.2 Hz, 2 H), 7.30 (d, *J* = 8.0 Hz, 2 H), 4.44 (q, *J* = 7.0 Hz, 2 H), 2.43 (s, 3 H), 1.42 (t, *J* = 7.2 Hz, 3 H); <sup>13</sup>C NMR (100 MHz, CDCl<sub>3</sub>): δ 186.1, 164.0, 146.2, 130.1, 129.6, 129.0, 62.2, 21.9, 14.1.

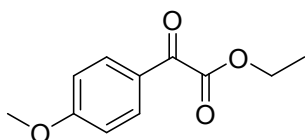

**Ethyl 2-(4-methoxyphenyl)-2-oxoacetate (3c)**<sup>4</sup> Colorless liquid; <sup>1</sup>H NMR (400 MHz, CDCl<sub>3</sub>): δ 8.00 (d, *J* = 8.0 Hz, 2 H), 6.97 (d, *J* = 8.0 Hz, 2 H), 4.43 (q, *J* = 7.0 Hz, 2 H), 3.89 (s, 3 H), 1.42 (t, *J* = 7.0 Hz, 3 H); <sup>13</sup>C NMR (100 MHz, CDCl<sub>3</sub>): δ 184.9, 165.0, 164.2, 132.5, 125.5, 114.2, 62.1, 55.6, 14.1.

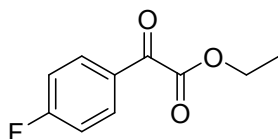

**Ethyl 2-(4-fluorophenyl)-2-oxoacetate (3d)**<sup>3</sup> Colorless liquid; <sup>1</sup>H NMR (400 MHz, CDCl<sub>3</sub>): δ 8.16-7.99 (m, 2 H), 7.24-7.12 (m, 2 H), 4.45 (q, *J* = 7.2 Hz, 2 H), 1.43 (t, *J* = 7.2 Hz, 3 H); <sup>13</sup>C NMR (100 MHz, CDCl<sub>3</sub>): δ 184.5, 166.9 (d, <sup>1</sup>*J*<sub>C-F</sub> = 257 Hz), 163.4, 133.0, 132.9, 129.7 (d, <sup>4</sup>*J*<sub>C-F</sub> = 3 Hz), 116.2 (d, <sup>2</sup>*J*<sub>C-F</sub> = 22 Hz), 62.4, 14.1.

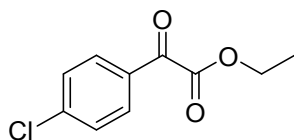

**Ethyl 2-(4-chlorophenyl)-2-oxoacetate (3e)**<sup>4</sup> Colorless liquid; <sup>1</sup>H NMR (400 MHz, CDCl<sub>3</sub>): δ 7.98 (d, *J* = 8.6 Hz, 2 H), 7.49 (d, *J* = 8.6 Hz, 2 H), 4.45 (q, *J* = 7.0 Hz, 2 H), 1.42 (t, *J* = 7.0 Hz, 3 H); <sup>13</sup>C NMR (100 MHz, CDCl<sub>3</sub>): δ 184.9, 163.2, 141.6, 131.4, 134.0, 129.3, 62.5, 14.1.

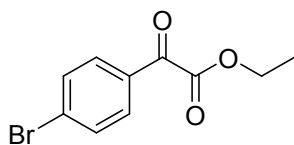

**Ethyl 2-(4-bromophenyl)-2-oxoacetate (3f)**<sup>5</sup> Colorless liquid; <sup>1</sup>H NMR (400 MHz, CDCl<sub>3</sub>): δ 7.90 (d, *J* = 8.6 Hz, 2 H), 7.66 (d, *J* = 8.6 Hz, 2 H), 4.45 (q, *J* = 7.0 Hz, 2 H), 1.42 (t, *J* = 7.0 Hz, 3 H); <sup>13</sup>C NMR (100 MHz, CDCl<sub>3</sub>): δ 185.1, 163.2, 132.3, 131.4, 131.4, 130.5, 62.5, 14.1.

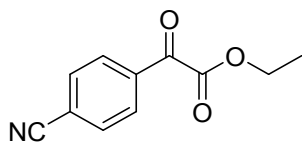

**Ethyl 2-(4-cyanophenyl)-2-oxoacetate (3g)**<sup>6</sup> Colorless liquid; <sup>1</sup>H NMR (400 MHz, CDCl<sub>3</sub>): δ 8.16 (d, *J* = 8.0 Hz, 2 H), 7.82 (d, *J* = 8.0 Hz, 2 H), 4.47 (q, *J* = 7.0 Hz, 2 H), 1.44 (t, *J* = 7.0 Hz, 3 H); <sup>13</sup>C NMR (100 MHz, CDCl<sub>3</sub>): δ 184.4, 162.4, 135.6, 132.6, 130.4, 117.9, 117.5, 62.9, 14.1.

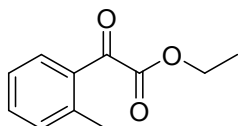

**Ethyl 2-oxo-2-(o-tolyl)acetate (3h)**<sup>3</sup> Colorless liquid; <sup>1</sup>H NMR (400 MHz, CDCl<sub>3</sub>): δ 7.69 (d, *J* = 7.8 Hz, 1 H), 7.51-7.46 (m, 1 H), 7.31 (t, *J* = 8.0 Hz, 2 H), 4.43 (q, *J* = 7.0 Hz, 2 H), 2.61 (s, 3 H), 1.41 (t, *J* = 7.0 Hz, 3 H); <sup>13</sup>C NMR (100 MHz, CDCl<sub>3</sub>): δ 188.8, 164.6, 141.3, 133.6, 132.3, 132.2, 131.3, 125.9, 62.2, 21.4, 14.1.

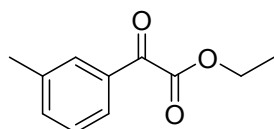

**Ethyl 2-oxo-2-(m-tolyl)acetate (3i)**<sup>7</sup> Colorless liquid; <sup>1</sup>H NMR (400 MHz, CDCl<sub>3</sub>): δ 7.80 (d, *J* = 7.2 Hz, 2 H), 7.46 (d, *J* = 7.4 Hz, 1 H), 7.39 (t, *J* = 7.8 Hz, 1 H), 4.45 (q, *J* = 7.0 Hz, 2 H), 2.42 (s, 3 H), 1.42 (t, *J* = 7.0 Hz, 3 H); <sup>13</sup>C NMR (100 MHz, CDCl<sub>3</sub>): δ 186.6, 164.0, 138.8, 135.7, 132.5, 130.3, 128.8, 127.3, 62.2, 21.2, 14.1.

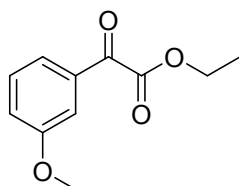

**Ethyl 2-(3-methoxyphenyl)-2-oxoacetate (3j)**<sup>8</sup> Colorless liquid; <sup>1</sup>H NMR (400 MHz, CDCl<sub>3</sub>): δ 7.59-7.52 (m, 2 H), 7.42 (t, *J* = 7.8 Hz, 1 H), 7.20 (dd, *J* = 8.2, 2.2 Hz, 1 H),

4.45 (q,  $J = 7.0$  Hz, 2 H), 3.86 (s, 3 H), 1.43 (t,  $J = 7.0$  Hz, 3 H);  $^{13}\text{C}$  NMR (100 MHz,  $\text{CDCl}_3$ ):  $\delta$  186.3, 163.9, 156.0, 133.7, 129.9, 123.1, 121.8, 113.3, 62.3, 55.5, 14.1.

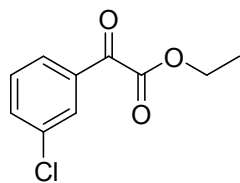

**Ethyl 2-(3-chlorophenyl)-2-oxoacetate (3k)**<sup>8</sup> Colorless liquid;  $^1\text{H}$  NMR (400 MHz,  $\text{CDCl}_3$ ):  $\delta$  7.94 (s, 1 H), 7.84 (d,  $J = 7.8$  Hz, 1 H), 7.58-7.52 (m, 1 H), 7.39 (t,  $J = 7.8$  Hz, 1 H), 4.38 (q,  $J = 7.0$  Hz, 2 H), 1.36 (t,  $J = 7.0$  Hz, 3 H).  $^{13}\text{C}$  NMR (100 MHz,  $\text{CDCl}_3$ ):  $\delta$  184.8, 163.0, 135.2, 134.8, 134.1, 130.2, 129.9, 128.2, 62.6, 14.1.

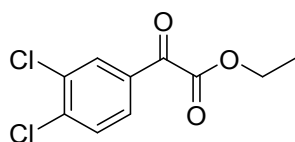

**Ethyl 2-(3,4-dichlorophenyl)-2-oxoacetate (3l)**<sup>9</sup> Colorless liquid;  $^1\text{H}$  NMR (400 MHz,  $\text{CDCl}_3$ ):  $\delta$  8.15 (s, 1 H), 7.89 (dd,  $J = 8.2, 1.6$  Hz, 1 H), 7.60 (d,  $J = 8.4$  Hz, 1 H), 4.46 (q,  $J = 7.0$  Hz, 2 H), 1.43 (t,  $J = 7.0$  Hz, 3 H);  $^{13}\text{C}$  NMR (100 MHz,  $\text{CDCl}_3$ ):  $\delta$  183.6, 162.5, 139.7, 133.7, 132.2, 131.8, 131.0, 129.0, 62.8, 14.1.

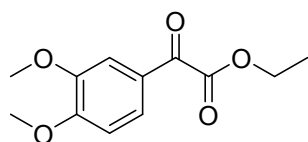

**Ethyl 2-(3,4-dimethoxyphenyl)-2-oxoacetate (3m)**<sup>4</sup> Colorless liquid;  $^1\text{H}$  NMR (400 MHz,  $\text{CDCl}_3$ ):  $\delta$  7.64 (dd, 1 H), 7.56 (d,  $J = 1.8$  Hz, 1 H), 6.93 (d,  $J = 8.4$  Hz, 1 H), 4.44 (q,  $J = 7.0$  Hz, 2 H), 3.96 (s, 6 H), 1.42 (t,  $J = 7.0$  Hz, 3 H);  $^{13}\text{C}$  NMR (100 MHz,  $\text{CDCl}_3$ ):  $\delta$  185.0, 164.1, 155.0, 149.4, 126.2, 125.6, 110.8, 110.3, 62.1, 56.2, 56.1, 14.1.

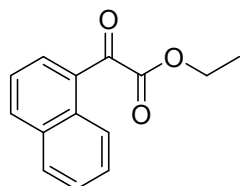

**Ethyl 2-(naphthalen-1-yl)-2-oxoacetate (3n)** Colorless liquid;  $^1\text{H}$  NMR (400 MHz,  $\text{CDCl}_3$ ):  $\delta$  9.04 (d,  $J = 8.6$  Hz, 1 H), 8.10 (d,  $J = 8.2$  Hz, 1 H), 7.98 (dd, 1 H), 7.90 (d,  $J = 8.0$  Hz, 1 H), 7.70-7.66 (m, 1 H), 7.60-7.52 (m, 2 H), 4.48 (q,  $J = 7.0$  Hz, 2 H),



1.43 (t,  $J = 7.0$  Hz, 3 H);  $^{13}\text{C}$  NMR (100 MHz,  $\text{CDCl}_3$ ):  $\delta$  188.9, 164.6, 135.8, 134.0, 133.9, 131.0, 129.3, 128.8, 128.3, 127.0, 125.6, 124.3, 62.4, 14.1; ESI-HRMS Calcd for  $\text{C}_{14}\text{H}_{12}\text{O}_3\text{Na}$   $[\text{M}+\text{Na}]^+$  251.06787, found 251.06723.

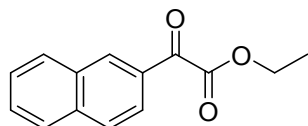

**Ethyl 2-(naphthalen-2-yl)-2-oxoacetate (3o)**<sup>3</sup> Colorless liquid;  $^1\text{H}$  NMR (400 MHz,  $\text{CDCl}_3$ ):  $\delta$  8.55 (s, 1 H), 8.04 (dd,  $J = 8.6, 1.6$  Hz, 1 H), 7.96 (d,  $J = 8.2$  Hz, 1 H), 7.89 (dd,  $J = 15.6, 8.4$  Hz, 2 H), 7.66-7.61 (m, 1 H), 7.59-7.54 (m, 1 H), 4.51 (q,  $J = 7.0$  Hz, 2 H), 1.45 (t,  $J = 7.2$  Hz, 3 H);  $^{13}\text{C}$  NMR (100 MHz,  $\text{CDCl}_3$ ):  $\delta$  186.3, 163.9, 136.4, 133.4, 132.3, 123.0, 129.9, 129.5, 128.9, 127.9, 127.2, 124.0, 62.4, 14.2.

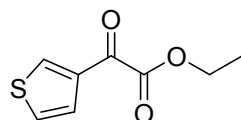

**Ethyl 2-oxo-2-(thiophen-3-yl)acetate (3p)**<sup>10</sup> Colorless liquid;  $^1\text{H}$  NMR (400 MHz,  $\text{CDCl}_3$ ):  $\delta$  8.54 (s, 1 H), 7.69 (d,  $J = 5.0$  Hz, 1 H), 7.38-7.34 (m, 1 H), 4.42 (q,  $J = 7.0$  Hz, 2 H), 1.42 (t,  $J = 7.0$  Hz, 3 H);  $^{13}\text{C}$  NMR (100 MHz,  $\text{CDCl}_3$ ):  $\delta$  178.2, 162.4, 137.6, 127.9, 126.6, 62.5, 14.1.

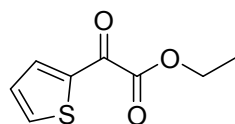

**Ethyl 2-oxo-2-(thiophen-2-yl)acetate (3q)**<sup>4</sup> Colorless liquid;  $^1\text{H}$  NMR (400 MHz,  $\text{CDCl}_3$ ):  $\delta$  8.13 (dd,  $J = 3.8, 1.0$  Hz, 1 H), 7.83 (dd,  $J = 4.8, 1.0$  Hz, 1 H), 7.22-7.17 (m, 1 H), 4.44 (q,  $J = 7.0$  Hz, 2 H), 1.43 (t,  $J = 7.2$  Hz, 3 H);  $^{13}\text{C}$  NMR (100 MHz,  $\text{CDCl}_3$ ):  $\delta$  176.4, 161.7, 139.1, 137.4, 137.2, 128.6, 62.7, 14.0.

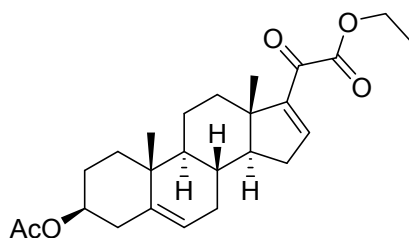

**Ethyl 2-((3S,8R,9S,10R,13S,14S)-3-Acetoxy-10,13-dimethyl-2,3,4,7,8,9,10,11,12,13,14,15-dodecahydro-1H-cyclopenta[a]phenanthren-17-yl)-**

**2-oxoacetate (3r)** White solid; mp 143-144 °C; <sup>1</sup>H NMR (400 MHz, CDCl<sub>3</sub>): δ 7.13-7.10 (m, 1 H), 5.39 (d, *J* = 5.0 Hz, 1 H), 4.61 (tt, *J* = 10.4, 5.2 Hz, 1 H), 4.33 (q, *J* = 7.0 Hz, 2 H), 2.47-2.39 (m, 2 H), 2.36-2.31 (m, 2 H), 2.17-2.10 (m, 1 H), 2.04 (s, 3 H), 1.89-1.84 (m, 2 H), 1.72-1.48 (m, 8 H), 1.36 (q, *J* = 6.6, 6.0 Hz, 4 H), 1.19-1.14 (m, 1 H), 1.07 (s, 3 H), 0.97 (s, 3 H); <sup>13</sup>C NMR (100 MHz, CDCl<sub>3</sub>): δ 183.7, 170.5, 163.1, 152.7, 151.0, 140.3, 121.9, 73.8, 62.0, 56.0, 50.4, 46.5, 38.1, 36.9, 36.8, 34.1, 33.3, 31.5, 30.1, 27.7, 21.4, 20.6, 19.2, 15.6, 14.1; ESI-HRMS Calcd for C<sub>25</sub>H<sub>34</sub>O<sub>5</sub>Na [M+Na]<sup>+</sup> 437.22985, found 437.22942.

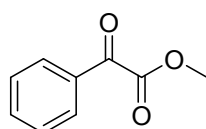

**Methyl 2-oxo-2-phenylacetate (3ab)**<sup>11</sup> Colorless liquid; <sup>1</sup>H NMR (400 MHz, CDCl<sub>3</sub>): δ 8.04-8.00 (m, 2 H), 7.67 (t, *J* = 7.4 Hz, 1 H), 7.52 (t, *J* = 7.8 Hz, 2 H), 3.98 (s, 3 H); <sup>13</sup>C NMR (100 MHz, CDCl<sub>3</sub>): δ 186.0, 164.0, 135.0, 132.5, 130.1, 128.9, 52.7.

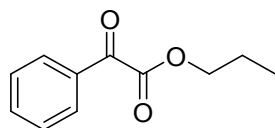

**Propyl 2-oxo-2-phenylacetate (3ac)**<sup>11</sup> Colorless liquid; <sup>1</sup>H NMR (400 MHz, CDCl<sub>3</sub>): δ 8.04-7.98 (m, 2 H), 7.66 (t, *J* = 7.4 Hz, 1 H), 7.52 (t, *J* = 7.8 Hz, 2 H), 4.36 (t, *J* = 6.6 Hz, 2 H), 1.81 (q, *J* = 7.0 Hz, 2 H), 1.02 (t, *J* = 7.4 Hz, 3 H); <sup>13</sup>C NMR (100 MHz, CDCl<sub>3</sub>): δ 186.5, 164.0, 134.8, 132.5, 123.0, 128.9, 67.7, 21.9, 10.3.

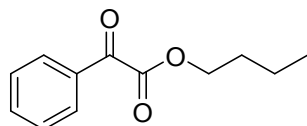

**Butyl 2-oxo-2-phenylacetate (3ad)**<sup>11</sup> Colorless liquid; <sup>1</sup>H NMR (400 MHz, CDCl<sub>3</sub>): δ 8.06-7.95 (m, 2 H), 7.66 (t, *J* = 7.4 Hz, 1 H), 7.51 (t, *J* = 7.8 Hz, 2 H), 4.40 (t, *J* = 6.6 Hz, 2 H), 1.80-1.73 (m, 2 H), 1.50-1.41 (m, 2 H), 0.97 (t, *J* = 7.4 Hz, 3 H); <sup>13</sup>C NMR (100 MHz, CDCl<sub>3</sub>): δ 186.5, 164.0, 134.9, 134.8, 132.5, 123.0, 128.9, 66.1, 30.5, 19.0, 13.6.

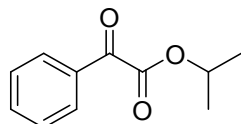

**Isopropyl 2-oxo-2-phenylacetate (3ae)**<sup>11</sup> Colorless liquid; <sup>1</sup>H NMR (400 MHz, CDCl<sub>3</sub>): δ 8.00 (d, *J* = 7.6 Hz, 2 H), 7.66 (t, *J* = 7.4 Hz, 1 H), 7.51 (t, *J* = 7.8 Hz, 2 H), 5.37-5.29 (m, 1 H), 1.42 (s, 6 H); <sup>13</sup>C NMR (100 MHz, CDCl<sub>3</sub>): δ 186.7, 163.6, 134.8, 132.6, 129.9, 128.9, 70.7, 21.7.

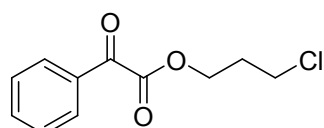

**3-Chloropropyl 2-oxo-2-phenylacetate (3af)**<sup>7</sup> Colorless liquid; <sup>1</sup>H NMR (400 MHz, CDCl<sub>3</sub>): δ 8.05-7.97 (m, 2 H), 7.70-7.65 (m, 1 H), 7.53 (t, *J* = 7.8 Hz, 2 H), 4.56 (t, *J* = 6.0 Hz, 2 H), 3.67 (t, *J* = 6.2 Hz, 2 H), 2.25 (p, *J* = 6.2 Hz, 2 H); <sup>13</sup>C NMR (100 MHz, CDCl<sub>3</sub>): δ 186.0, 163.6, 135.0, 132.4, 130.0, 129.0, 62.7, 40.8, 31.2.

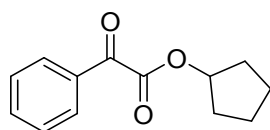

**Cyclopentyl 2-oxo-2-phenylacetate (3ag)**<sup>12</sup> Colorless liquid; <sup>1</sup>H NMR (400 MHz, CDCl<sub>3</sub>): δ 8.02-7.95 (m, 2 H), 7.68-7.63 (m, 1 H), 7.51 (t, *J* = 7.0 Hz, 2 H), 5.52-5.46 (m, 1 H), 2.03-1.97 (m, 2 H), 1.92-1.86 (m, 2 H), 1.82-1.75 (m, 2 H), 1.68-1.62 (m, 2 H); <sup>13</sup>C NMR (100 MHz, CDCl<sub>3</sub>): δ 186.7, 163.9, 134.8, 132.6, 129.9, 128.9, 79.7, 32.7, 23.7.

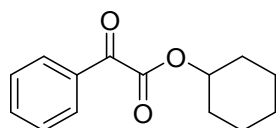

**Cyclohexyl 2-oxo-2-phenylacetate (3ah)**<sup>13</sup> Colorless liquid; <sup>1</sup>H NMR (400 MHz, CDCl<sub>3</sub>): δ 7.99 (d, *J* = 7.2 Hz, 2 H), 7.66 (t, *J* = 7.4 Hz, 1 H), 7.51 (t, *J* = 7.6 Hz, 2 H), 5.14-5.06 (m, 1 H), 2.04-1.98 (m, 2 H), 1.84-1.76 (m, 2 H), 1.61-1.57 (m, 3 H), 1.48-1.40 (m, 2 H), 1.33-1.28 (m, 1 H); <sup>13</sup>C NMR (100 MHz, CDCl<sub>3</sub>): δ 186.8, 163.7, 134.7, 132.6, 129.9, 128.9, 75.4, 31.5, 25.2, 23.6.

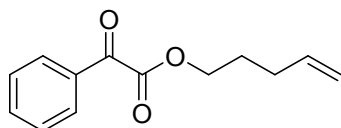

**Pent-4-en-1-yl 2-oxo-2-phenylacetate (3ai)** Colorless liquid;  $^1\text{H}$  NMR (400 MHz,  $\text{CDCl}_3$ ):  $\delta$  8.00 (d,  $J = 7.0$  Hz, 2 H), 7.66 (t,  $J = 7.2$  Hz, 1 H), 7.52 (t,  $J = 7.0$  Hz, 2 H), 5.90-5.72 (m, 1 H), 5.13-4.95 (m, 2 H), 4.40 (t,  $J = 5.6$  Hz, 2 H), 2.19 (d,  $J = 7.2$  Hz, 2 H), 1.95-1.81 (m, 2 H);  $^{13}\text{C}$  NMR (100 MHz,  $\text{CDCl}_3$ ):  $\delta$  186.4, 163.9, 136.9, 134.9, 132.5, 130.0, 128.9, 115.8, 65.6, 29.8, 27.6; ESI-HRMS Calcd for  $\text{C}_{13}\text{H}_{14}\text{O}_3\text{Na}$   $[\text{M}+\text{Na}]^+$  241.08352, found 241.08300.

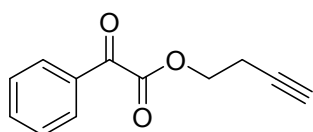

**But-3-yn-1-yl 2-oxo-2-phenylacetate (3aj)** Colorless liquid;  $^1\text{H}$  NMR (400 MHz,  $\text{CDCl}_3$ ):  $\delta$  8.07-8.00 (m, 2 H), 7.70-7.65 (m, 1 H), 7.52 (t,  $J = 7.6$  Hz, 2 H), 4.51 (t,  $J = 6.8$  Hz, 2 H), 2.70 (td,  $J = 6.8, 2.6$  Hz, 2 H), 2.06 (t,  $J = 2.6$  Hz, 1 H);  $^{13}\text{C}$  NMR (100 MHz,  $\text{CDCl}_3$ ):  $\delta$  185.9, 163.4, 135.0, 132.4, 130.1, 128.9, 79.2, 70.6, 63.6, 18.9; ESI-HRMS Calcd for  $\text{C}_{12}\text{H}_{10}\text{O}_3\text{Na}$   $[\text{M}+\text{Na}]^+$  225.05222, found 225.05182.

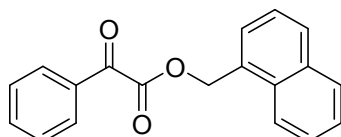

**Naphthalen-1-ylmethyl 2-oxo-2-phenylacetate (3ak)** Colorless liquid;  $^1\text{H}$  NMR (400 MHz,  $\text{CDCl}_3$ ):  $\delta$  8.08 (d,  $J = 8.2$  Hz, 1H), 7.94-7.88 (m, 4 H), 7.65-7.43 (m, 7 H), 5.89 (s, 2 H);  $^{13}\text{C}$  NMR (100 MHz,  $\text{CDCl}_3$ ):  $\delta$  186.0, 163.8, 134.9, 133.8, 132.4, 131.5, 130.1, 130.0, 129.9, 128.9, 128.2, 126.8, 126.1, 125.3, 123.3, 66.0; ESI-HRMS Calcd for  $\text{C}_{19}\text{H}_{14}\text{O}_3\text{Na}$   $[\text{M}+\text{Na}]^+$  313.08352, found 313.08267.

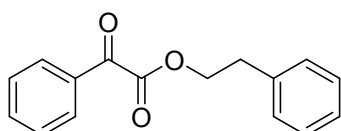

**Phenethyl 2-oxo-2-phenylacetate (3al)**<sup>13</sup> Colorless liquid;  $^1\text{H}$  NMR (400 MHz,  $\text{CDCl}_3$ ):  $\delta$  7.85 (d,  $J = 7.8$  Hz, 2 H), 7.63 (t,  $J = 7.4$  Hz, 1 H), 7.45 (t,  $J = 7.6$  Hz, 2H), 7.33-7.24 (m, 5 H), 4.62 (t,  $J = 7.0$  Hz, 2 H), 3.09 (t,  $J = 7.0$  Hz, 2 H);  $^{13}\text{C}$  NMR (100

MHz, CDCl<sub>3</sub>):  $\delta$  186.3, 163.7, 137.0, 134.9, 132.4, 130.0, 129.0, 128.9, 128.7, 126.9, 66.4, 35.0.

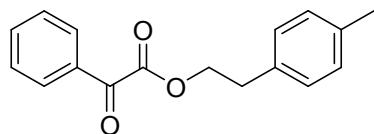

**4-Methylphenethyl 2-oxo-2-phenylacetate (3am)** Colorless liquid; <sup>1</sup>H NMR (400 MHz, CDCl<sub>3</sub>):  $\delta$  7.89-7.84 (m, 2 H), 7.63 (t, *J* = 7.4 Hz, 1 H), 7.45 (t, *J* = 7.8 Hz, 2 H), 7.15-7.10 (m, 4 H), 4.59 (t, *J* = 7.0 Hz, 2 H), 3.05 (t, *J* = 7.0 Hz, 2 H), 2.34 (s, 3 H); <sup>13</sup>C NMR (100 MHz, CDCl<sub>3</sub>):  $\delta$  186.3, 163.7, 136.4, 134.8, 133.8, 132.4, 130.0, 129.4, 128.9, 128.8, 66.6, 34.6, 21.1; ESI-HRMS Calcd for C<sub>17</sub>H<sub>16</sub>O<sub>3</sub>Na [M+Na]<sup>+</sup> 291.09917, found 291.09852.

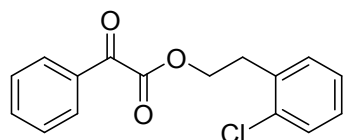

**2-Chlorophenethyl 2-oxo-2-phenylacetate (3an)**<sup>14</sup> Colorless liquid; <sup>1</sup>H NMR (400 MHz, CDCl<sub>3</sub>):  $\delta$  7.88-7.80 (m, 2 H), 7.65 (t, *J* = 7.4 Hz, 1H), 7.47 (t, *J* = 7.8 Hz, 2 H), 7.28 (d, *J* = 8.4 Hz, 2 H), 7.19 (d, *J* = 8.4 Hz, 2 H), 4.60 (t, *J* = 6.8 Hz, 2 H), 3.06 (t, *J* = 6.8 Hz, 2 H); <sup>13</sup>C NMR (100 MHz, CDCl<sub>3</sub>):  $\delta$  186.1, 163.6, 135.5, 134.9, 132.8, 132.3, 130.4, 123.0, 128.9, 128.8, 66.0, 34.3.

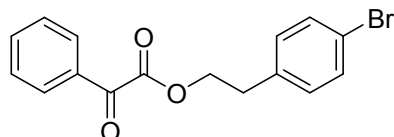

**4-Bromophenethyl 2-oxo-2-phenylacetate (3ao)**<sup>14</sup> Colorless liquid; <sup>1</sup>H NMR (400 MHz, CDCl<sub>3</sub>):  $\delta$  7.83 (d, *J* = 7.8 Hz, 2 H), 7.65 (t, *J* = 7.4 Hz, 1 H), 7.49-7.42 (m, 4 H), 7.13 (d, *J* = 8.2 Hz, 2 H), 4.59 (t, *J* = 6.8 Hz, 2 H), 3.04 (t, *J* = 6.8 Hz, 2 H); <sup>13</sup>C NMR (100 MHz, CDCl<sub>3</sub>):  $\delta$  186.1, 163.6, 136.0, 135.0, 132.3, 131.8, 130.8, 130.0, 128.9, 120.8, 65.9, 34.4.

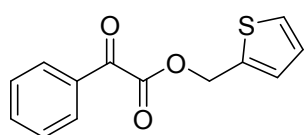

**Thiophen-2-ylmethyl 2-oxo-2-phenylacetate (3ap)** Colorless liquid;  $^1\text{H}$  NMR (400 MHz,  $\text{CDCl}_3$ ):  $\delta$  7.99-7.93 (m, 2 H), 7.66-7.62 (m, 1 H), 7.48 (t,  $J = 7.8$  Hz, 3 H), 7.38 (dd,  $J = 5.1, 1.0$  Hz, 1 H), 7.22 (d,  $J = 3.4$  Hz, 1 H), 7.04-6.99 (m, 1 H), 5.57 (s, 2 H);  $^{13}\text{C}$  NMR (100 MHz,  $\text{CDCl}_3$ ):  $\delta$  185.8, 163.4, 136.2, 135.0, 132.4, 130.1, 129.5, 128.9, 127.7, 127.1, 61.8; ESI-HRMS Calcd for  $\text{C}_{11}\text{H}_{12}\text{O}_5\text{SNa}$   $[\text{M}+\text{Na}]^+$  269.02429, found 269.02385.

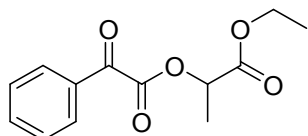

**Ethyl 2-(2-oxo-2-phenylacetoxy)propanoate (3aq)** Colorless liquid;  $^1\text{H}$  NMR (400 MHz,  $\text{CDCl}_3$ ):  $\delta$  8.13 (d,  $J = 7.4$  Hz, 2 H), 7.68 (t,  $J = 7.4$  Hz, 1 H), 7.54 (t,  $J = 7.6$  Hz, 2 H), 5.33 (q,  $J = 7.0$  Hz, 1 H), 4.30 (q,  $J = 7.0$  Hz, 2 H), 1.64 (d,  $J = 7.0$  Hz, 3 H), 1.34 (t,  $J = 7.0$  Hz, 3 H);  $^{13}\text{C}$  NMR (100 MHz,  $\text{CDCl}_3$ ):  $\delta$  186.1, 169.8, 163.4, 135.1, 132.4, 130.3, 128.9, 70.3, 61.9, 16.8, 14.1; ESI-HRMS Calcd for  $\text{C}_{13}\text{H}_{14}\text{O}_5\text{Na}$   $[\text{M}+\text{Na}]^+$  273.07334, found 273.07251.

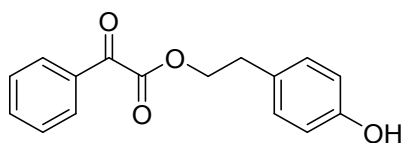

**4-Hydroxyphenethyl 2-oxo-2-phenylacetate (3ar)** Yellow liquid;  $^1\text{H}$  NMR (400 MHz,  $\text{CDCl}_3$ ):  $\delta$  7.86 (d,  $J = 8.0$  Hz, 2 H), 7.64 (t,  $J = 7.0$  Hz, 1 H), 7.47 (t,  $J = 7.6$  Hz, 2 H), 7.12 (d,  $J = 8.0$  Hz, 2 H), 6.78 (d,  $J = 8.0$  Hz, 2 H), 4.99 (s, 1 H), 4.57 (t,  $J = 6.8$  Hz, 2 H), 3.01 (t,  $J = 7.0$  Hz, 2 H).  $^{13}\text{C}$  NMR (100 MHz,  $\text{CDCl}_3$ ):  $\delta$  186.4, 163.8, 154.5, 134.9, 132.4, 130.2, 130.0, 129.1, 128.8, 115.5, 66.6, 34.1; ESI-HRMS Calcd for  $\text{C}_{16}\text{H}_{14}\text{O}_4\text{Na}$   $[\text{M}+\text{Na}]^+$  293.07843, found 293.07780.

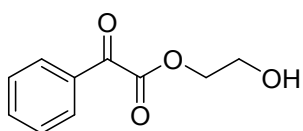

**2-Hydroxyethyl 2-oxo-2-phenylacetate (3as)** Reddish brown liquid;  $^1\text{H}$  NMR (400 MHz,  $\text{CDCl}_3$ ):  $\delta$  8.03 (d,  $J = 7.2$  Hz, 2 H), 7.67 (t,  $J = 7.4$  Hz, 1 H), 7.51 (t,  $J = 7.6$  Hz, 2 H), 4.54-4.47 (m, 2 H), 3.99-3.93 (m, 2 H), 2.24 (s, 1 H);  $^{13}\text{C}$  NMR (100 MHz,

CDCl<sub>3</sub>):  $\delta$  186.1, 163.6, 135.1, 132.4, 130.2, 128.9, 67.5, 60.6; ESI-HRMS Calcd for C<sub>10</sub>H<sub>10</sub>O<sub>4</sub>Na [M+Na]<sup>+</sup> 217.04713, found 217.04684.

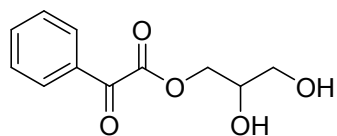

**2,3-Dihydroxypropyl 2-oxo-2-phenylacetate (3at)** Light brown liquid; <sup>1</sup>H NMR (400 MHz, CDCl<sub>3</sub>):  $\delta$  8.02 (d, *J* = 8.2 Hz, 2 H), 7.66 (t, *J* = 7.4 Hz, 1 H), 7.50 (t, *J* = 7.0 Hz, 2 H), 4.51-4.38 (m, 2 H), 4.12-4.05 (m, 1 H), 3.81-3.74 (m, 1 H), 3.72-3.65 (m, 1 H), 3.13-3.02 (m, 2 H); <sup>13</sup>C NMR (100 MHz, CDCl<sub>3</sub>):  $\delta$  186.0, 163.4, 135.2, 132.2, 130.2, 129.0, 69.8, 66.8, 63.2; ESI-HRMS Calcd for C<sub>11</sub>H<sub>12</sub>O<sub>5</sub>Na [M+Na]<sup>+</sup> 247.05769, found 247.05710.

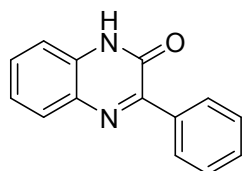

**3-Phenylquinoxalin-2(1H)-one (5a)**<sup>15</sup> Yellow solid; mp 244-245 °C; <sup>1</sup>H NMR (400 MHz, DMSO-*d*<sub>6</sub>):  $\delta$  12.57 (s, 1 H), 8.33-8.30 (m, 2 H), 7.86-7.83 (m, 1 H), 7.56-7.49 (m, 4 H), 7.37-7.33 (m, 2 H). <sup>13</sup>C NMR (100 MHz, DMSO-*d*<sub>6</sub>):  $\delta$  155.1, 154.6, 136.1, 132.5, 132.5, 130.8, 130.6, 129.7, 129.2, 128.3, 123.8, 115.6.

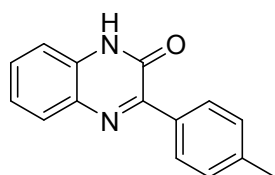

**3-(*p*-Tolyl)quinoxalin-2(1H)-one (5b)**<sup>15</sup> Yellow solid; mp 264-265 °C; <sup>1</sup>H NMR (400 MHz, DMSO-*d*<sub>6</sub>):  $\delta$  12.50 (s, 1 H), 8.27 (d, *J* = 8.0 Hz, 2 H), 7.82 (d, *J* = 8.0 Hz, 1 H), 7.52 (t, *J* = 7.6 Hz, 1 H), 7.35-7.27 (m, 4 H), 2.38 (s, 3 H). <sup>13</sup>C NMR (100 MHz, DMSO-*d*<sub>6</sub>):  $\delta$  155.1, 154.2, 140.5, 133.4, 132.5, 132.4, 130.5, 129.6, 129.1, 128.9, 123.8, 115.5, 21.5.

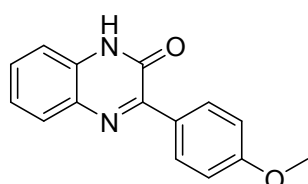

**3-(4-Methoxyphenyl)quinoxalin-2(1H)-one (5c)**<sup>15</sup> Light yellow solid; mp 275-276 °C; <sup>1</sup>H NMR (400 MHz, DMSO-*d*<sub>6</sub>): δ 12.49 (s, 1 H), 8.40 (d, *J* = 8.8 Hz, 2 H), 7.81 (d, *J* = 7.8 Hz, 1 H), 7.51 (t, *J* = 7.4 Hz, 1H), 7.35-7.29 (m, 2 H), 7.05 (d, *J* = 8.0 Hz, 2 H), 3.85 (s, 3 H); <sup>13</sup>C NMR (100 MHz, DMSO-*d*<sub>6</sub>): δ 161.5, 155.2, 153.6, 132.5, 132.2, 131.4, 130.2, 128.9, 128.6, 123.8, 115.5, 113.8, 55.8.

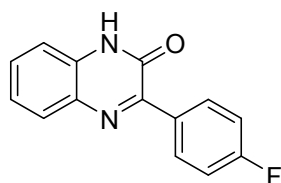

**3-(4-Fluorophenyl)quinoxalin-2(1H)-one (5d)** Yellow solid; mp 273-274 °C; <sup>1</sup>H NMR (400 MHz, DMSO-*d*<sub>6</sub>): δ 12.60 (s, 1 H), 8.46-8.39 (m, 2 H), 7.84 (d, *J* = 8.0 Hz, 1 H), 7.58-7.53 (m, 1 H), 7.37-7.30 (m, 4 H). <sup>13</sup>C NMR (100 MHz, DMSO-*d*<sub>6</sub>): δ 163.8 (d, <sup>1</sup>*J*<sub>C-F</sub> = 247 Hz), 155.0, 153.3, 132.6, 132.6, 132.5, 132.4, 132.2, 132.1 (d, <sup>3</sup>*J*<sub>C-F</sub> = 8 Hz), 129.2, 123.9, 115.6, 115.3 (d, <sup>2</sup>*J*<sub>C-F</sub> = 21 Hz); ESI-HRMS Calcd for C<sub>14</sub>H<sub>10</sub>FN<sub>2</sub>O [M+Na]<sup>+</sup> 241.07717, found 241.07677.

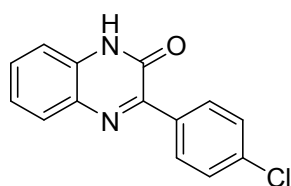

**3-(4-Chlorophenyl)quinoxalin-2(1H)-one (5e)**<sup>15</sup> Yellow solid; mp 286-287 °C; <sup>1</sup>H NMR (400 MHz, DMSO-*d*<sub>6</sub>): δ 12.62 (s, 1 H), 8.39 (d, *J* = 8.0 Hz, 2 H), 7.84 (d, *J* = 8.0 Hz, 2 H), 7.59-7.55 (m, 3 H), 7.35 (d, *J* = 7.6 Hz, 2 H). <sup>13</sup>C NMR (100 MHz, DMSO-*d*<sub>6</sub>): δ 155.0, 153.2, 135.6, 134.8, 132.6, 132.4, 131.4, 131.0, 129.3, 128.4, 123.9, 115.6.

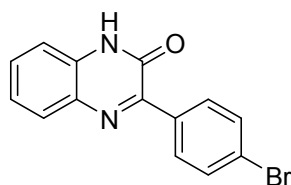

**3-(4-Bromophenyl)quinoxalin-2(1H)-one (5f)**<sup>15</sup> Yellow solid; mp 282-283 °C; <sup>1</sup>H NMR (400 MHz, DMSO-*d*<sub>6</sub>): δ 12.63 (s, 1 H), 8.31 (d, *J* = 8.0 Hz, 2 H), 7.86-7.83 (m, 1 H), 7.71 (d, *J* = 8.0 Hz, 2 H), 7.58-7.54 (m, 1 H), 7.35 (d, *J* = 8.0 Hz, 2 H). <sup>13</sup>C



NMR (100 MHz, DMSO-*d*<sub>6</sub>):  $\delta$  155.0, 153.3, 135.2, 132.6, 132.4, 131.7, 131.4, 131.0, 129.3, 124.5, 124.0, 115.6.

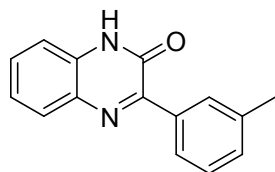

**3-(*m*-Tolyl)quinoxalin-2(1H)-one (5g)** Yellow solid; mp 225-226 °C; <sup>1</sup>H NMR (400 MHz, DMSO-*d*<sub>6</sub>):  $\delta$  12.56 (s, 1 H), 8.13 (d, *J* = 6.4 Hz, 2 H), 7.86-7.83 (m, 1 H), 7.57-7.52 (m, 1 H), 7.41-7.32 (m, 4 H), 2.41 (s, 3 H); <sup>13</sup>C NMR (100 MHz, DMSO-*d*<sub>6</sub>):  $\delta$  155.0, 154.7, 137.4, 136.1, 132.5, 131.3, 130.7, 130.0, 129.2, 128.2, 127.0, 123.8, 115.5, 21.6; ESI-HRMS Calcd for C<sub>15</sub>H<sub>12</sub>N<sub>2</sub>ONa [M+Na]<sup>+</sup> 259.08418, found 259.08373.

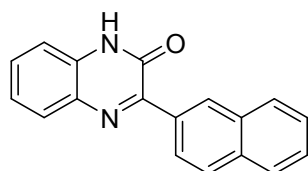

**3-(Naphthalen-2-yl)quinoxalin-2(1H)-one (5h)** Yellow solid; mp 135-136 °C; <sup>1</sup>H NMR (400 MHz, DMSO-*d*<sub>6</sub>):  $\delta$  12.64 (s, 1 H), 9.12 (s, 1 H), 8.40 (dd, *J* = 8.0, 4.0 Hz, 1 H), 8.06 (d, *J* = 7.2 Hz, 1 H), 7.99 (m, 2 H), 7.90 (d, *J* = 7.8 Hz, 1 H), 7.61-7.54 (m, 3 H), 7.40-7.33 (m, 2 H); <sup>13</sup>C NMR (100 MHz, DMSO-*d*<sub>6</sub>):  $\delta$  155.2, 154.0, 134.1, 133.5, 132.8, 132.6, 132.5, 130.8, 130.3, 129.5, 129.3, 128.0, 127.9, 127.7, 126.9, 126.4, 123.9, 115.6; ESI-HRMS Calcd for C<sub>18</sub>H<sub>12</sub>N<sub>2</sub>ONa [M+Na]<sup>+</sup> 295.08418, found 295.08369.

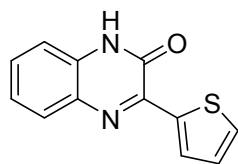

**3-(Thiophen-2-yl)quinoxalin-2(1H)-one (5i)**<sup>16</sup> Yellow solid; mp 167-168 °C; <sup>1</sup>H NMR (400 MHz, DMSO-*d*<sub>6</sub>):  $\delta$  12.70 (s, 1 H), 8.44-8.41 (m, 1 H), 7.86-7.83 (m, 1 H), 7.79 (d, *J* = 8.0 Hz, 1 H), 7.55-7.51 (m, 1 H), 7.38-7.32 (m, 2 H), 7.27-7.24 (m, 1 H); <sup>13</sup>C NMR (100 MHz, DMSO-*d*<sub>6</sub>):  $\delta$  153.9, 149.4, 139.4, 132.5, 132.4, 131.9, 131.8, 130.2, 128.6, 128.4, 124.1, 115.8.

## References

- (1) F. M. A. A. EL-Taweel, M. H. Elnagdi, *J. Heterocyclic Chem.* **2001**, *38*, 981.
- (2) Y. Gao, Y. Liu, J.-P. Wan, *J. Org. Chem.* **2019**, *84*, 2243.
- (3) Z. Zhang, J. Su, Z. Zha, Z. Wang, *Chem. Eur. J.* **2013**, *19*, 17711.
- (4) R. Infante, J. Nieto, C. Andres, *Chem. Eur. J.* **2012**, *18*, 4375.
- (5) Y. Xie, J. Liu, Y. Huang, L. Yao, *Tetrahedron Lett.* **2015**, *56*, 3793.
- (6) A. Nagaki, D. Ichinari, J. I. Yoshida, *Chem. Commun.* **2013**, *49*, 3242.
- (7) Y. Kumar, Y. Jaiswal, A. Kumar, *J. Org. Chem.* **2016**, *81*, 12247.
- (8) H. Shimizu, M. Murakami, *Chem. Commun.* **2007**, *27*, 2855.
- (9) A. Cochi, T. X. Metro, D. G. Pardo, J. Cossy, *Org. Lett.* **2010**, *12*, 3693.
- (10) R. Ntaganda, T. Milovic, J. Tiburcio, A. N. Thadani, *Chem. Commun.* **2008**, *34*, 4052.
- (11) T. Shao, X. Fang, J. Zhou, C. Jin, X. Yang, F. Wu, *Synlett* **2017**, *28*, 2018.
- (12) S. M. Nicolle, C. J. Hayes, C. J. Moody, *Chem. Eur. J.* **2015**, *21*, 4576.
- (13) C. Zhang, N. Jiao, *Org. Chem. Front.* **2014**, *1*, 109.
- (14) S. Guo, Z. Dai, Z. Yang, N. Zhu, L. Wan, X. Li, C. Liu, Z. Fang, K. Guo, *RSC Adv.* **2016**, *6*, 98422.
- (15) M. Nagaraj, S. Sathiyamoorthy, M. Boominathan, S. Muthusubramanian, N. Bhuvanesh, *J. Heterocyclic Chem.* **2013**, *50*, 1146.
- (16) A. N. Matthew, J. Zephyr, C. J. Hill, M. Jahangir, A. Newton, C. J. Petropoulos, W. Huang, N. K. Yilmaz, C. A. Schiffer, A. Ali, *J. Med. Chem.* **2017**, *60*, 5699.

# $^1\text{H}$ and $^{13}\text{C}$ NMR spectra of all products

## $^1\text{H}$ and $^{13}\text{C}$ NMR spectra of **3a**

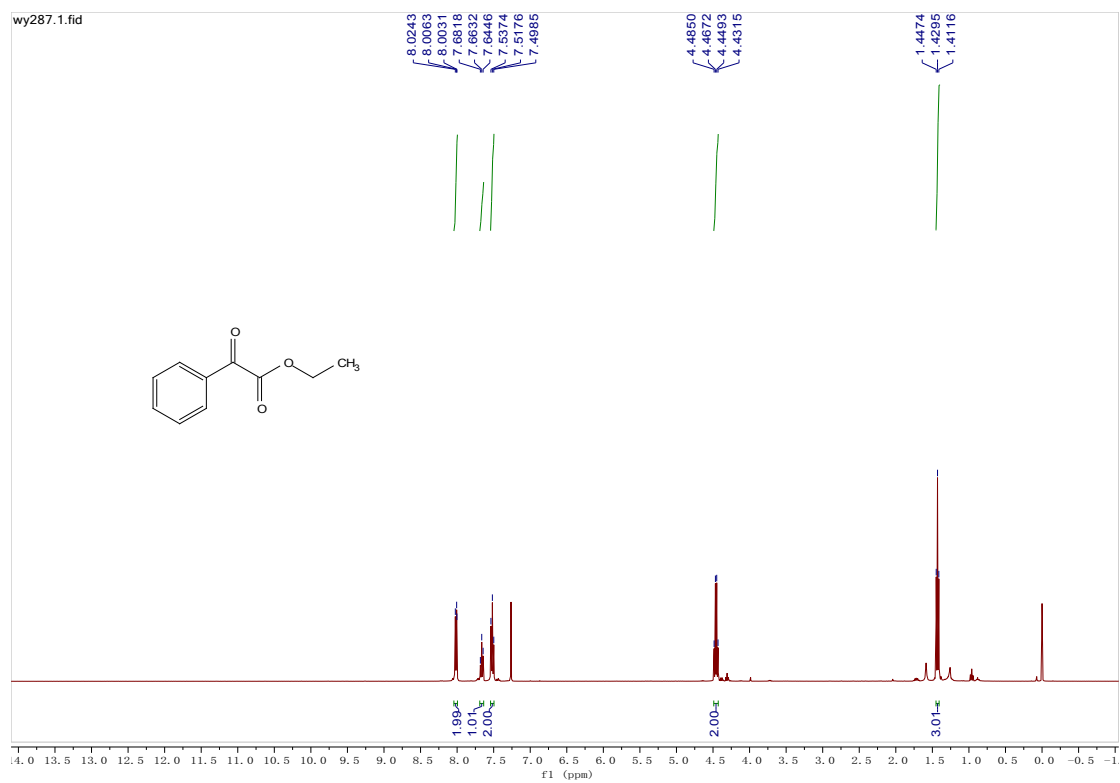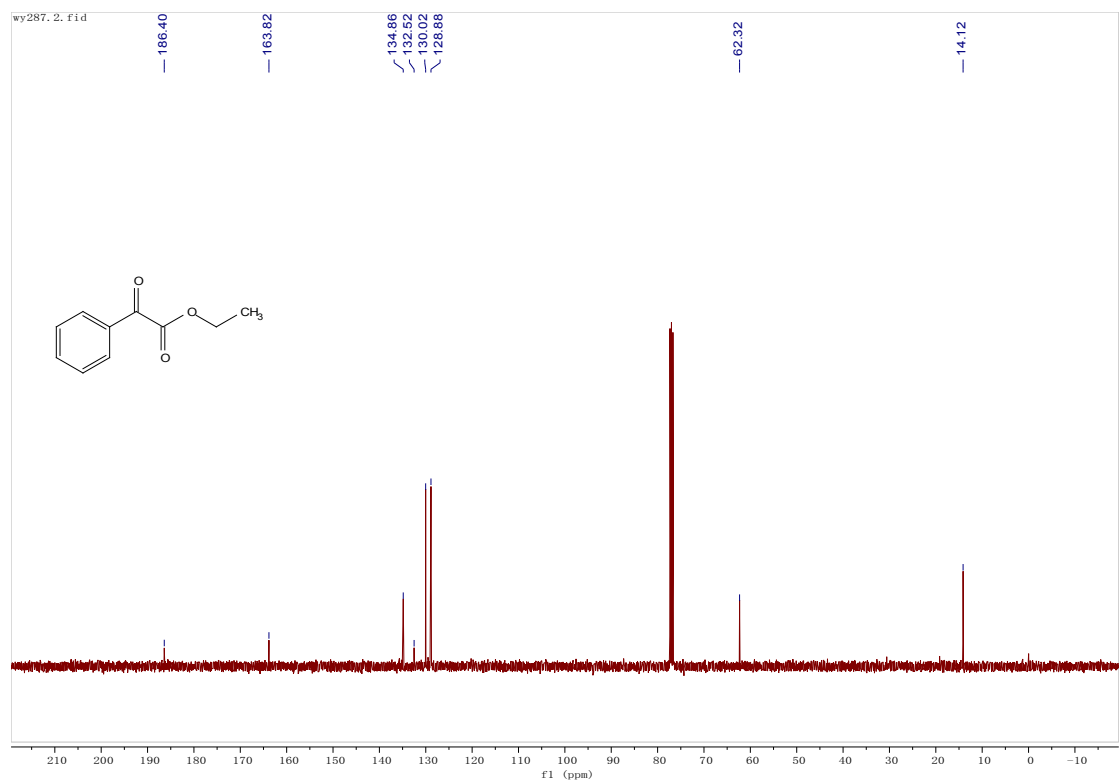

# $^1\text{H}$ and $^{13}\text{C}$ NMR spectra of **3b**

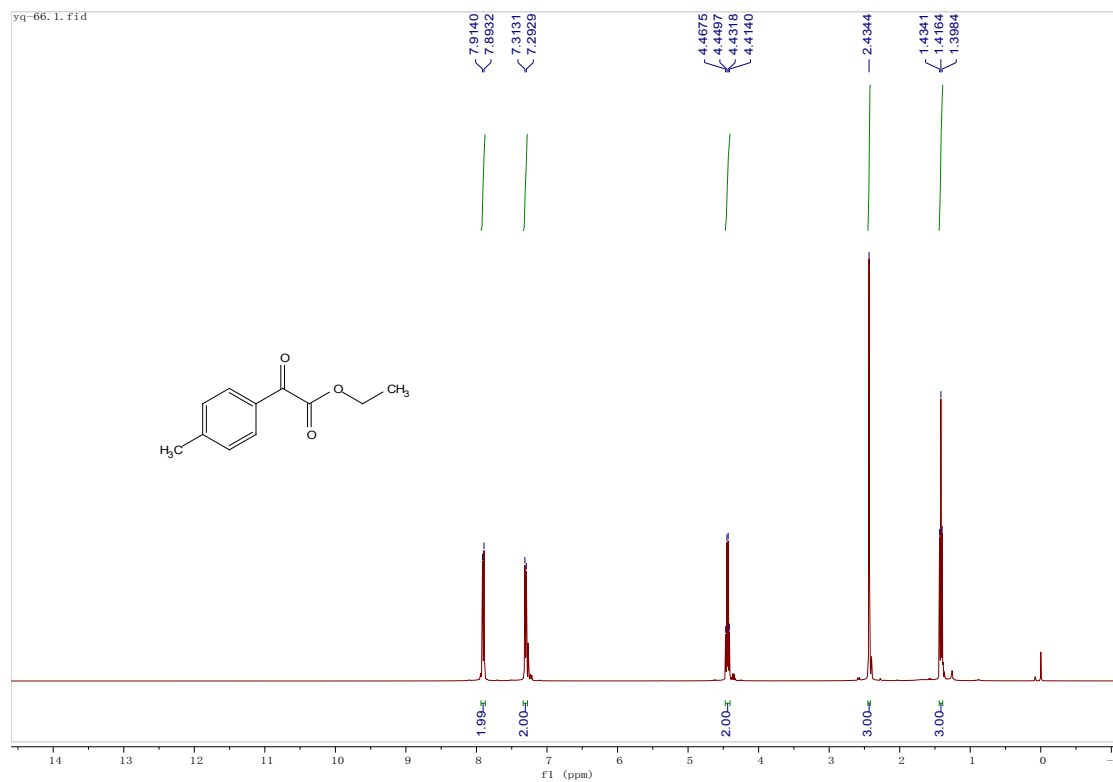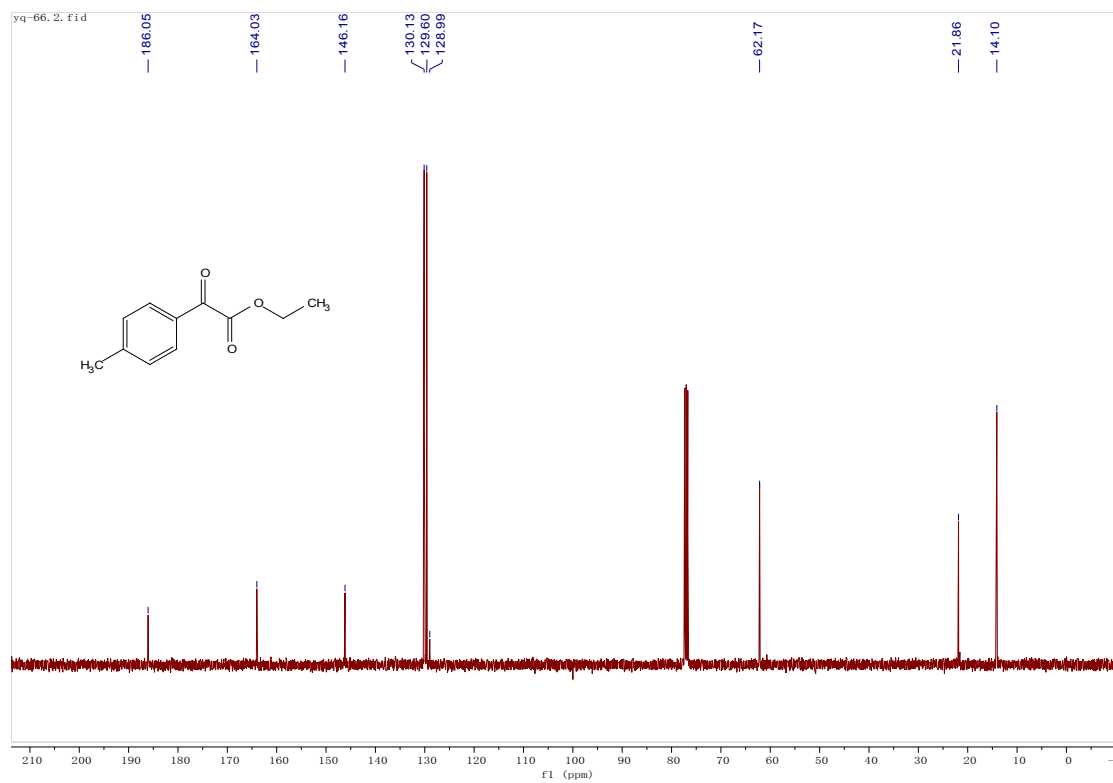

# $^1\text{H}$ and $^{13}\text{C}$ NMR spectra of **3c**

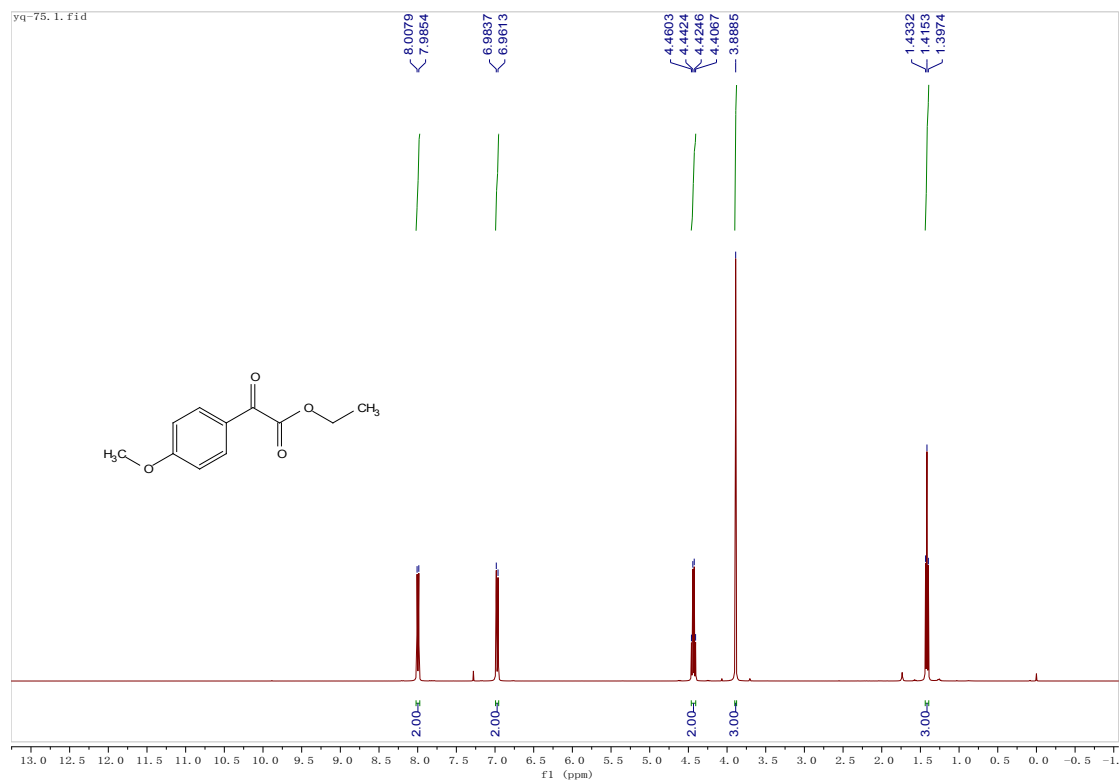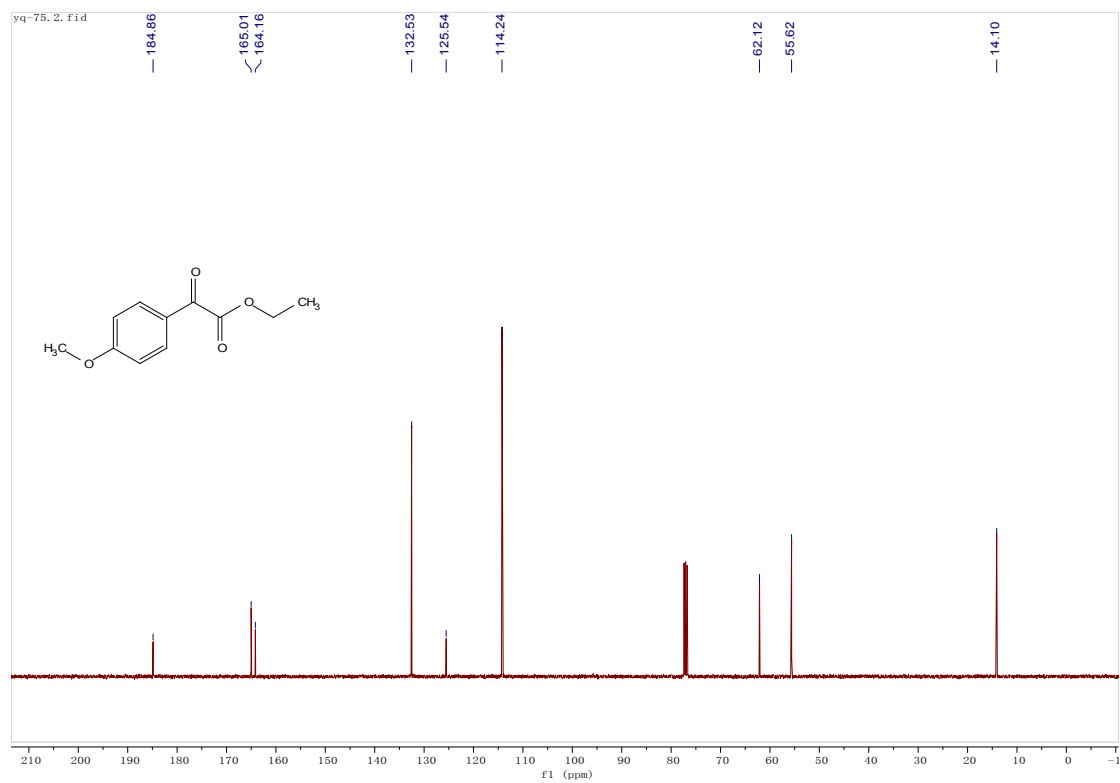

# $^1\text{H}$ and $^{13}\text{C}$ NMR spectra of **3d**

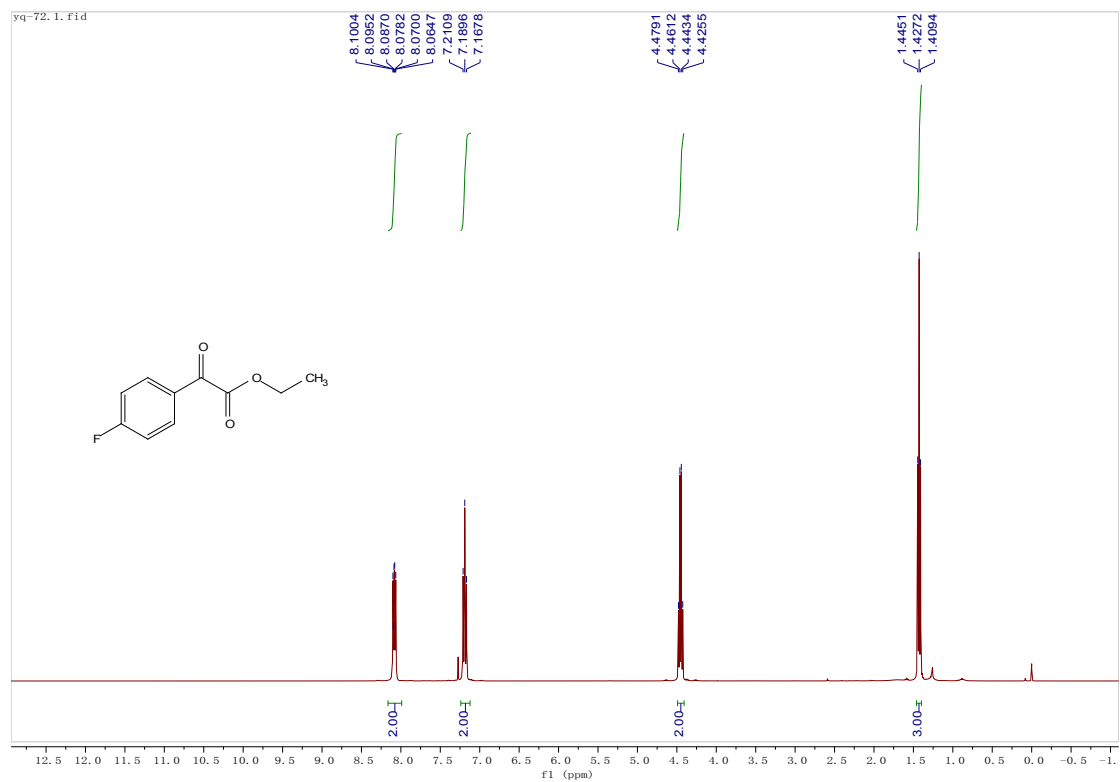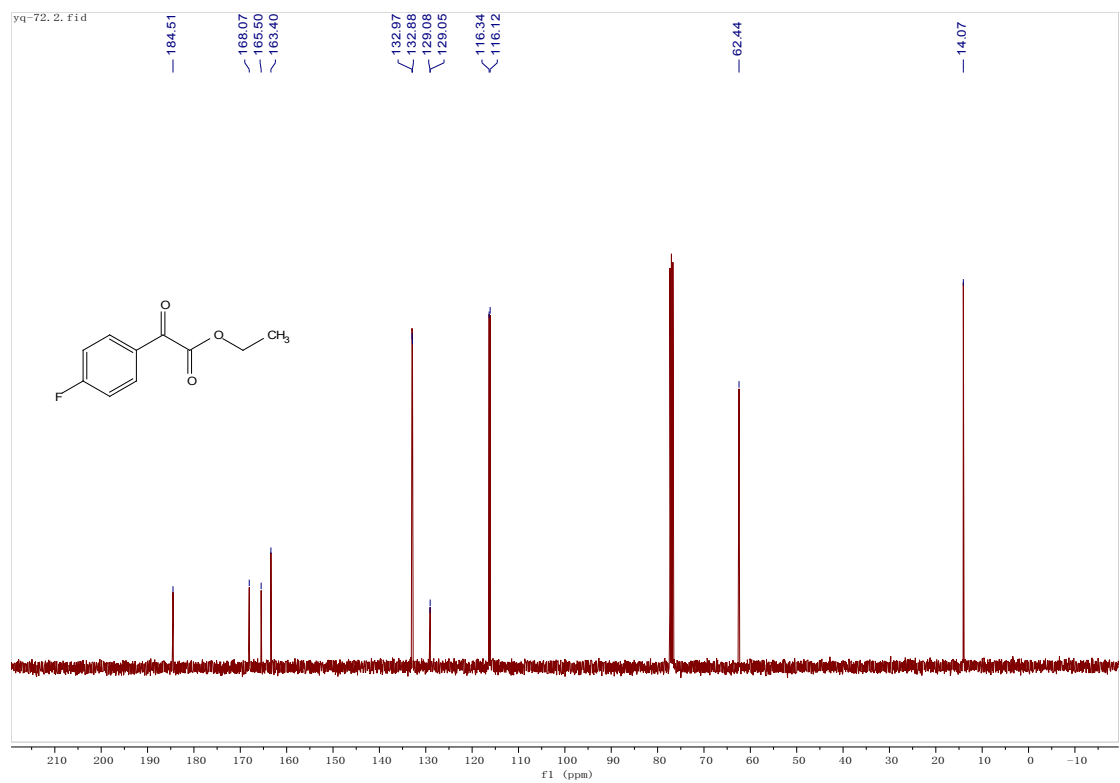

# $^1\text{H}$ and $^{13}\text{C}$ NMR spectra of **3e**

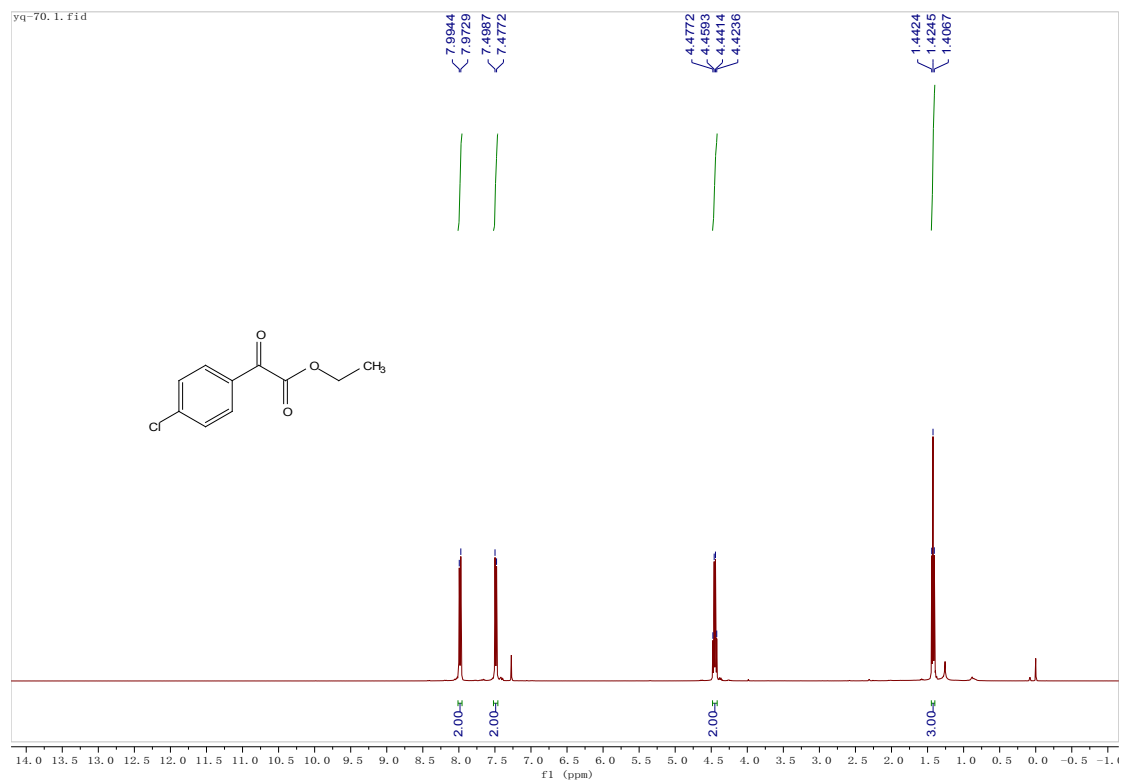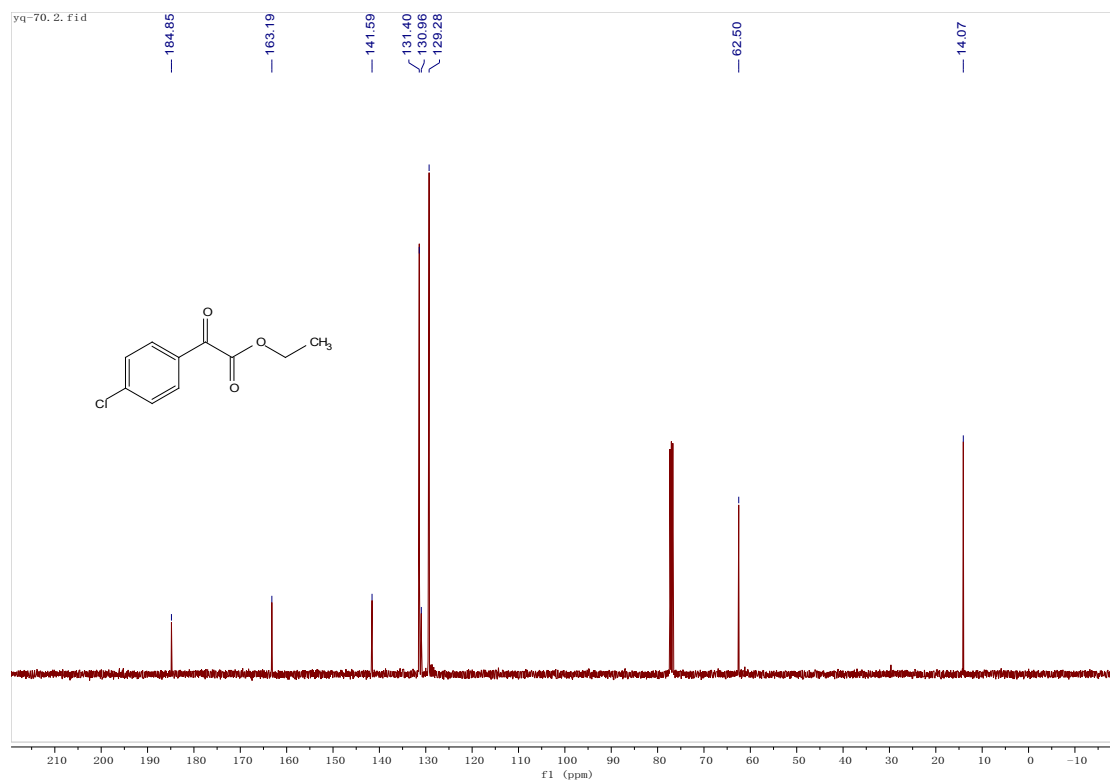

# $^1\text{H}$ and $^{13}\text{C}$ NMR spectra of **3f**

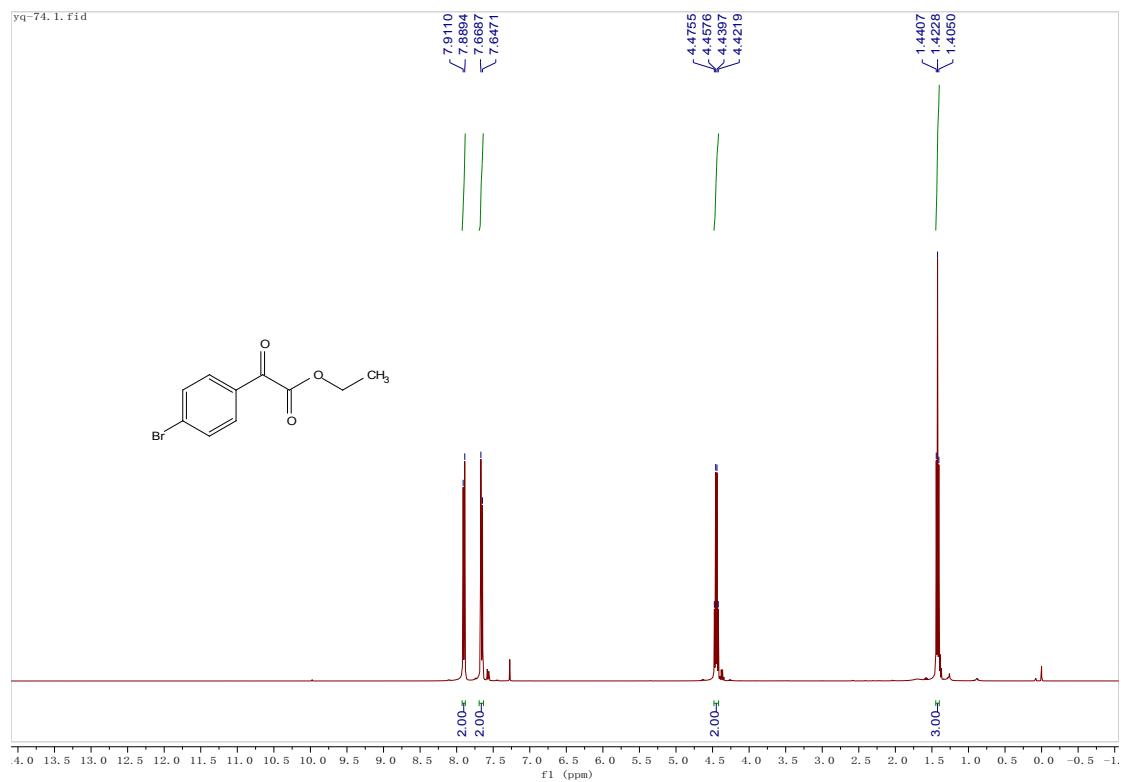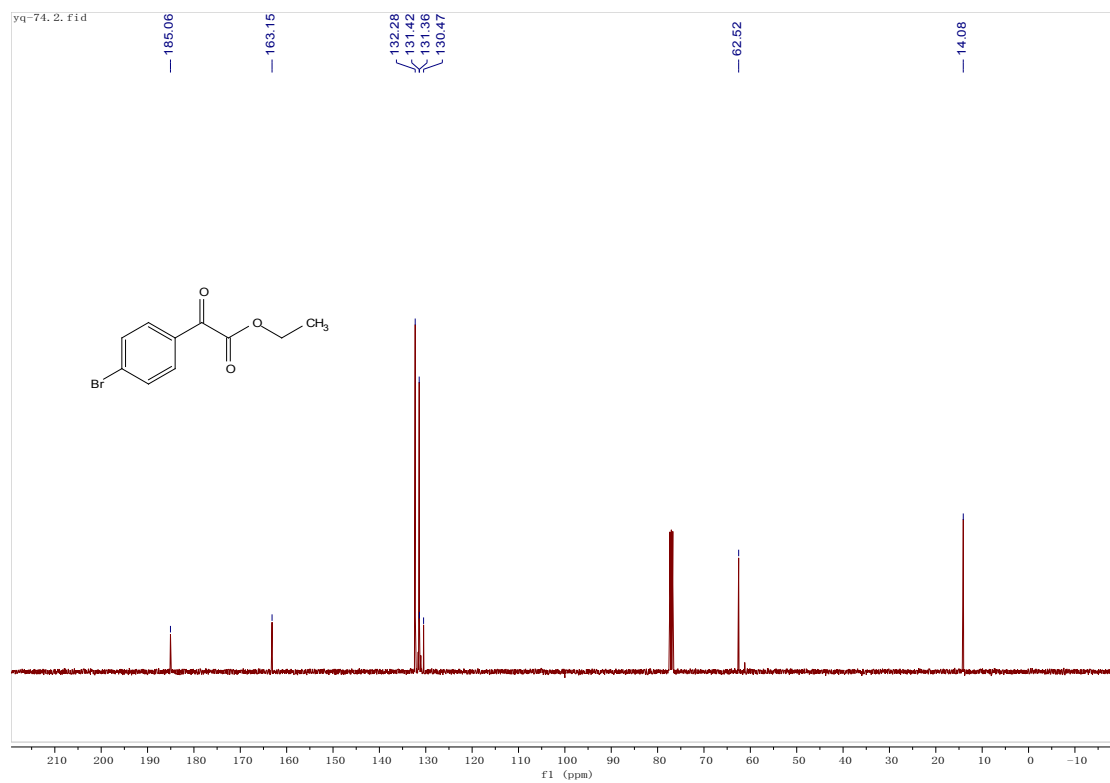



# $^1\text{H}$ and $^{13}\text{C}$ NMR spectra of **3g**

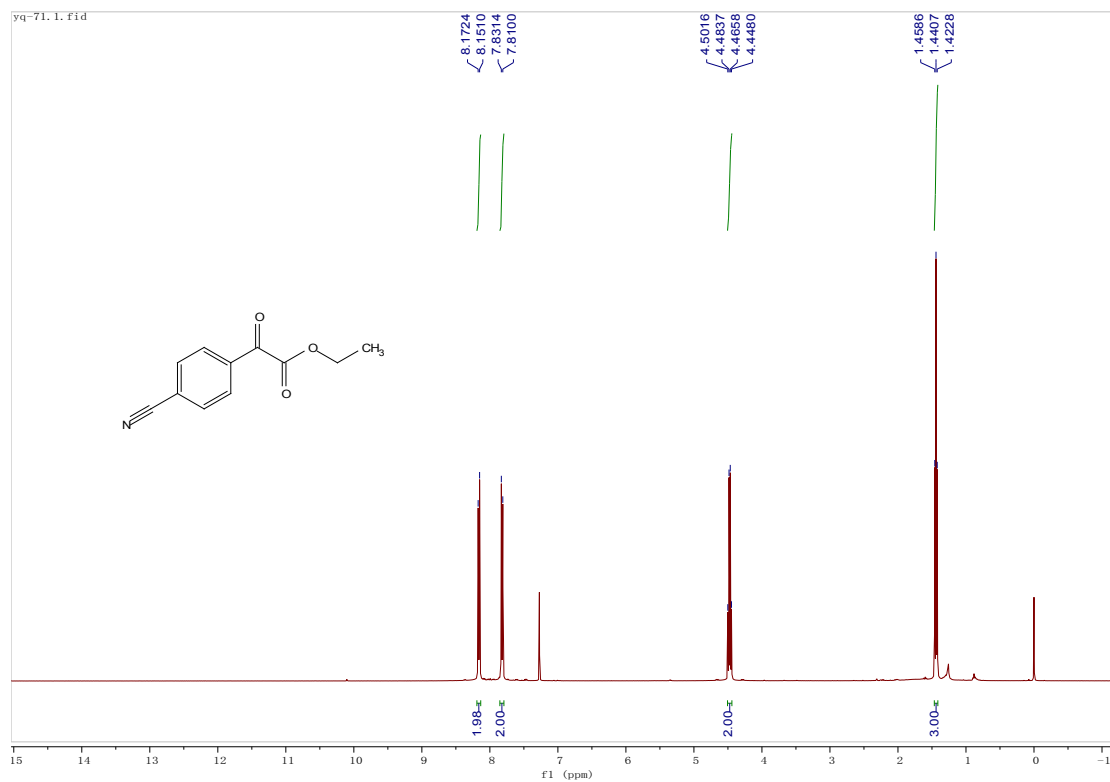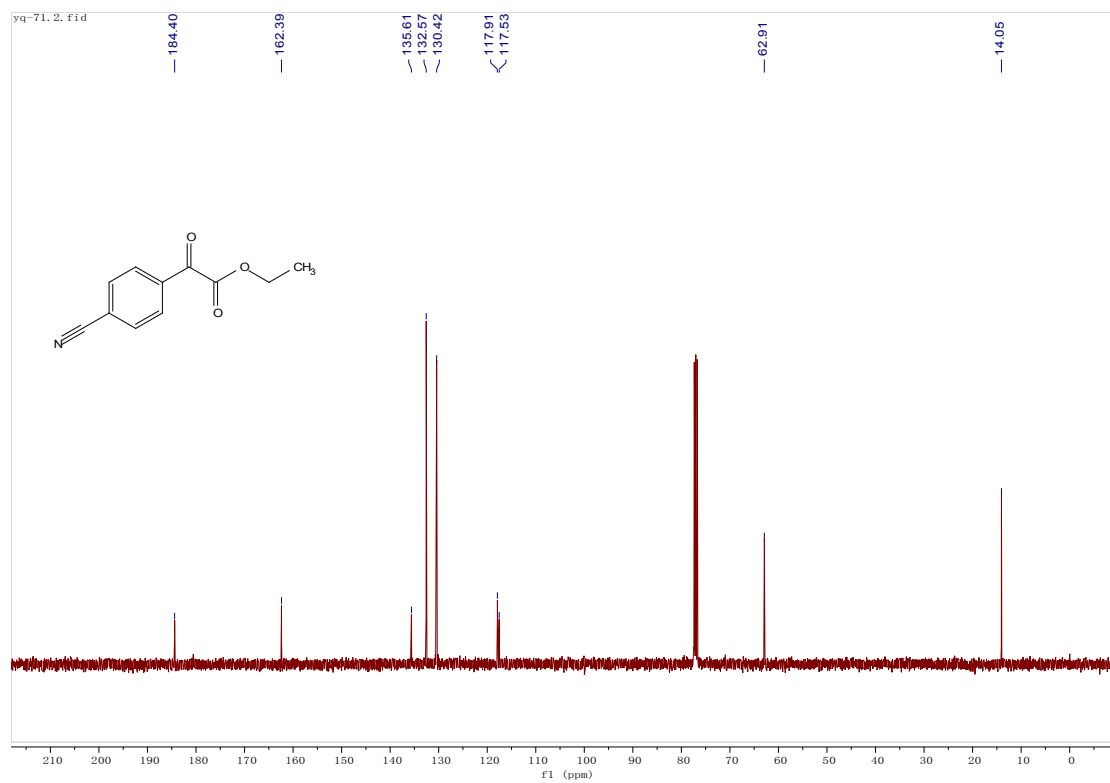

# $^1\text{H}$ and $^{13}\text{C}$ NMR spectra of **3h**

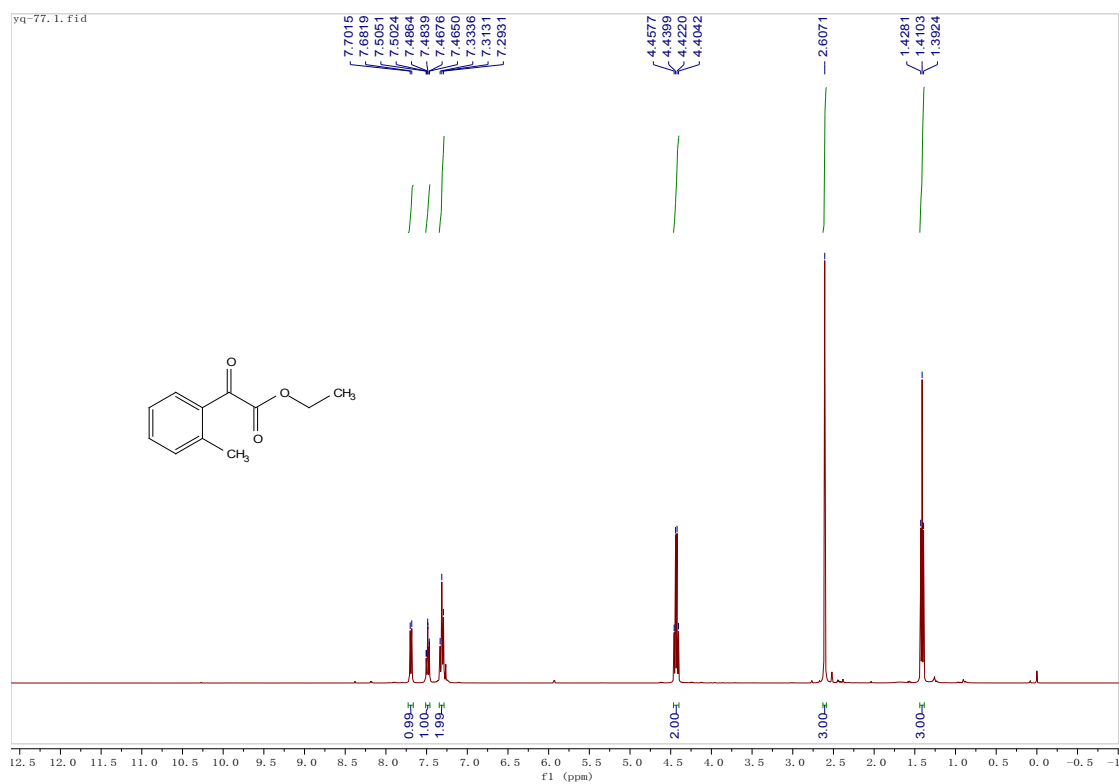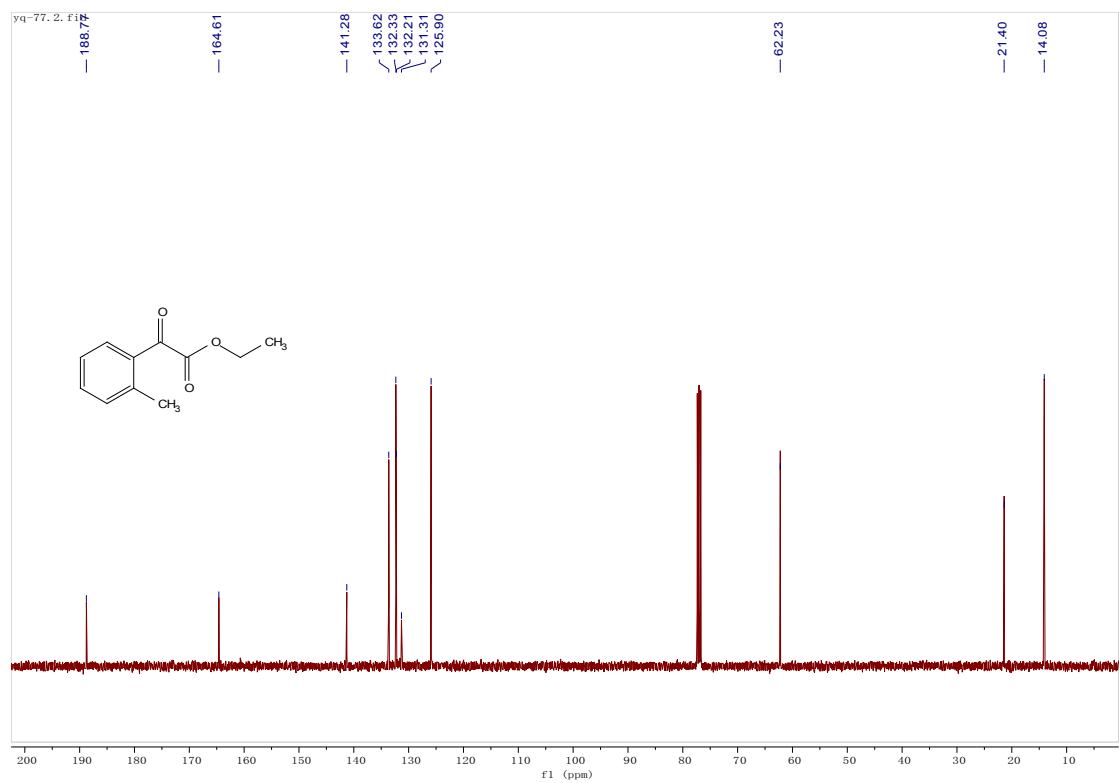

# $^1\text{H}$ and $^{13}\text{C}$ NMR spectra of **3i**

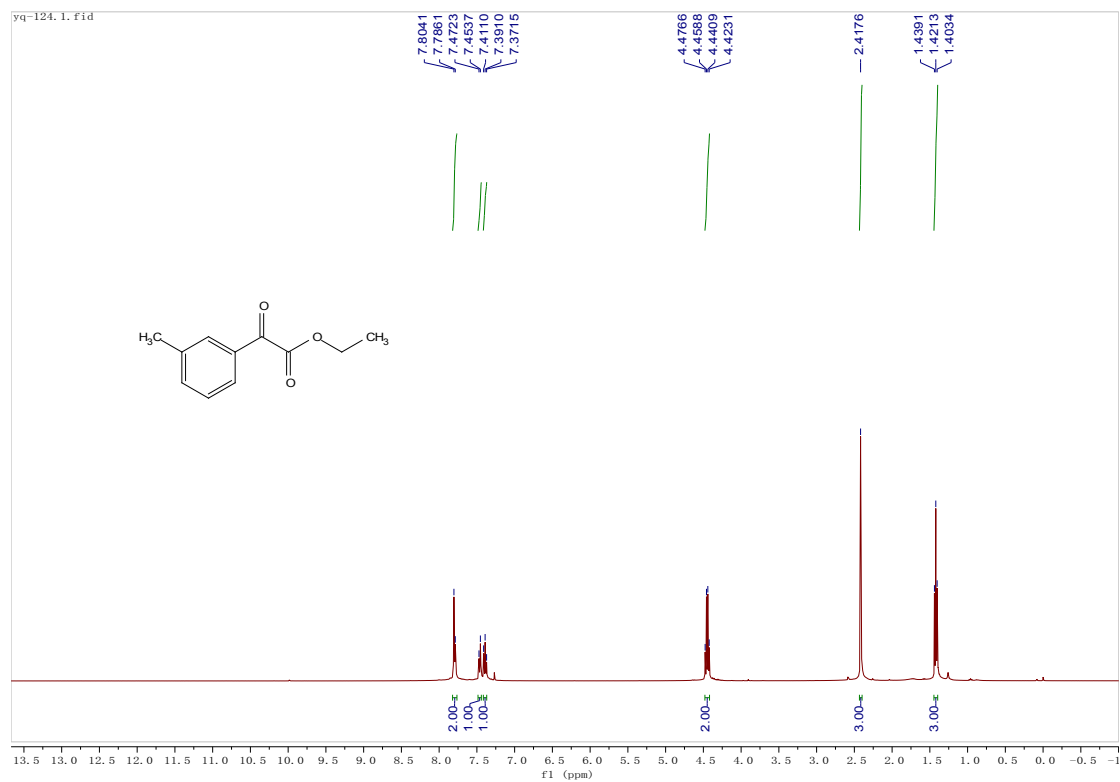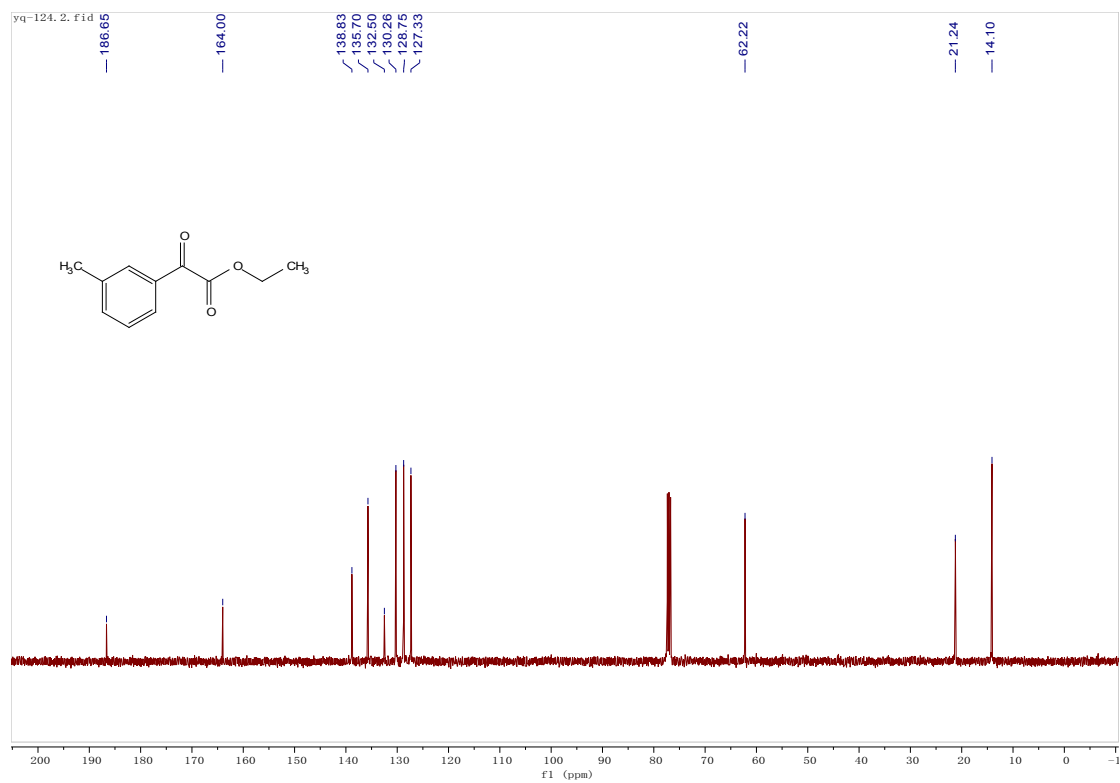

# $^1\text{H}$ and $^{13}\text{C}$ NMR spectra of **3j**

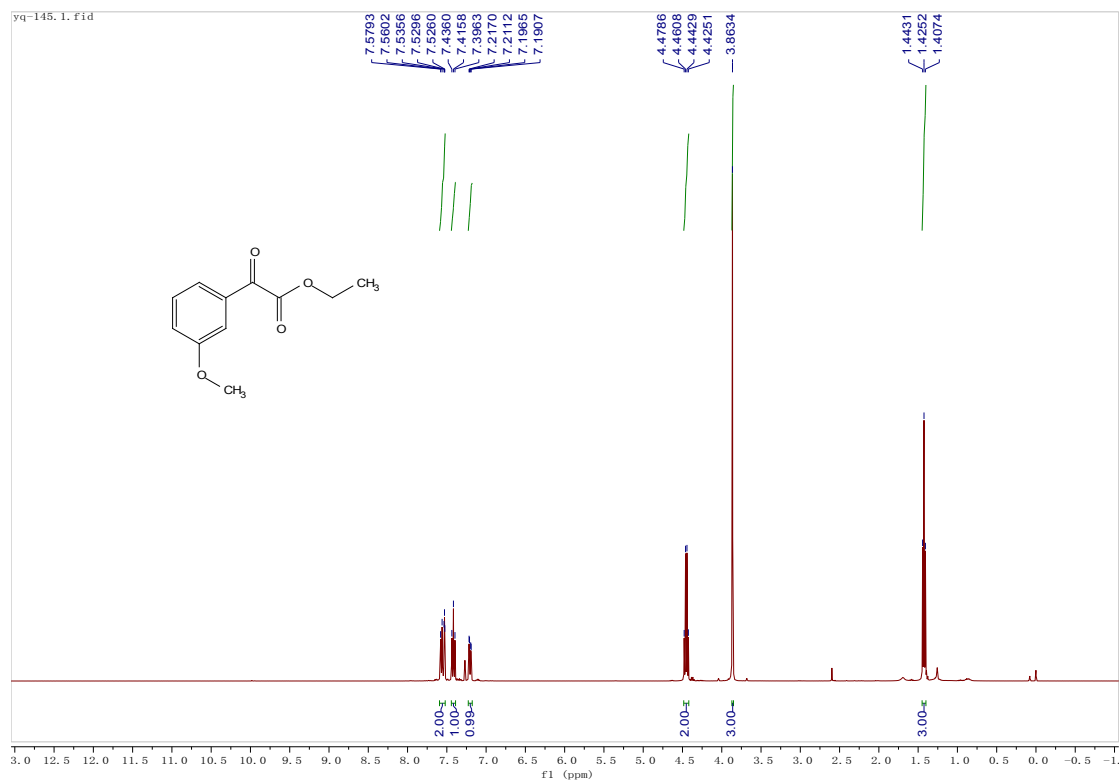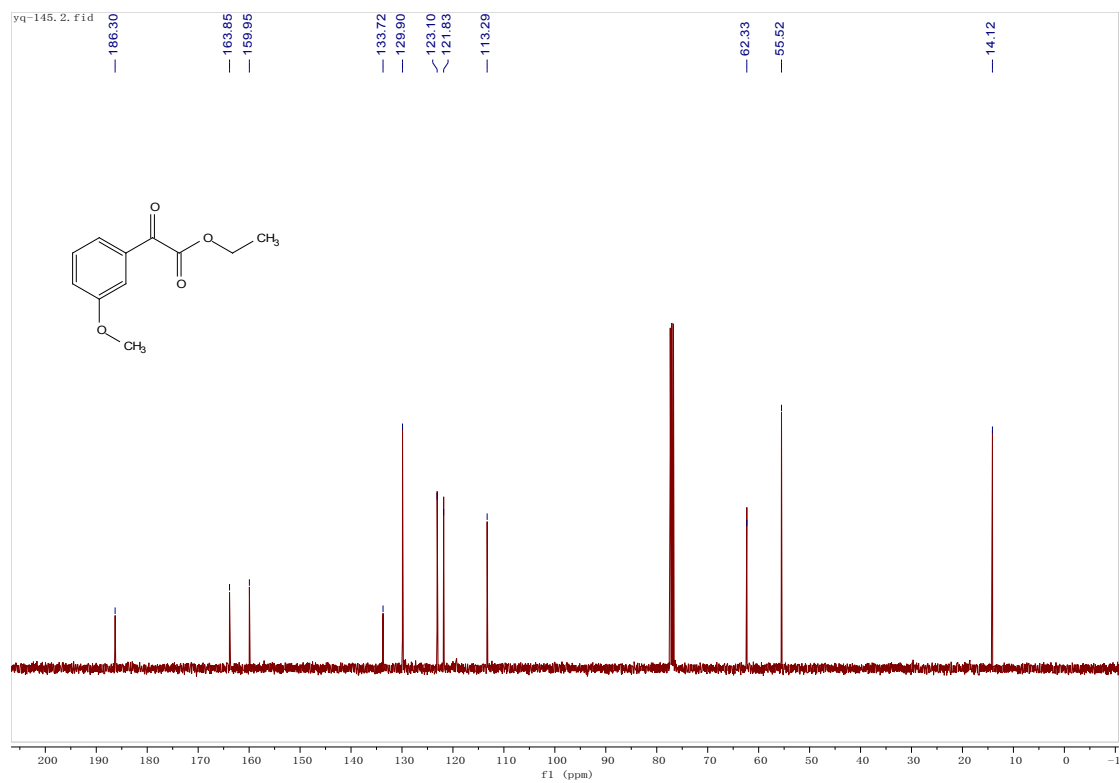

# $^1\text{H}$ and $^{13}\text{C}$ NMR spectra of **3k**

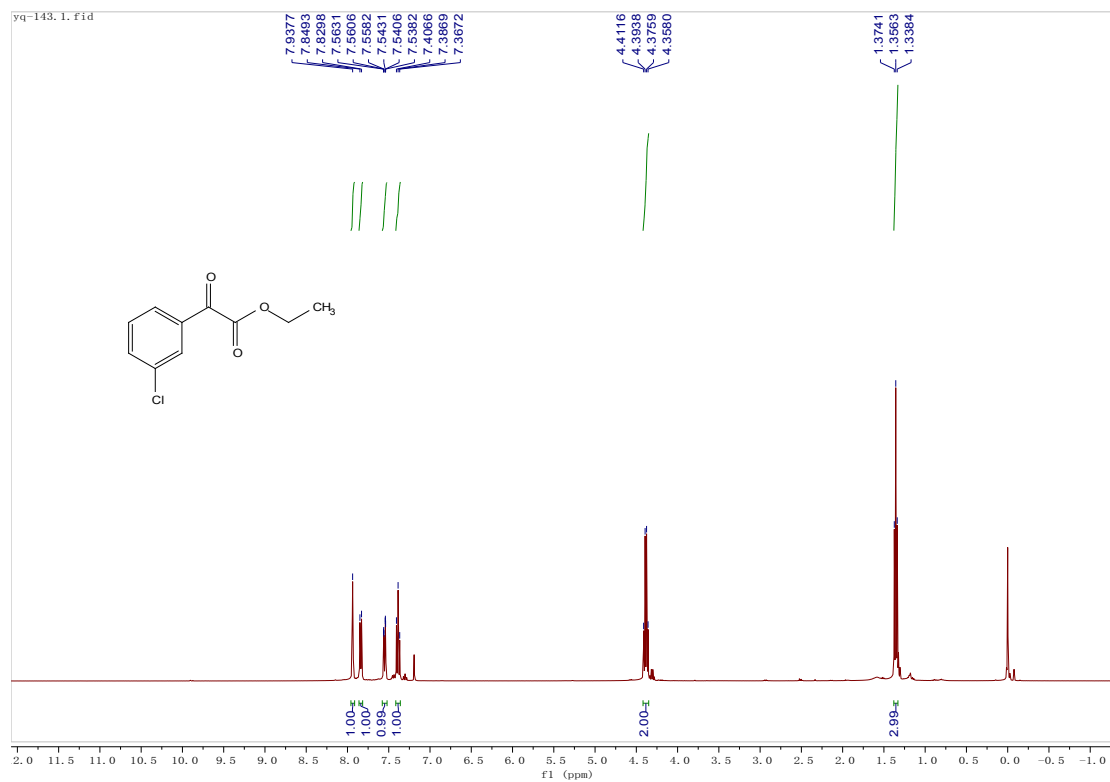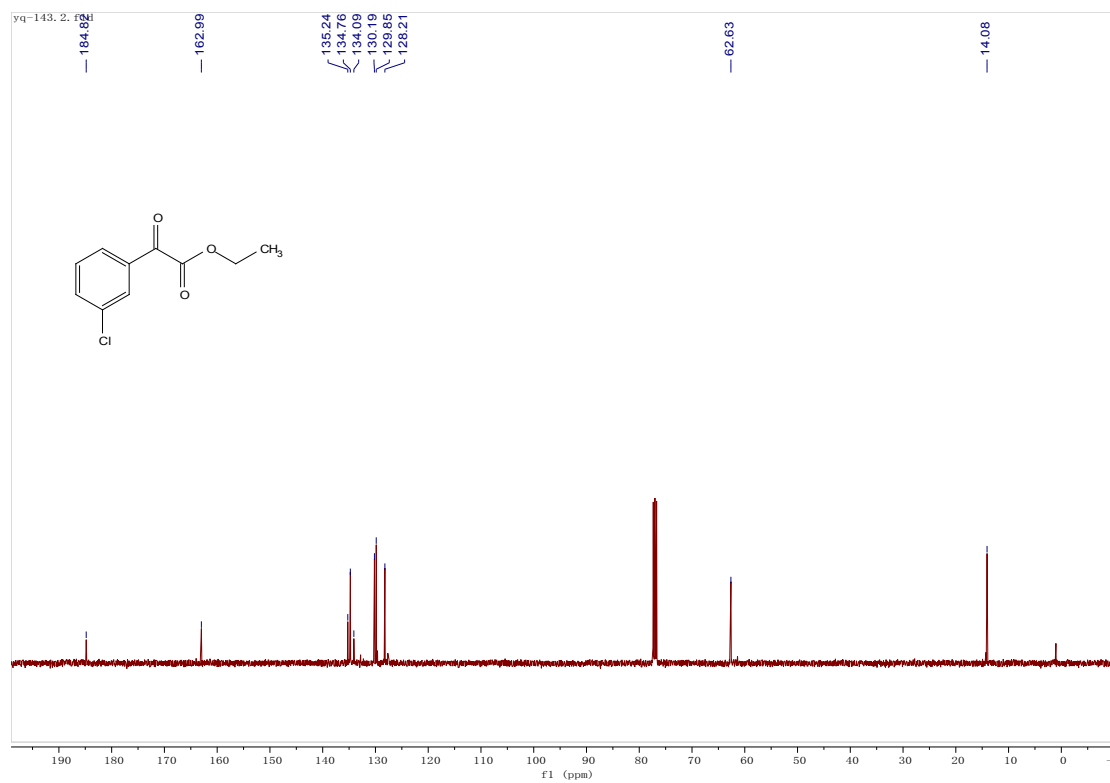

# $^1\text{H}$ and $^{13}\text{C}$ NMR spectra of **31**

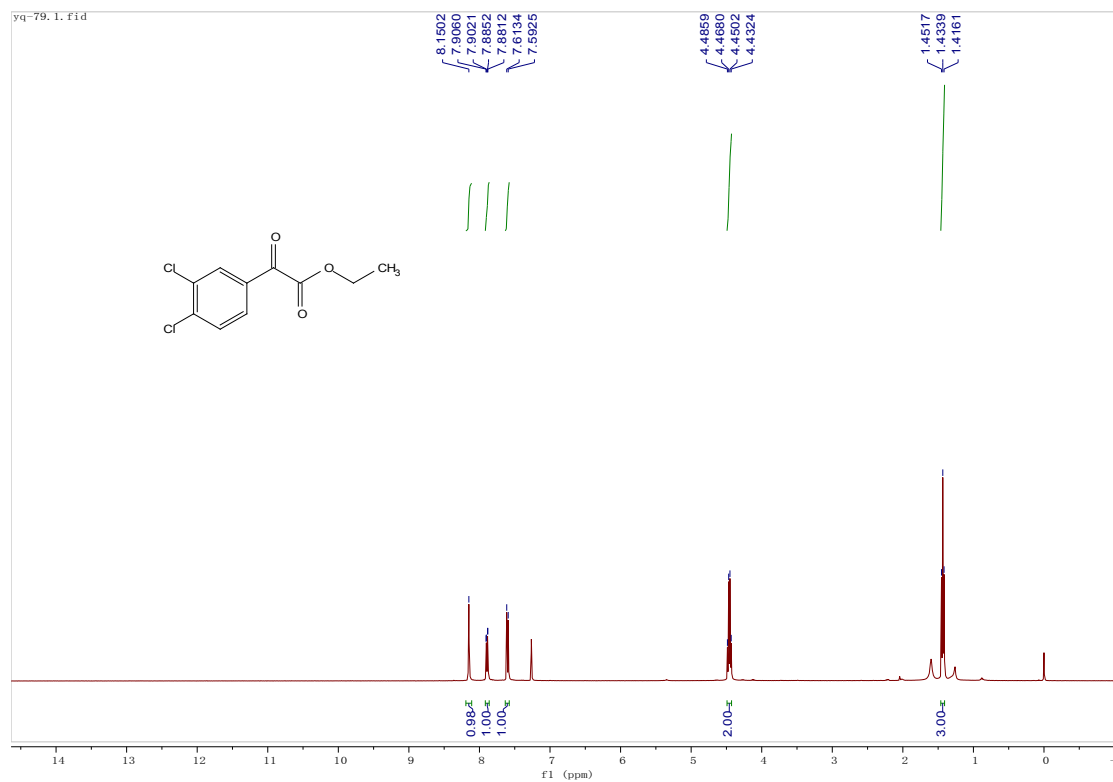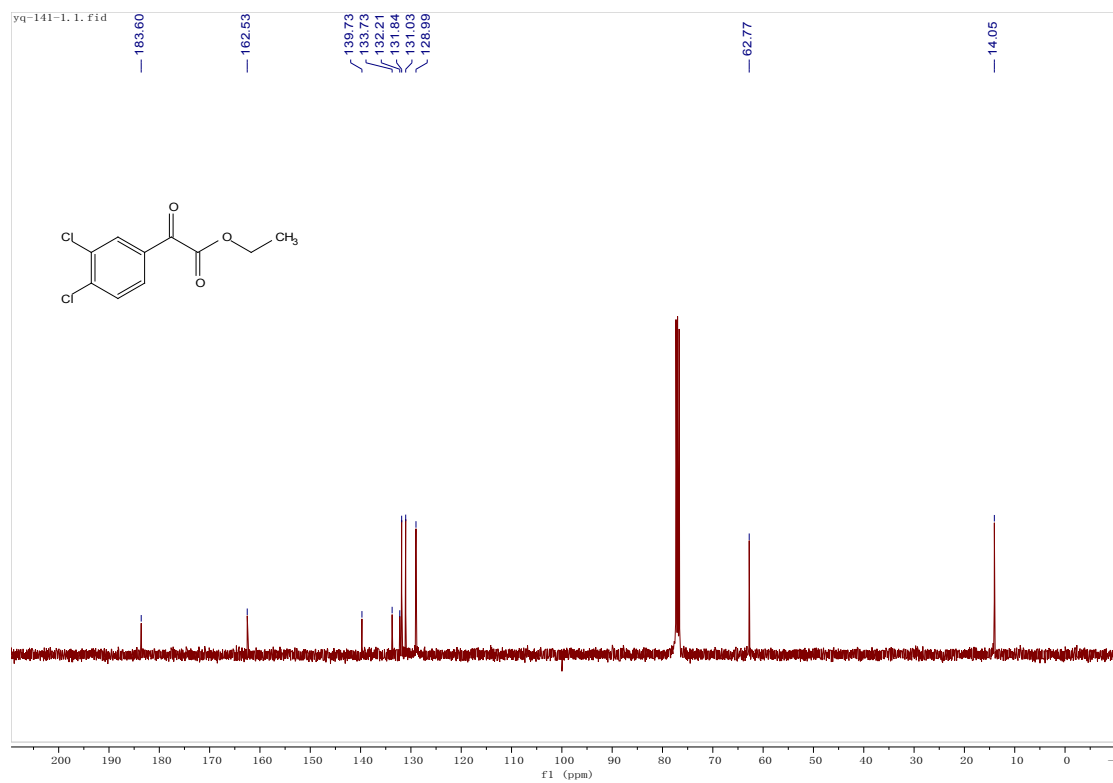

# $^1\text{H}$ and $^{13}\text{C}$ NMR spectra of **3m**

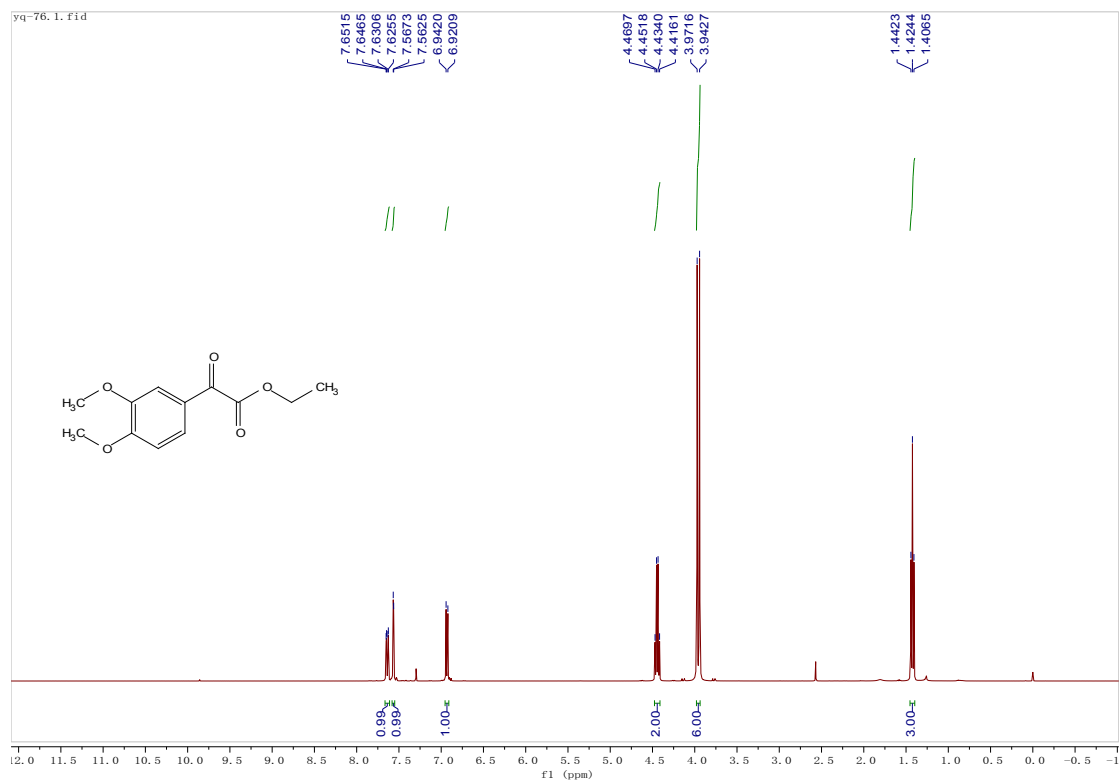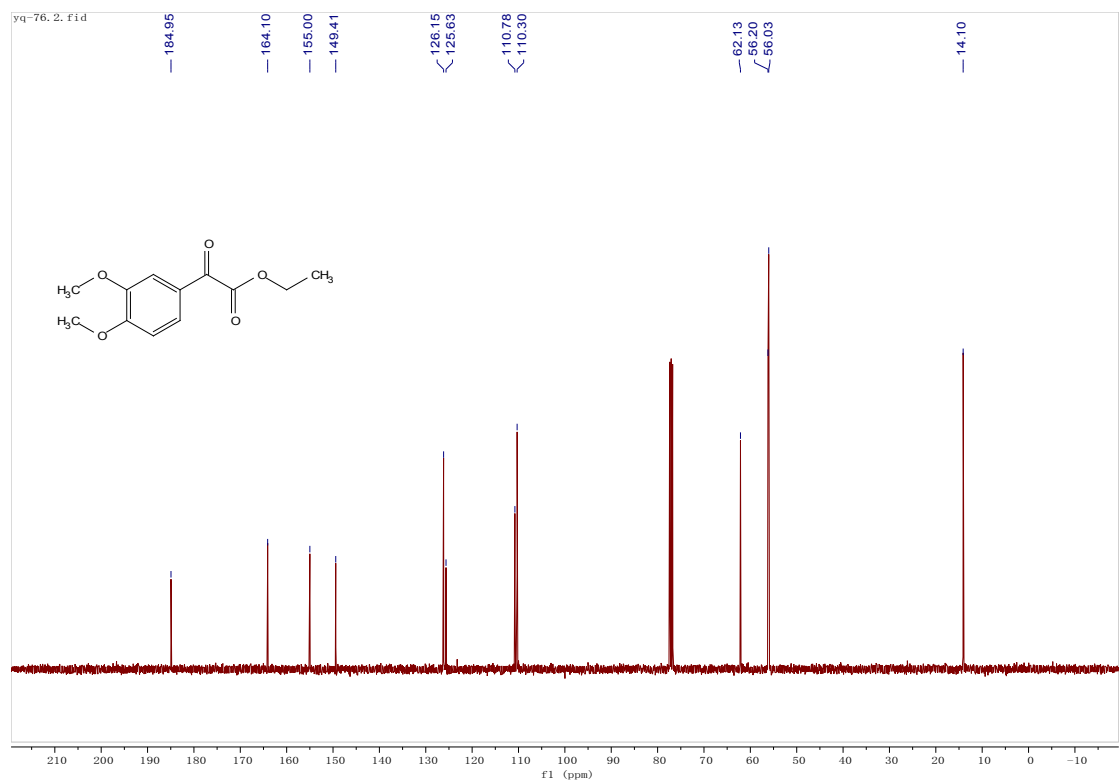

# <sup>1</sup>H and <sup>13</sup>C NMR spectra of 3n

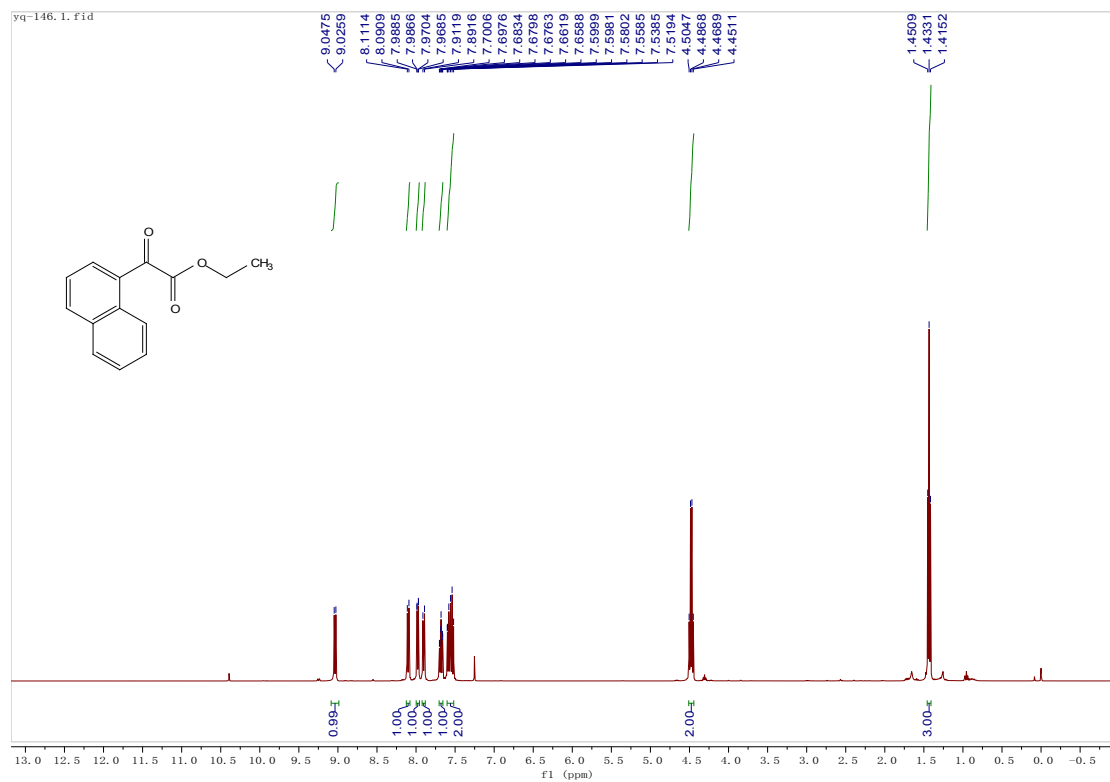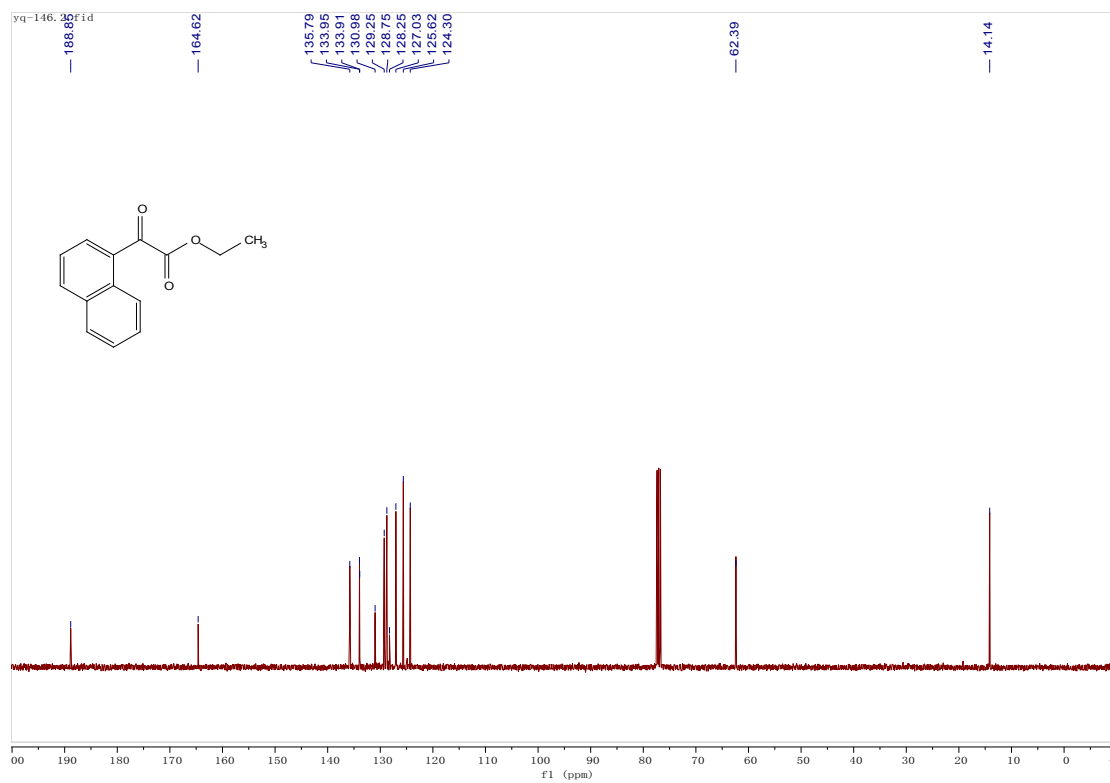



# $^1\text{H}$ and $^{13}\text{C}$ NMR spectra of **3o**

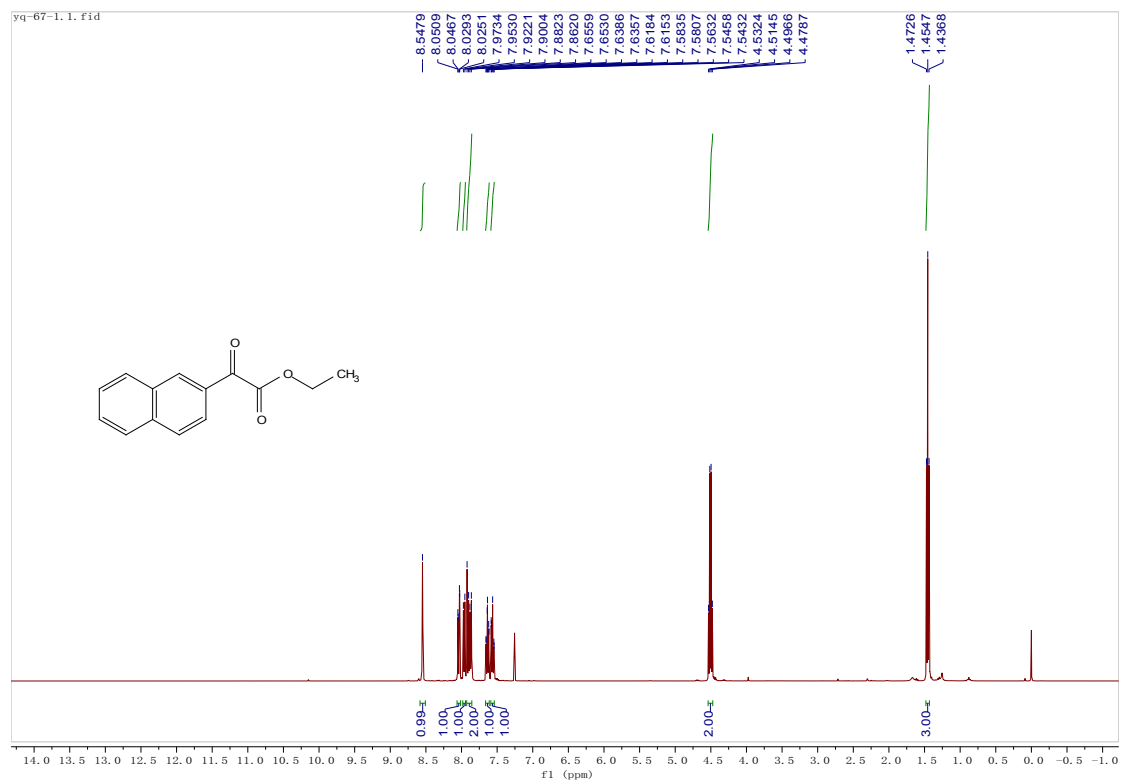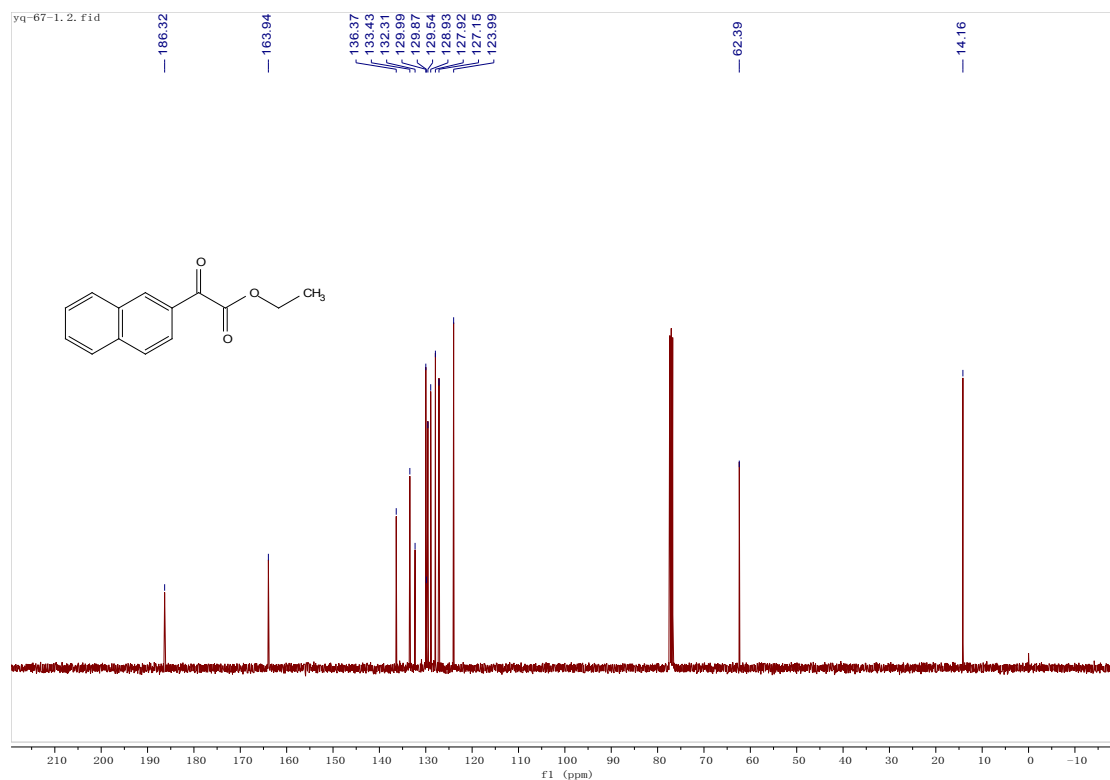

# $^1\text{H}$ and $^{13}\text{C}$ NMR spectra of **3p**

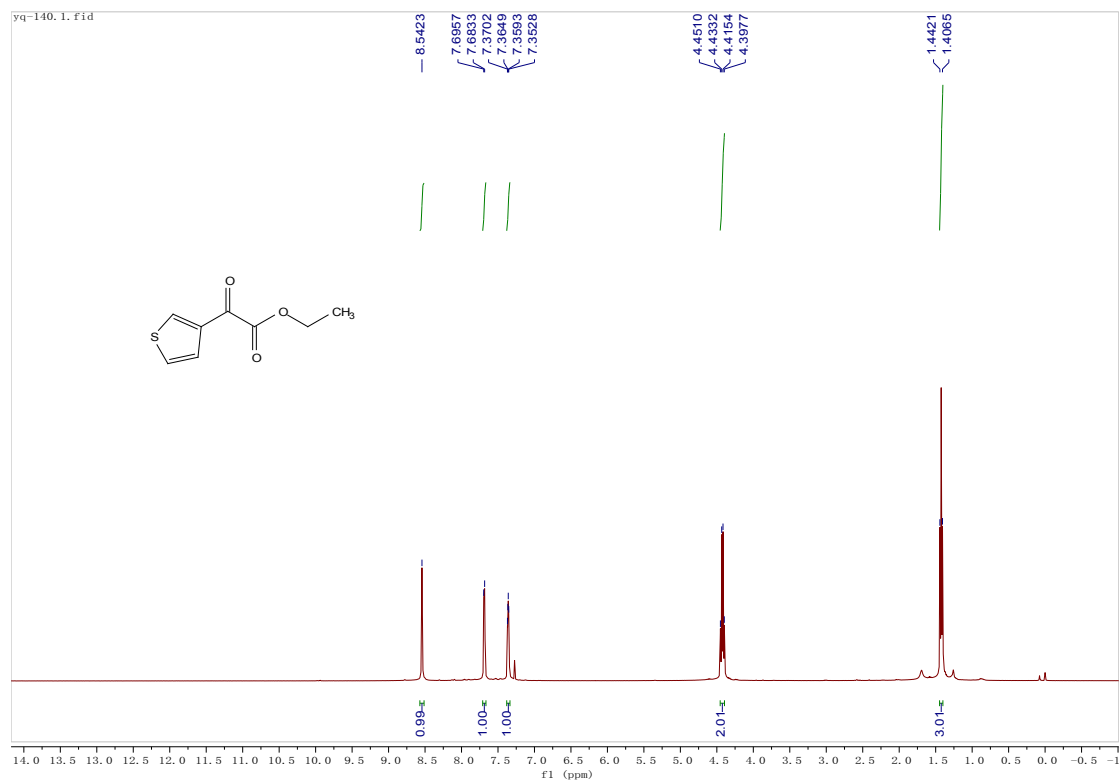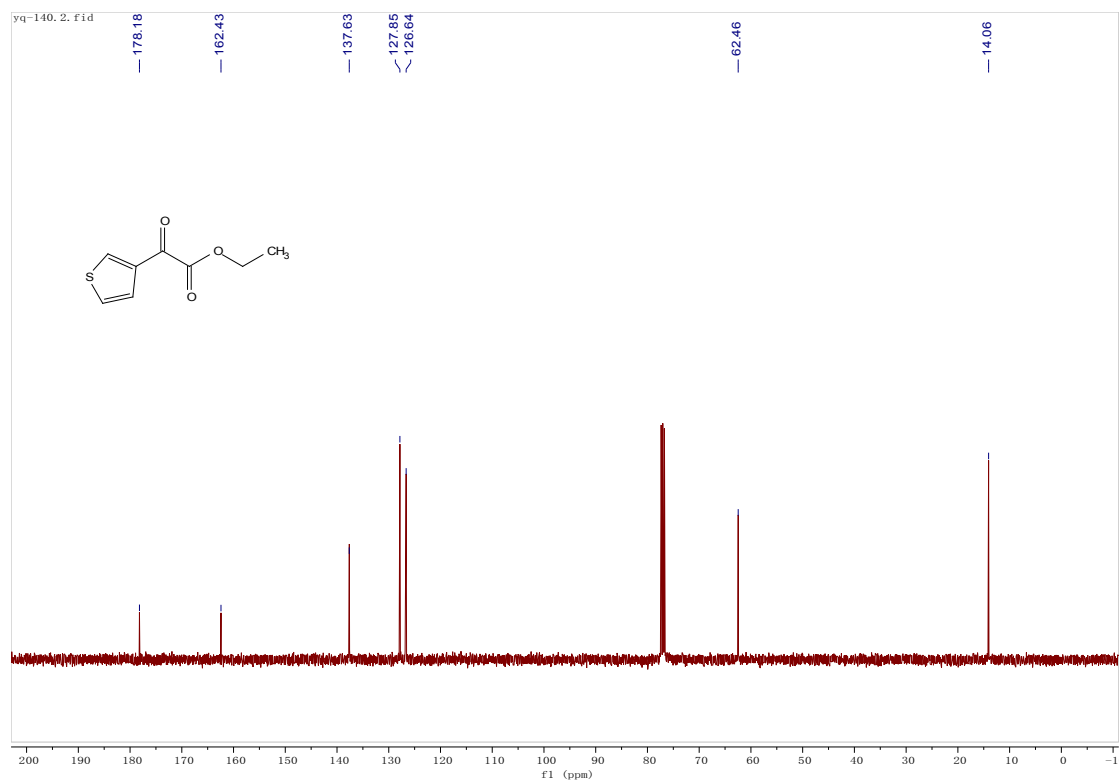

# <sup>1</sup>H and <sup>13</sup>C NMR spectra of 3q

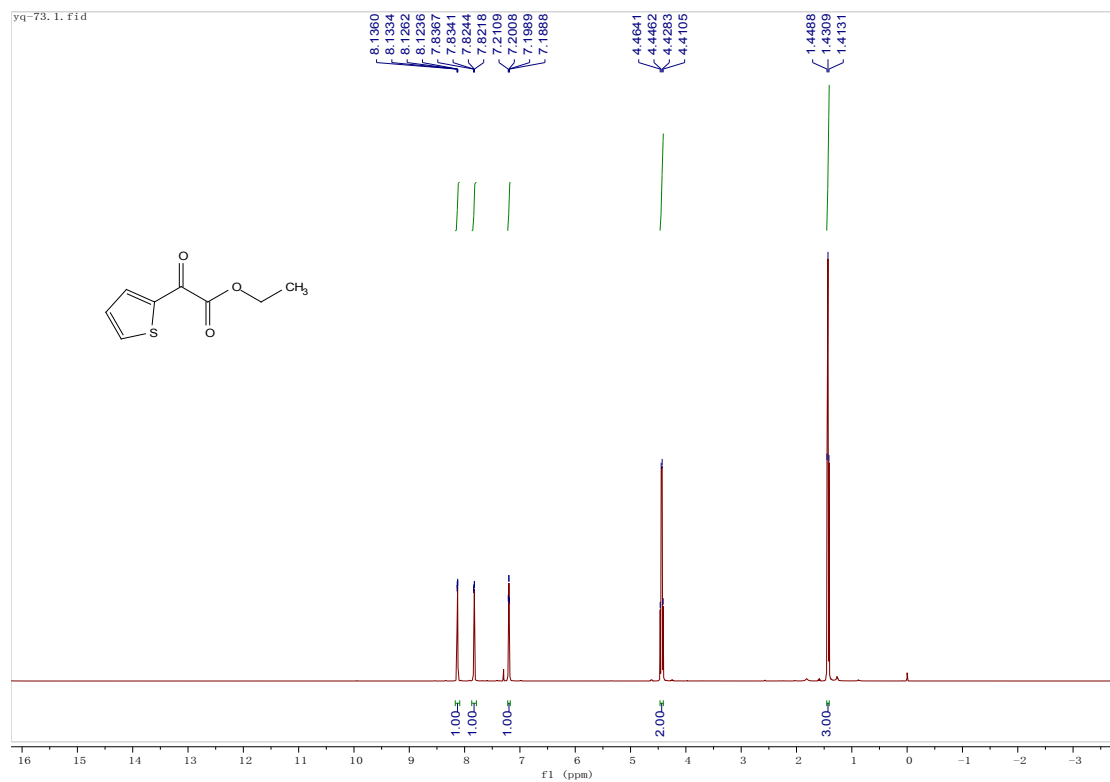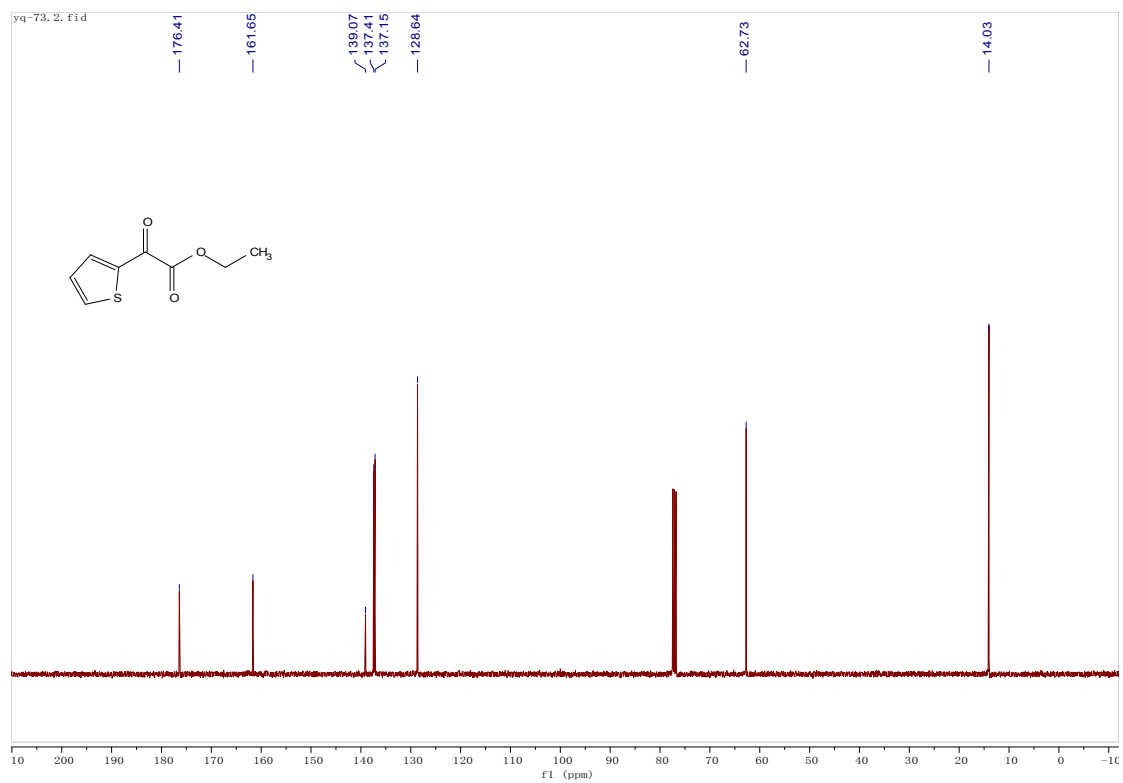

# $^1\text{H}$ and $^{13}\text{C}$ NMR spectra of **3r**

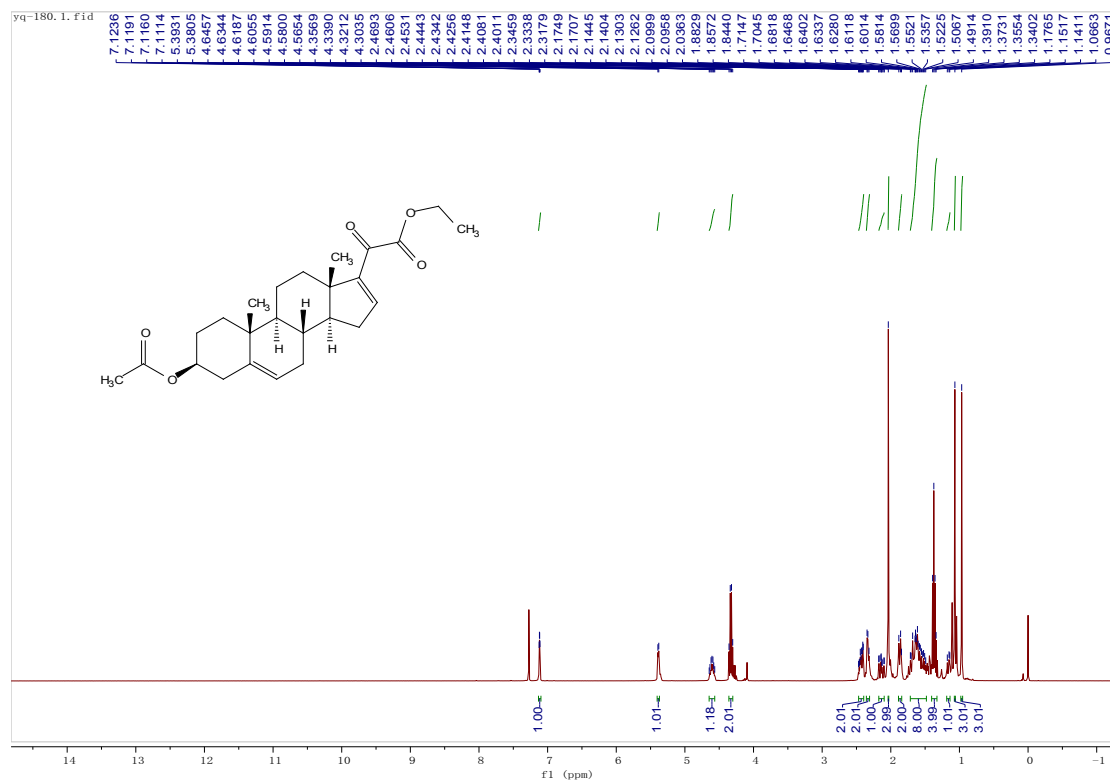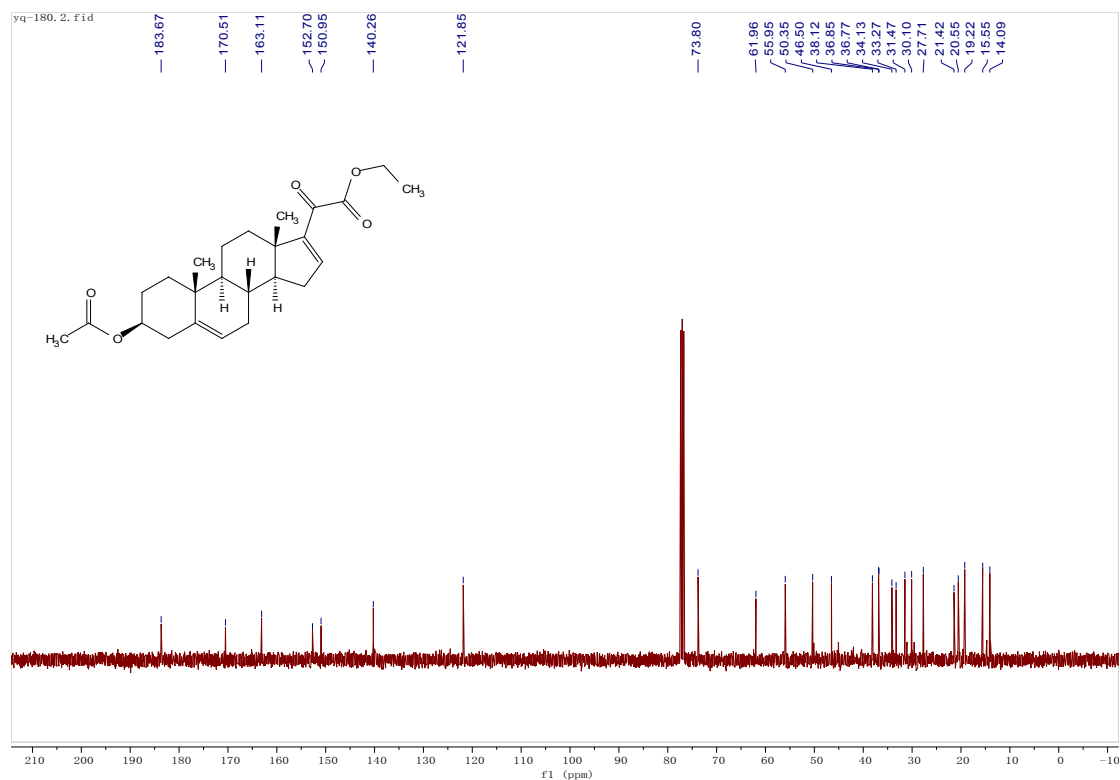

# $^1\text{H}$ and $^{13}\text{C}$ NMR spectra of **3ab**

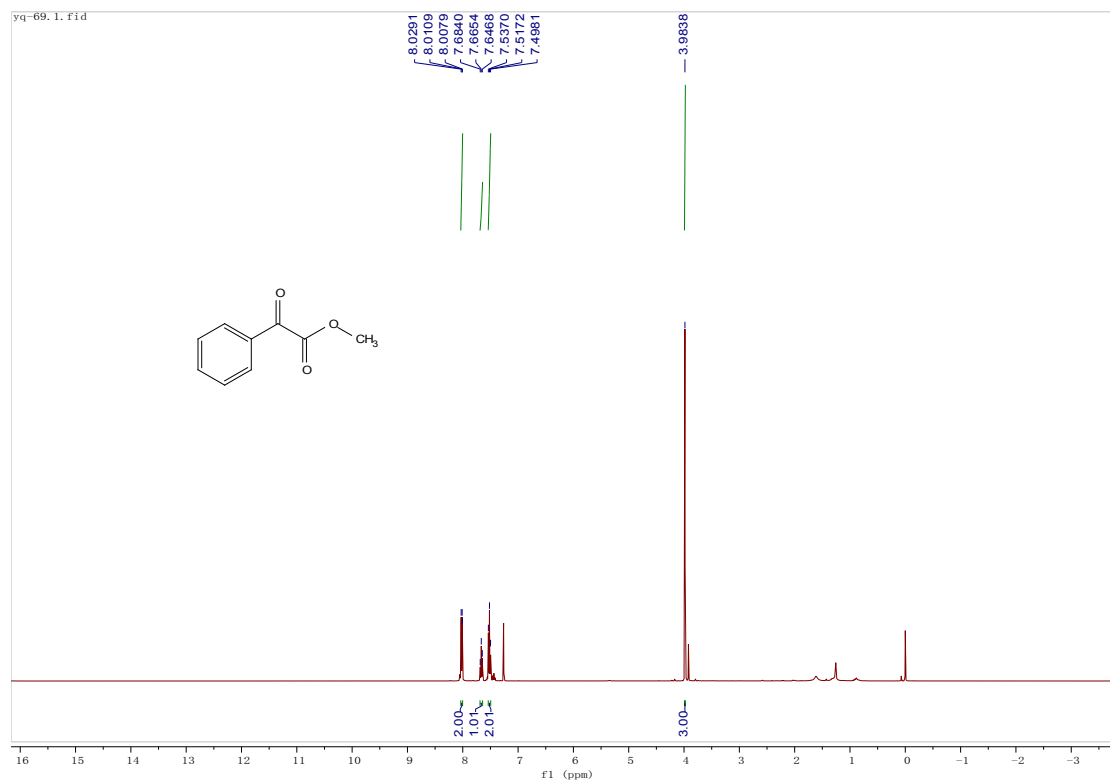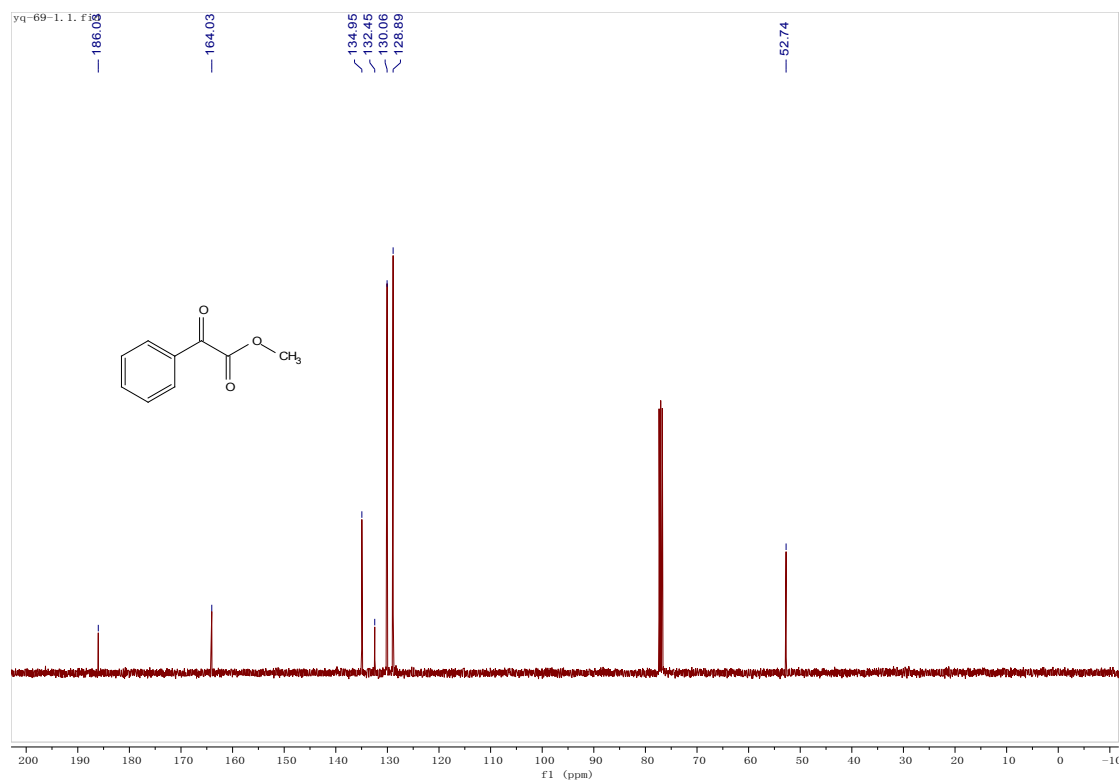

# $^1\text{H}$ and $^{13}\text{C}$ NMR spectra of **3ac**

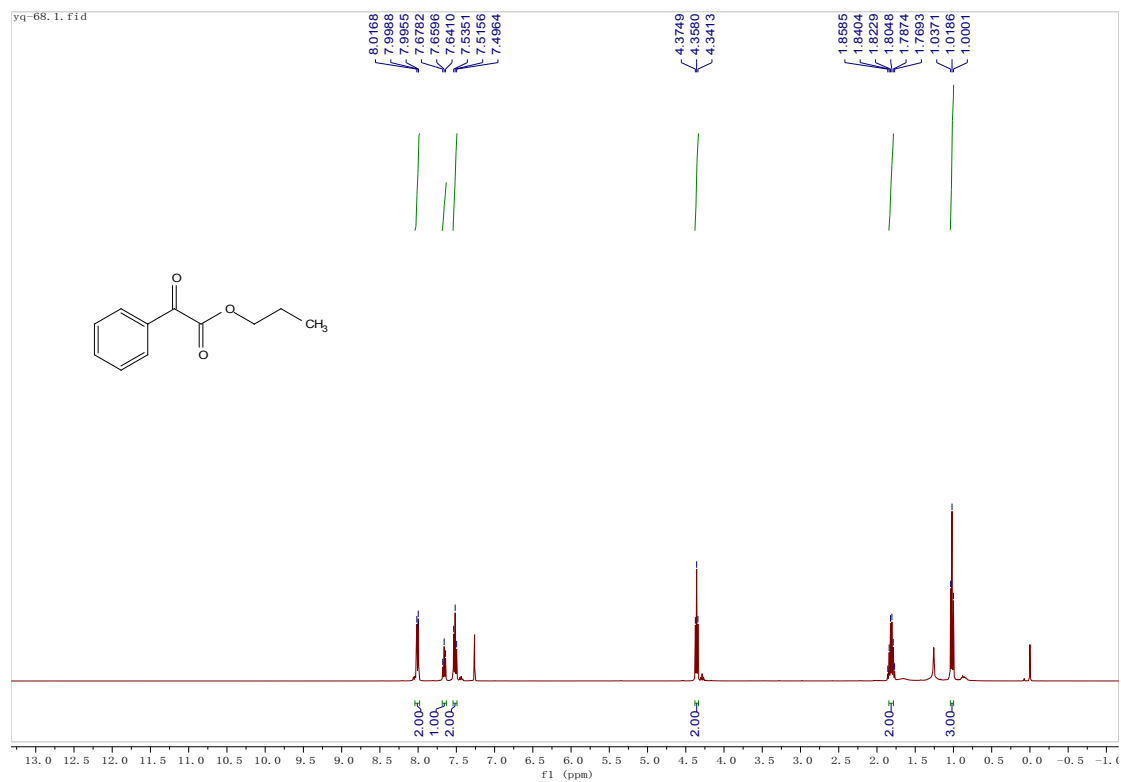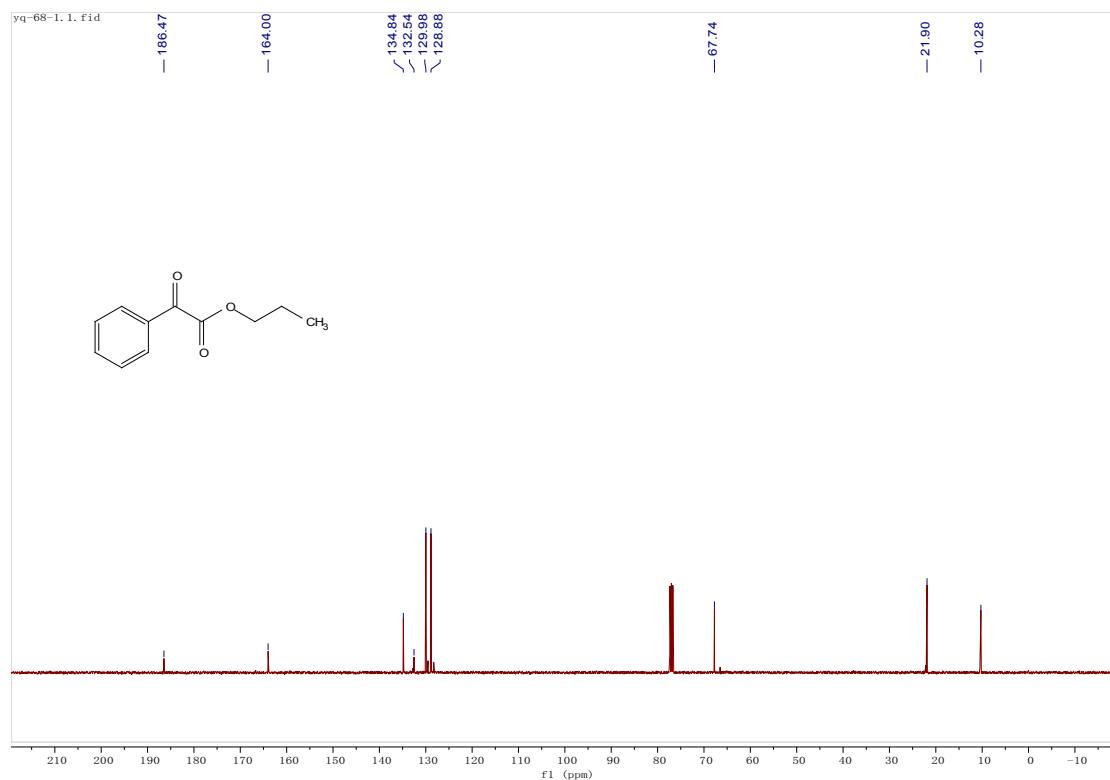

# <sup>1</sup>H and <sup>13</sup>C NMR spectra of 3ad

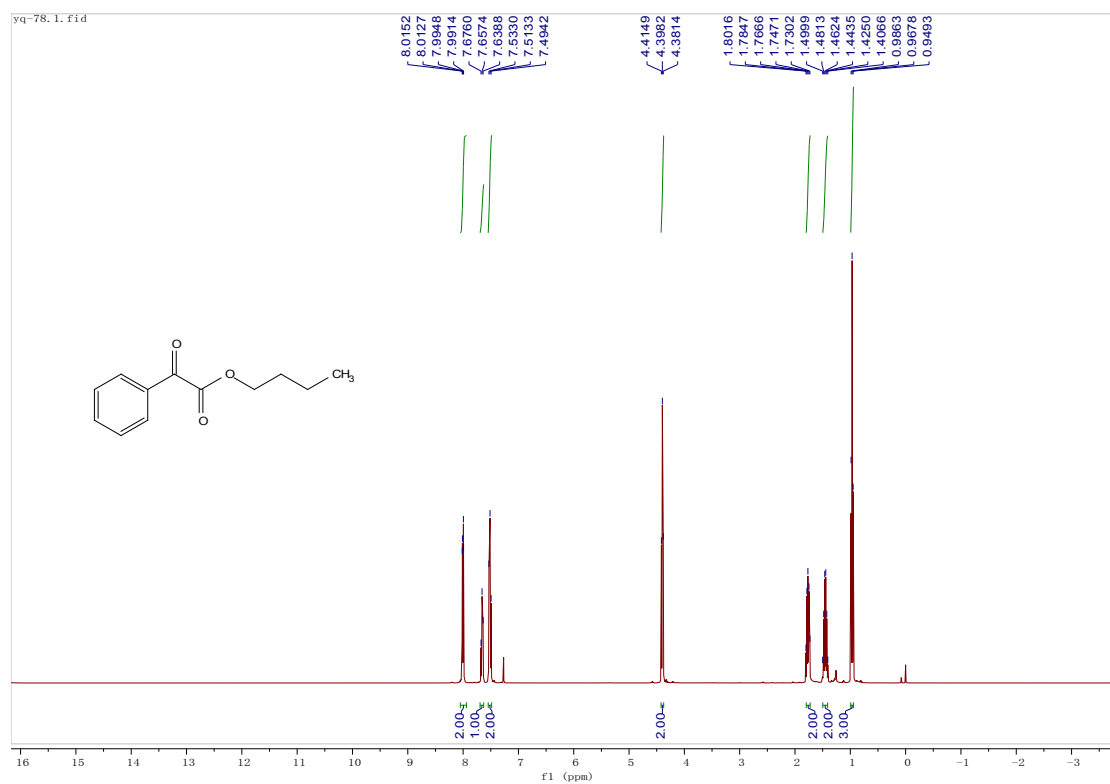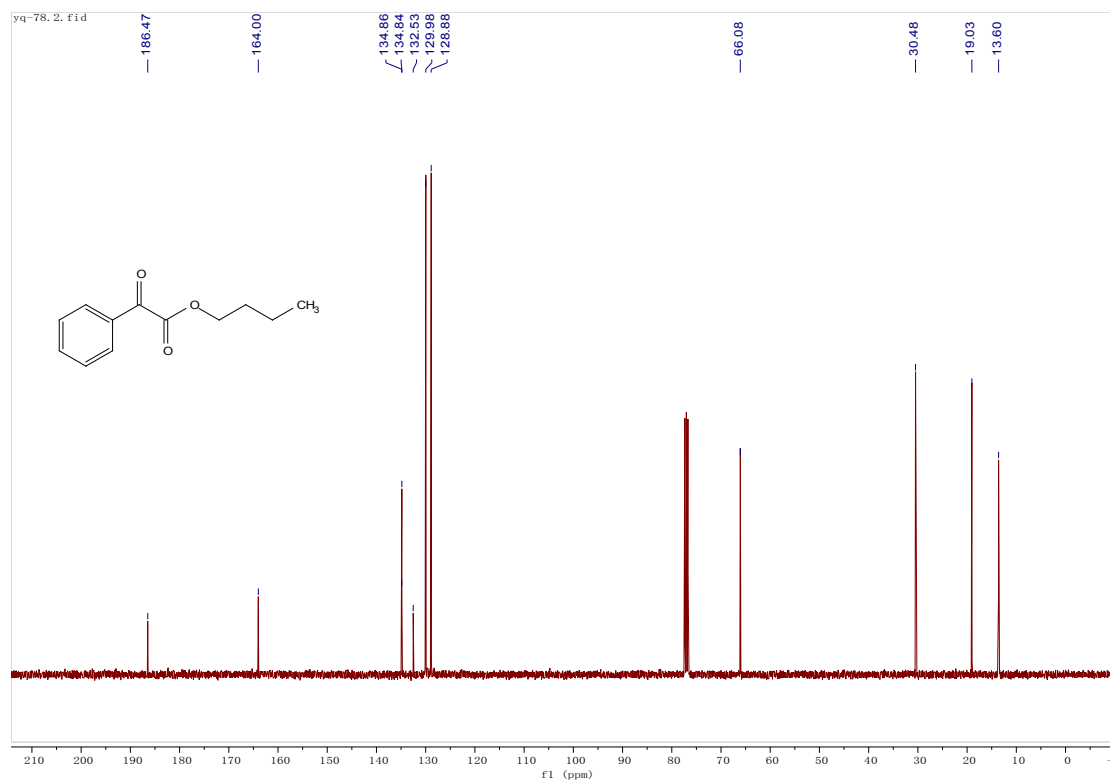

# $^1\text{H}$ and $^{13}\text{C}$ NMR spectra of **3ae**

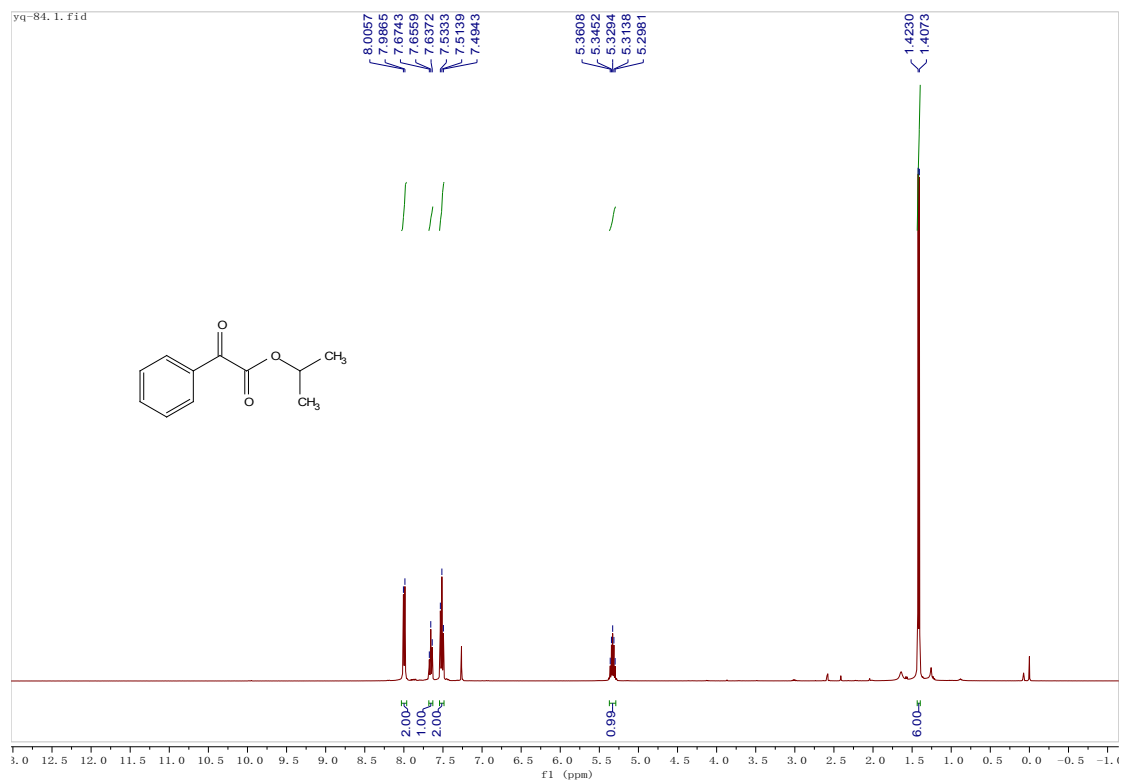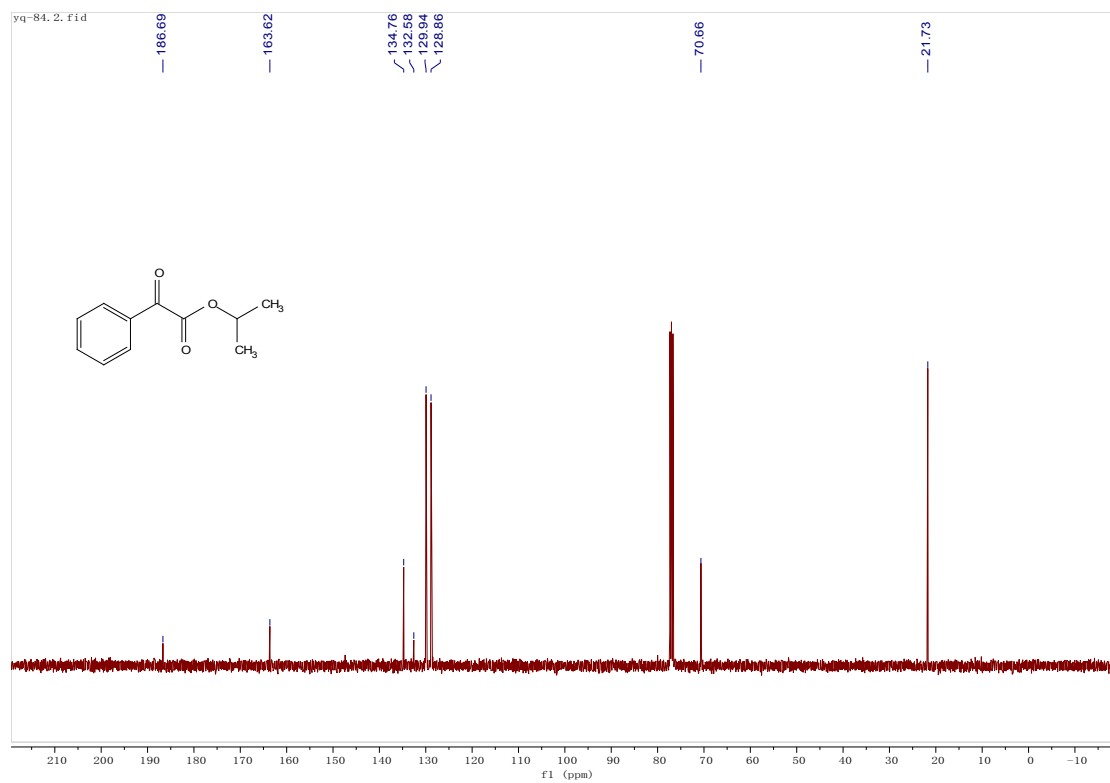



# $^1\text{H}$ and $^{13}\text{C}$ NMR spectra of **3af**

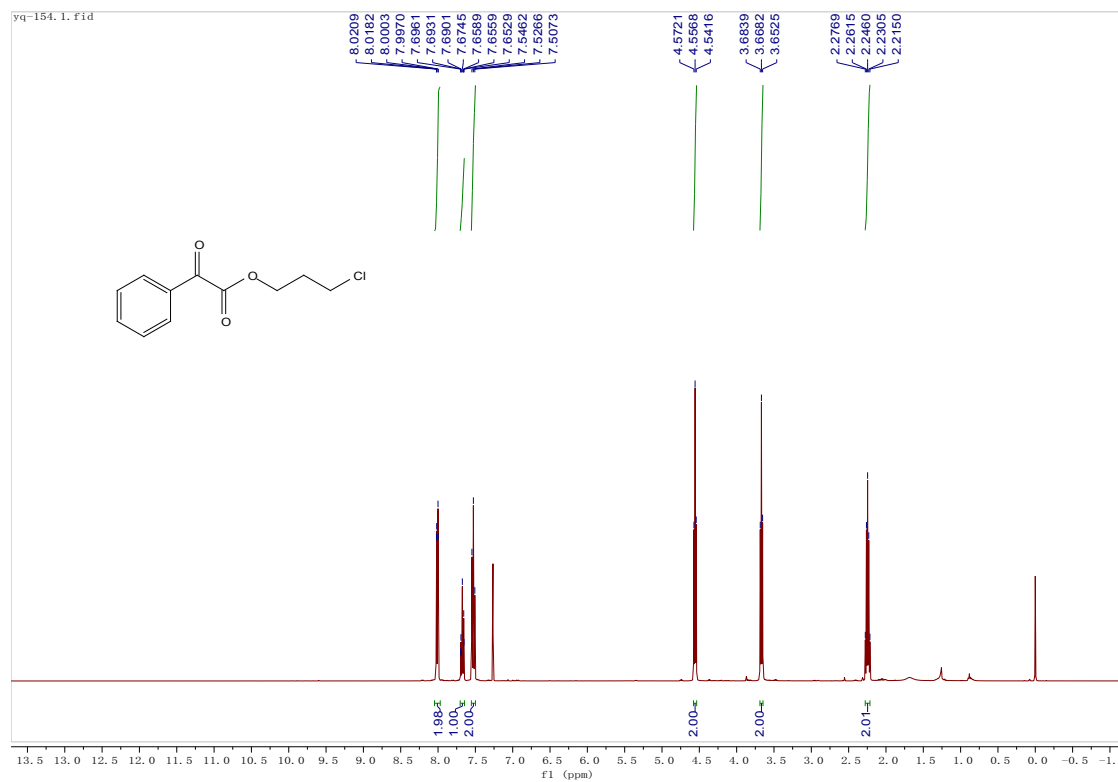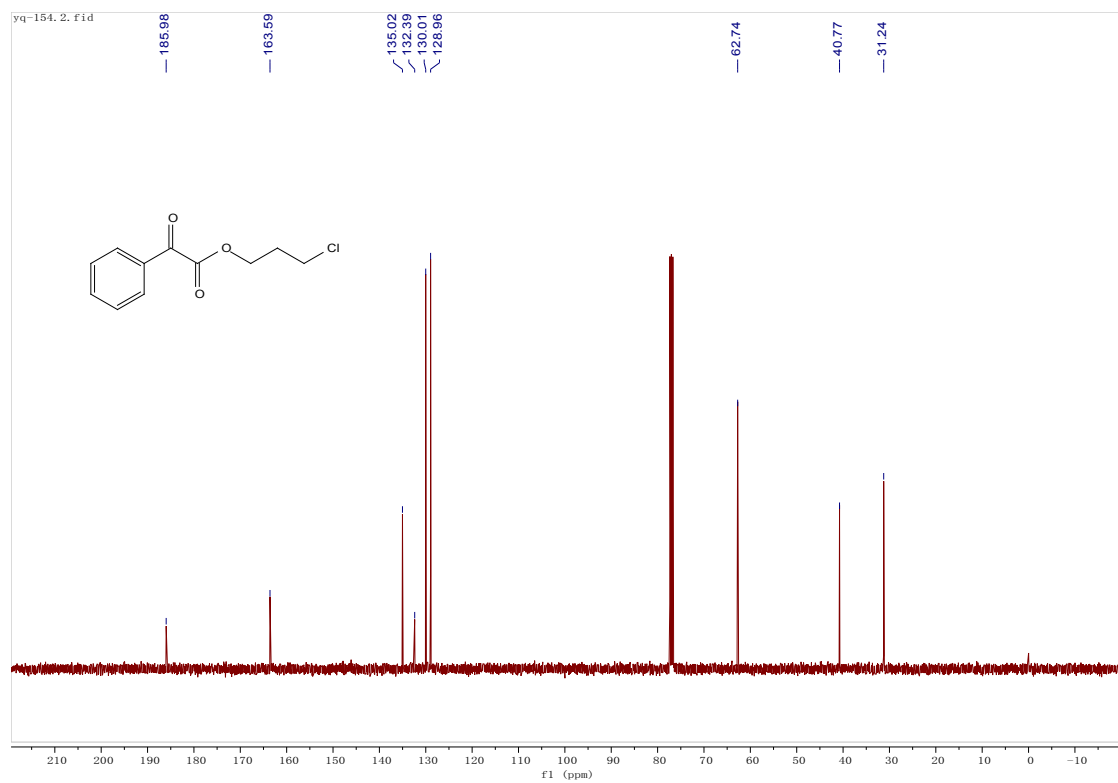

# <sup>1</sup>H and <sup>13</sup>C NMR spectra of **3ag**

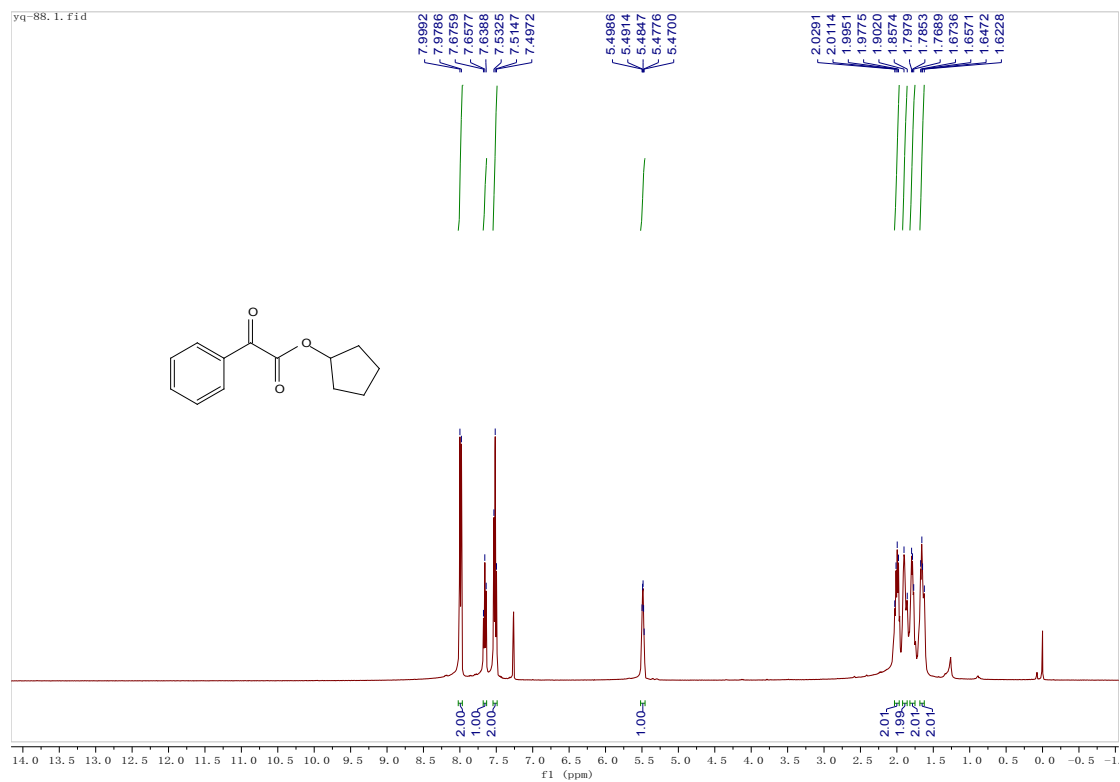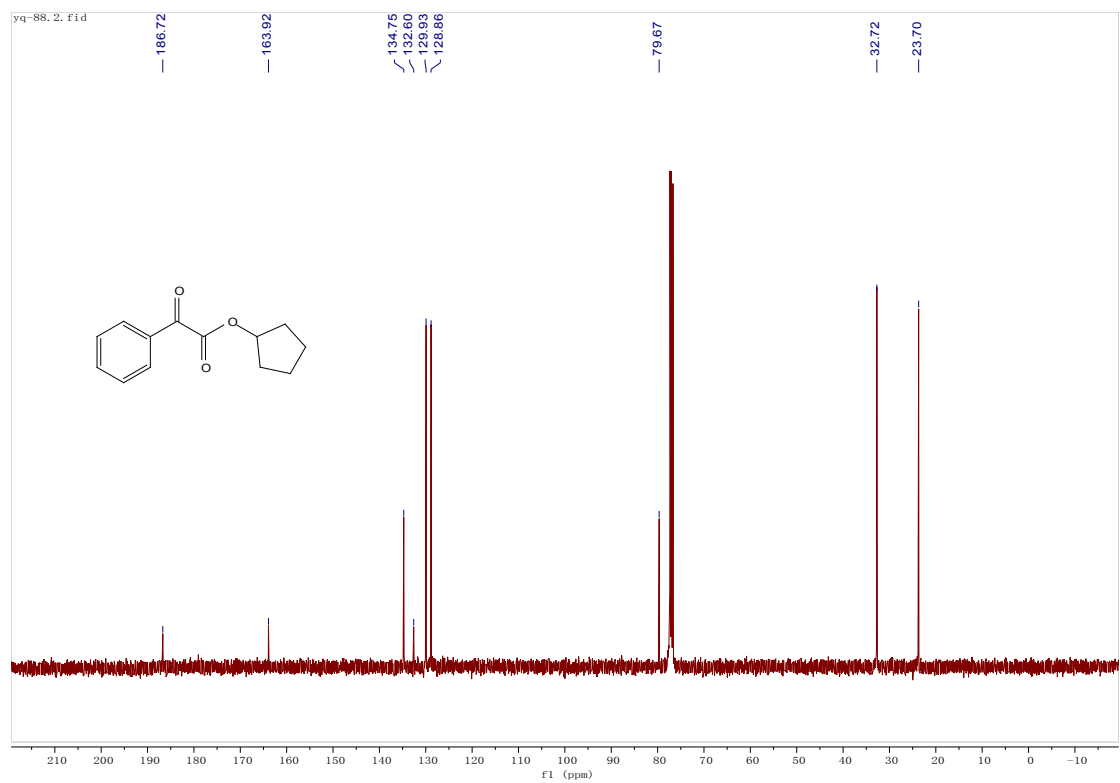

# <sup>1</sup>H and <sup>13</sup>C NMR spectra of **3ah**

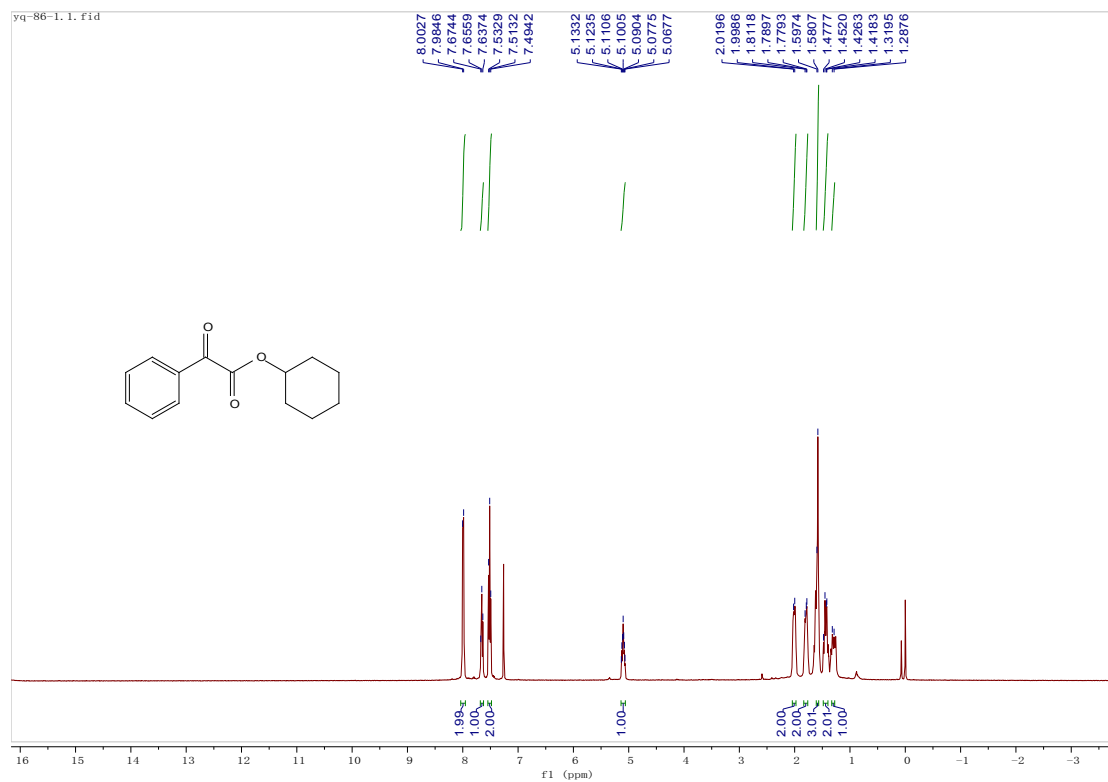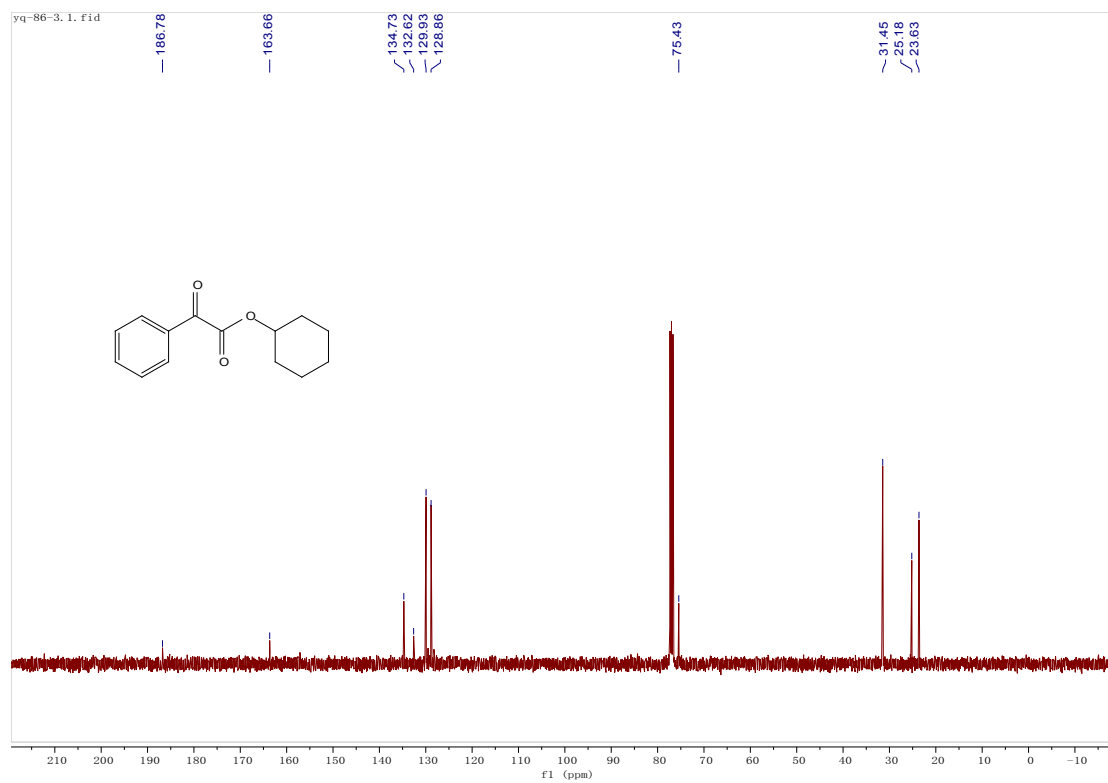

<sup>1</sup>H and <sup>13</sup>C NMR spectra of **3ai**

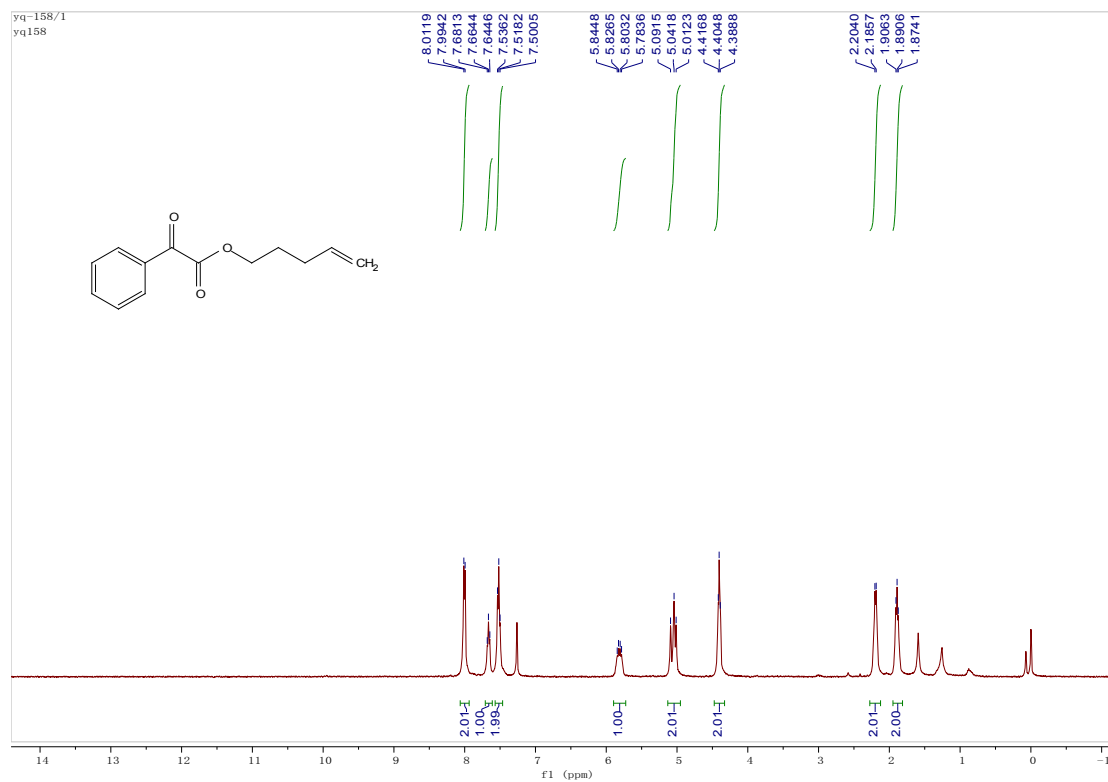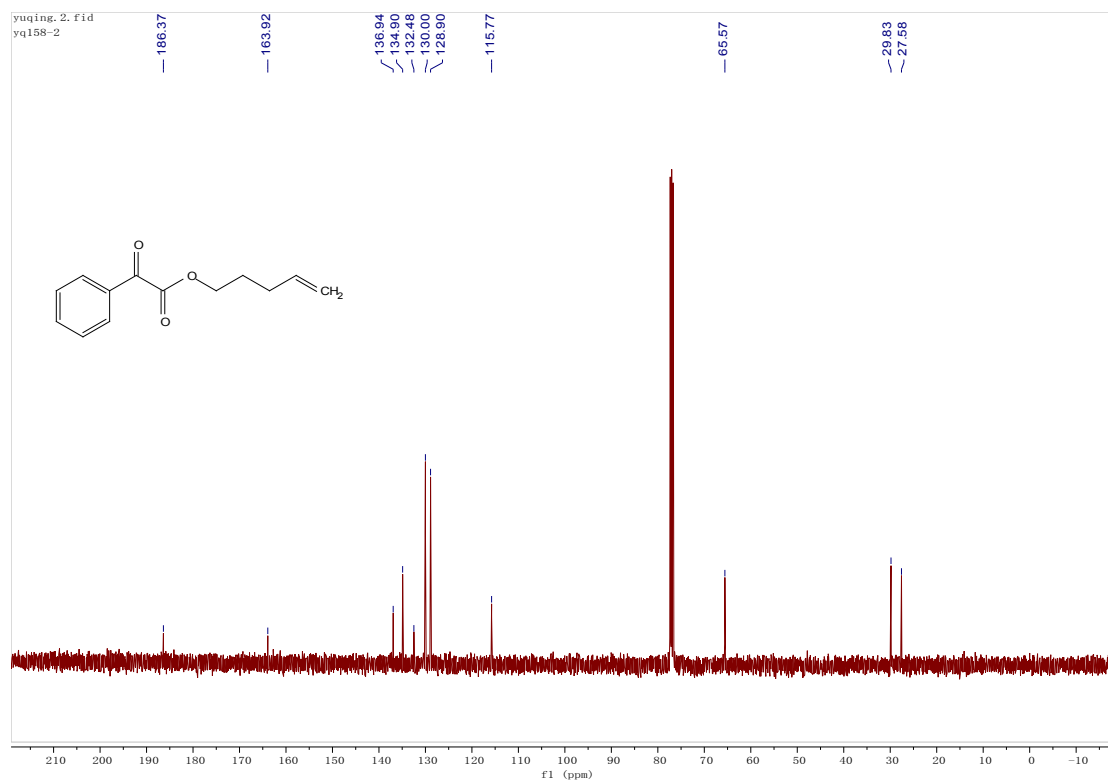

# <sup>1</sup>H and <sup>13</sup>C NMR spectra of 3aj

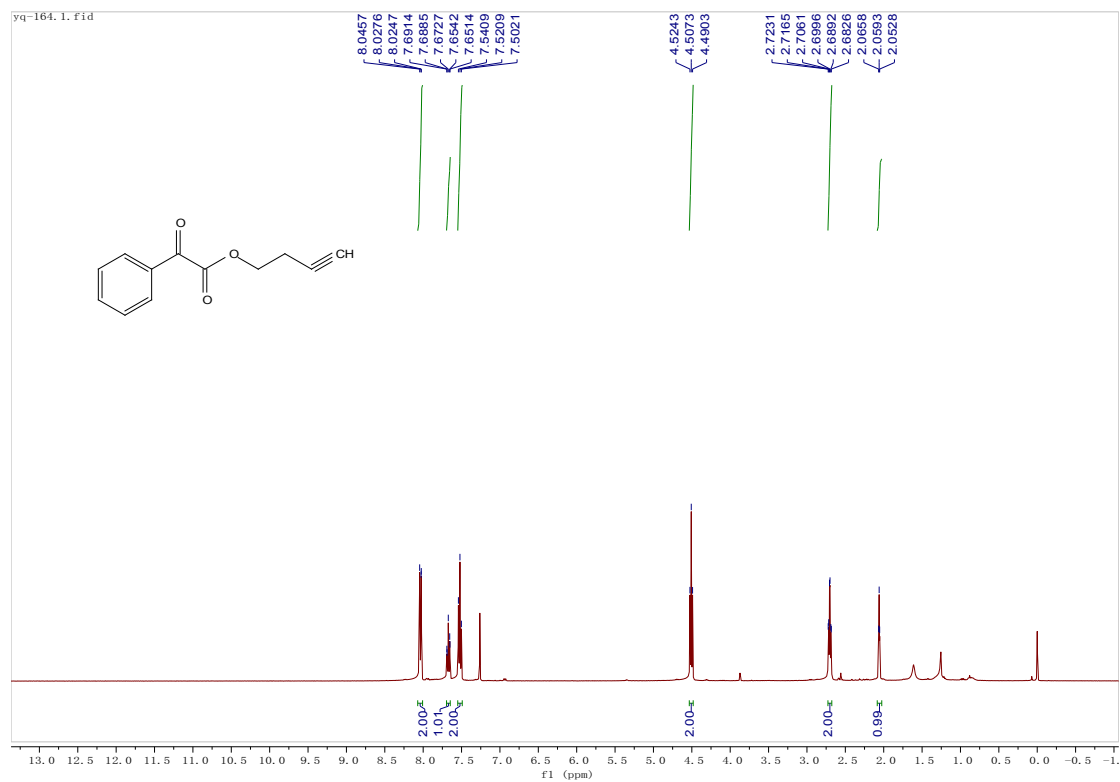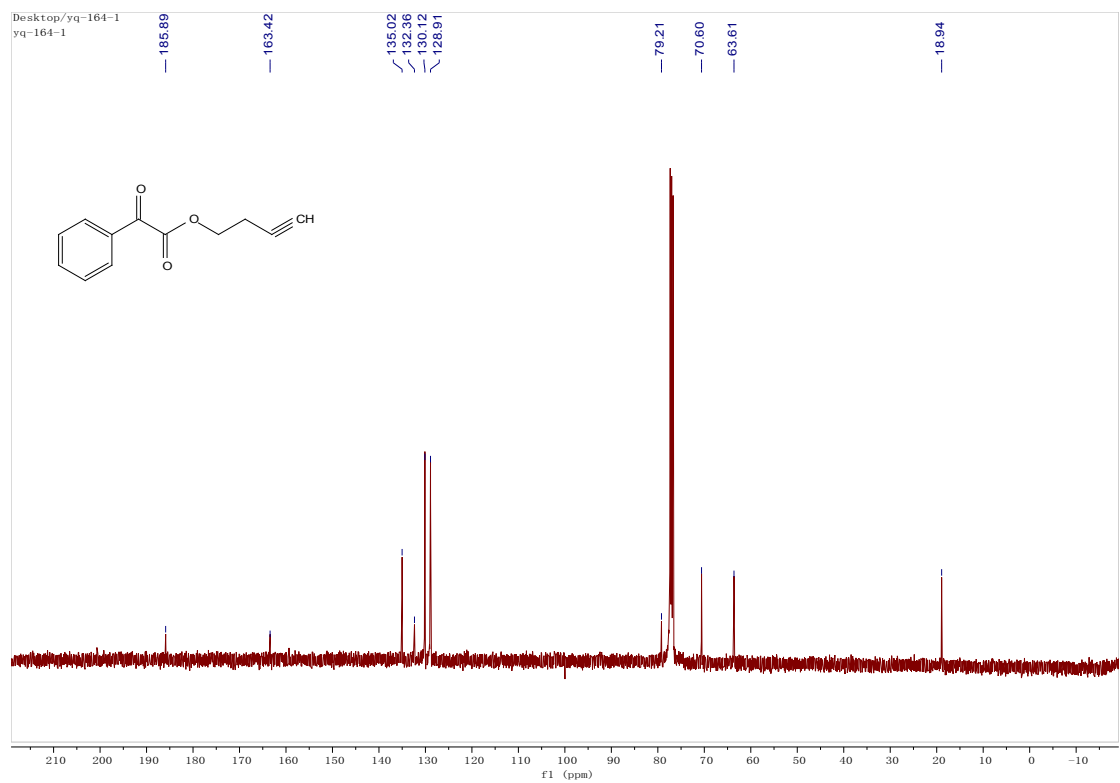

# $^1\text{H}$ and $^{13}\text{C}$ NMR spectra of **3ak**

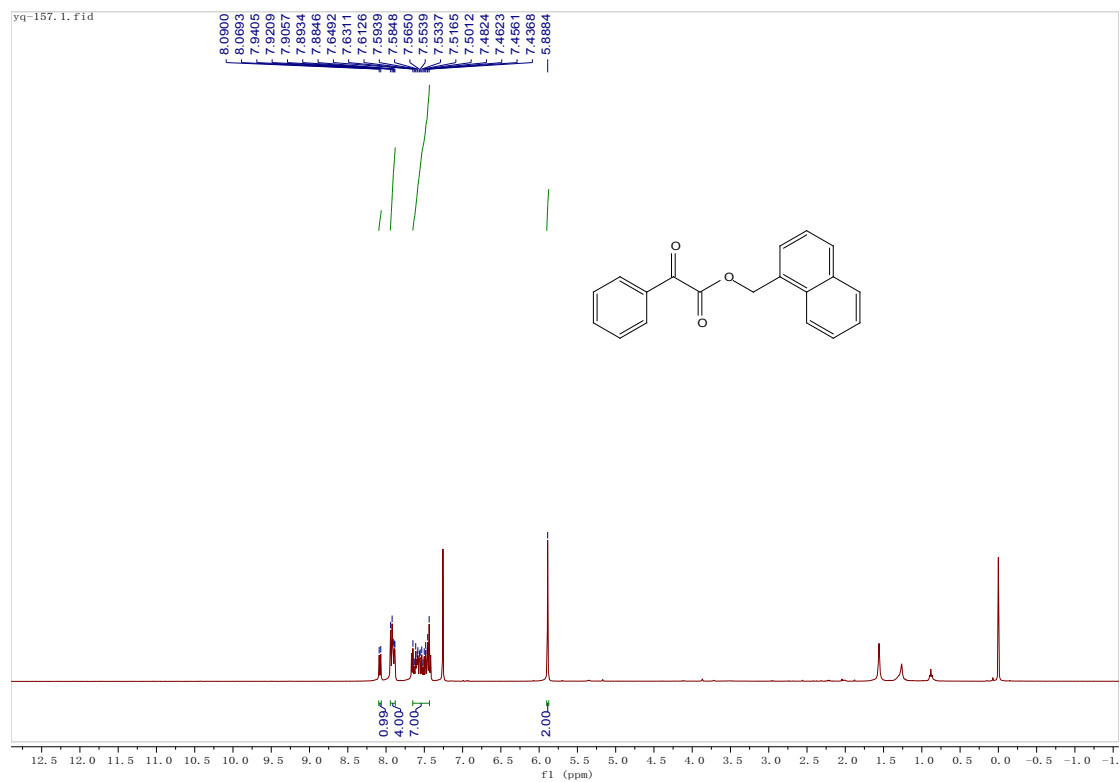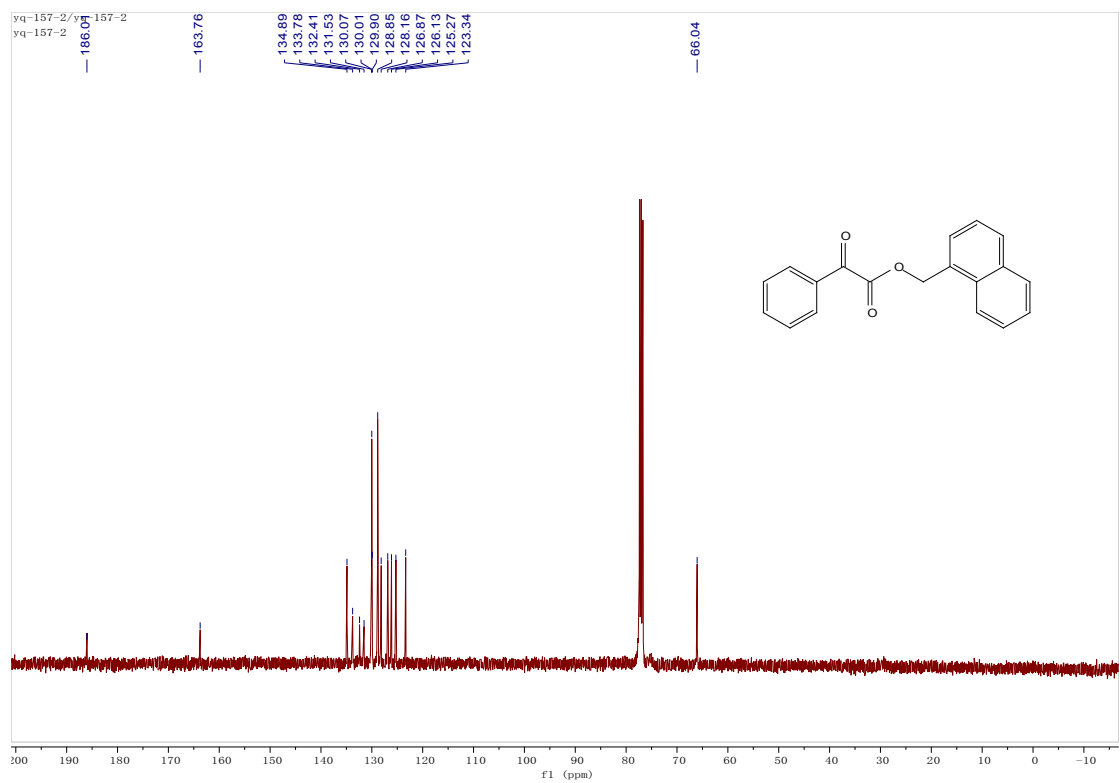

# <sup>1</sup>H and <sup>13</sup>C NMR spectra of **3al**

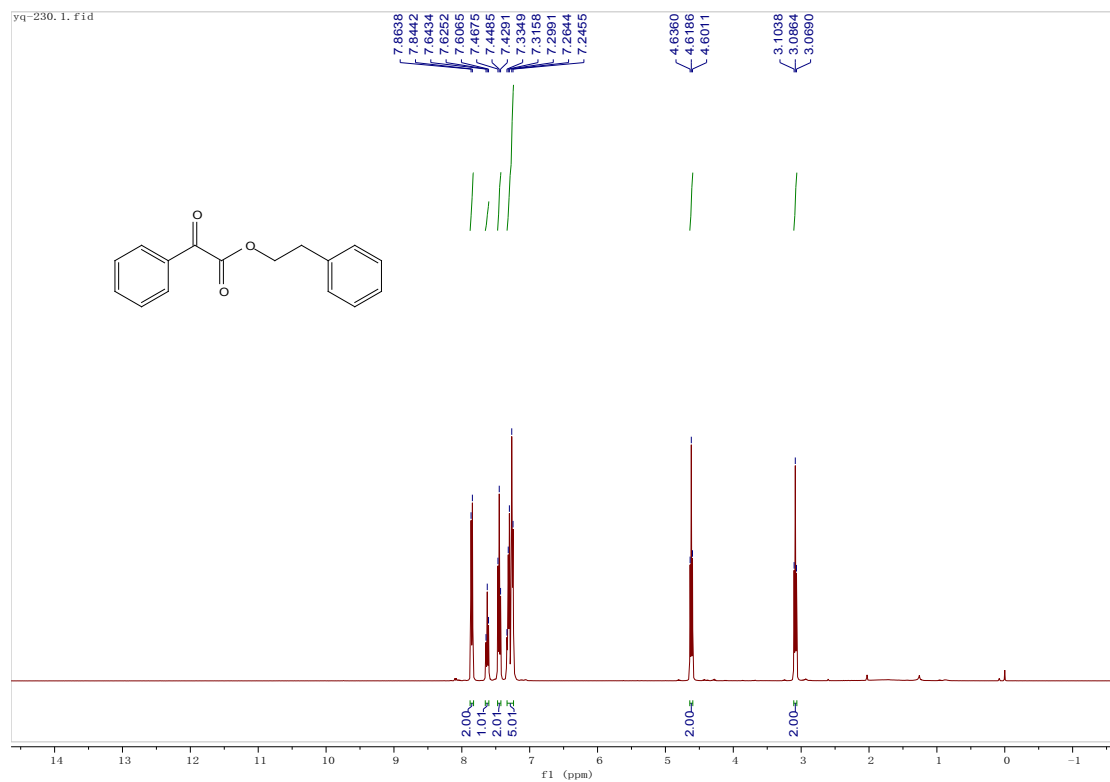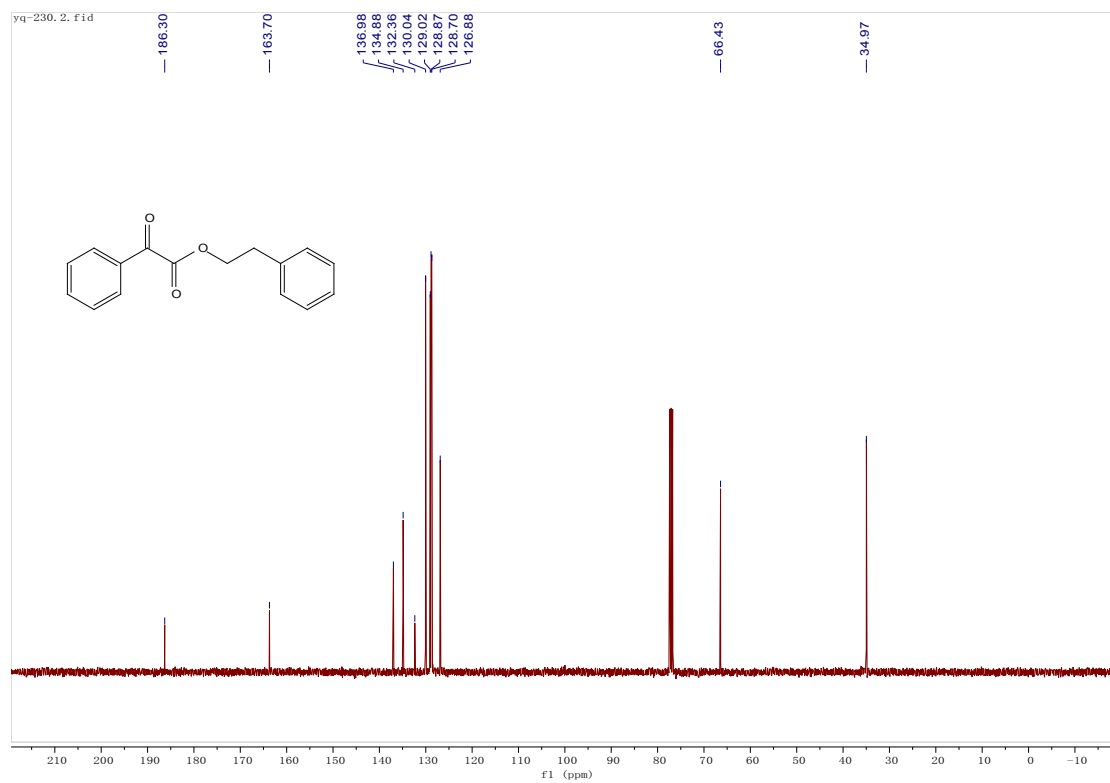

# $^1\text{H}$ and $^{13}\text{C}$ NMR spectra of **3am**

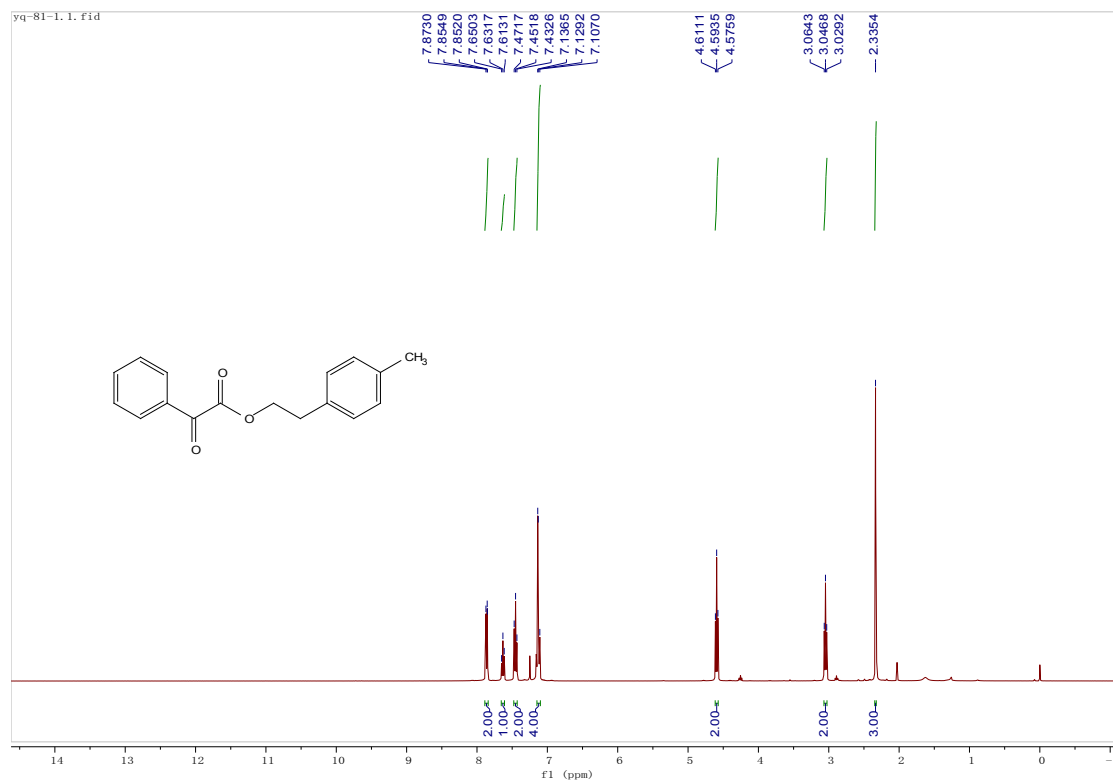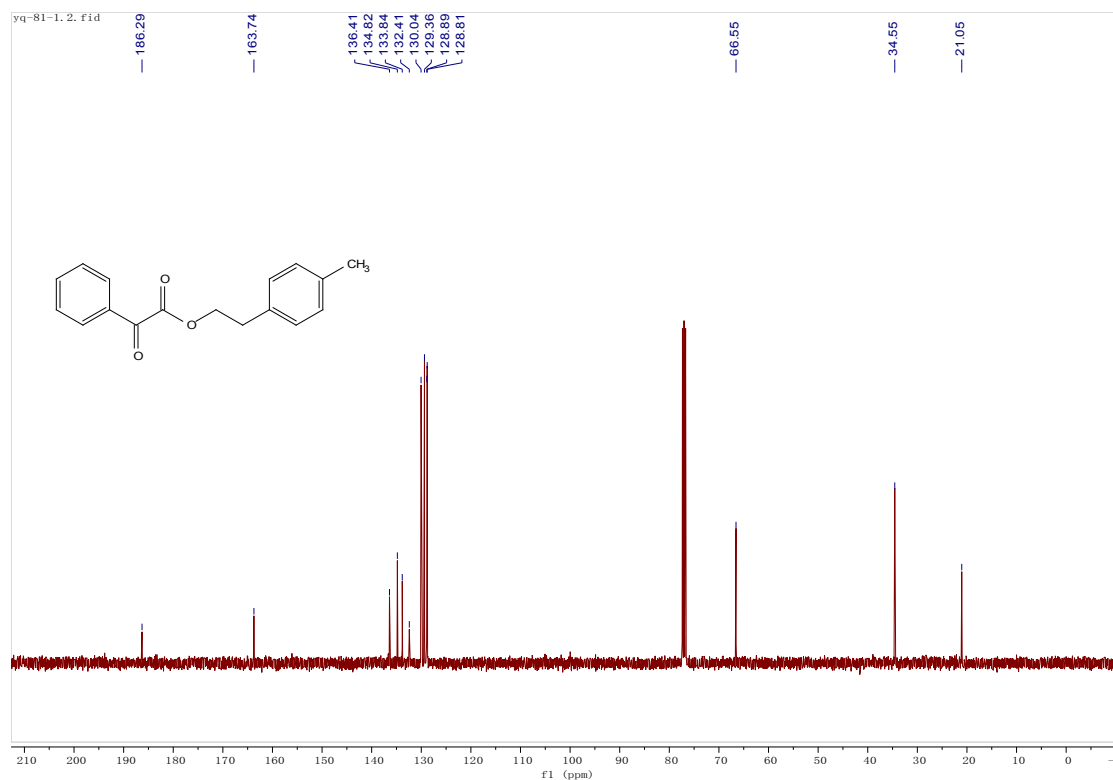





# $^1\text{H}$ and $^{13}\text{C}$ NMR spectra of **3ao**

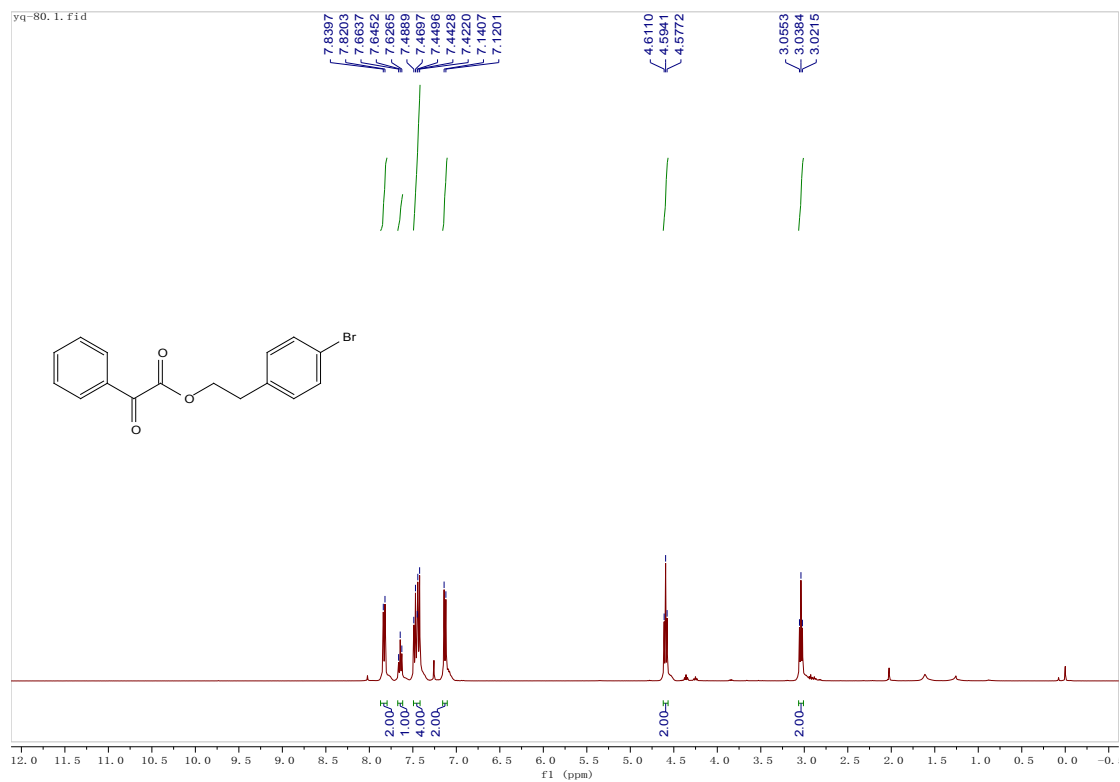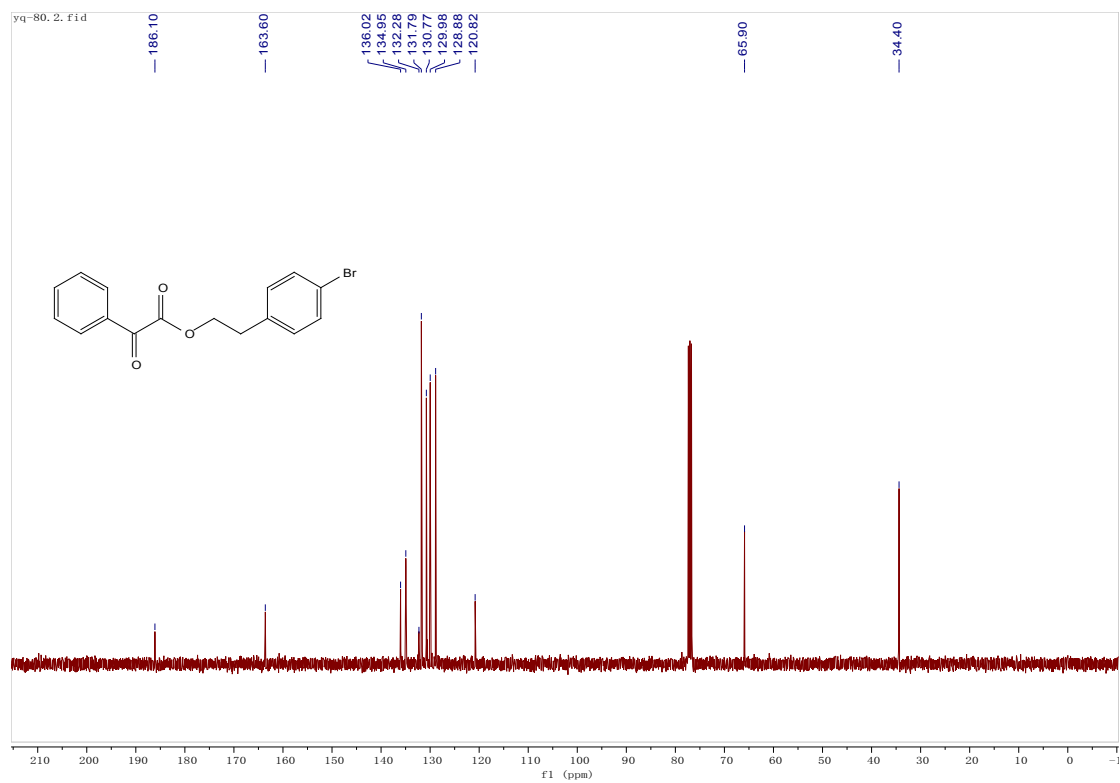

# $^1\text{H}$ and $^{13}\text{C}$ NMR spectra of **3ap**

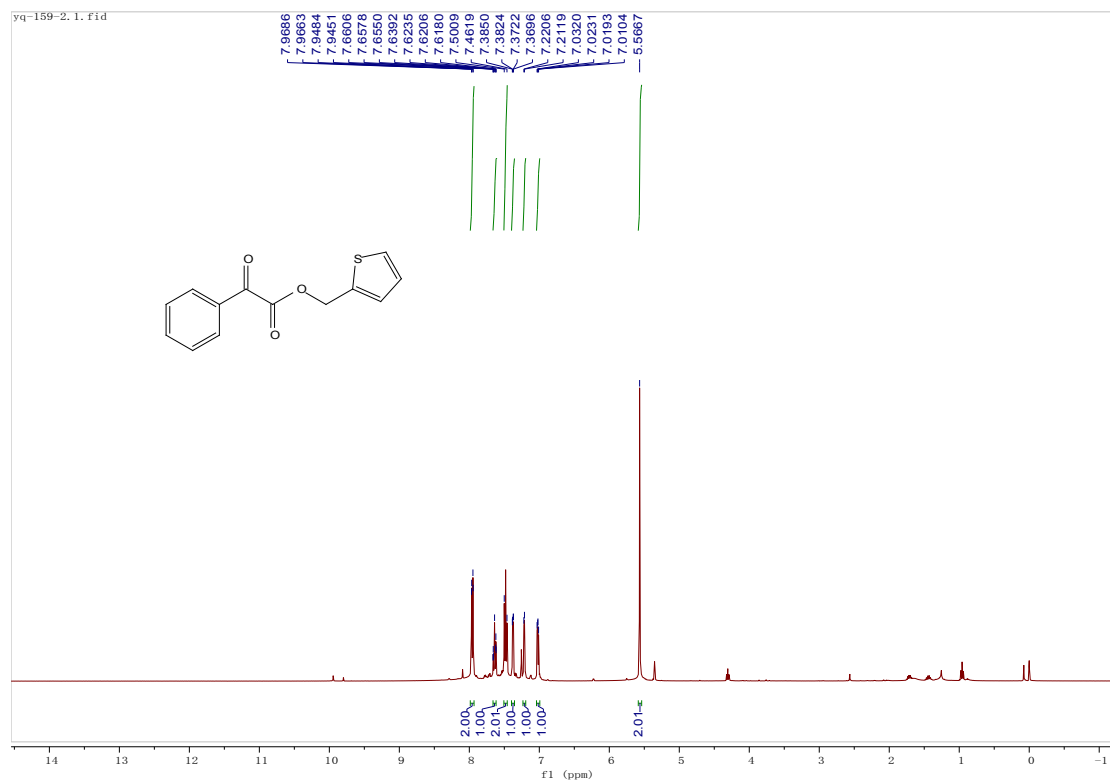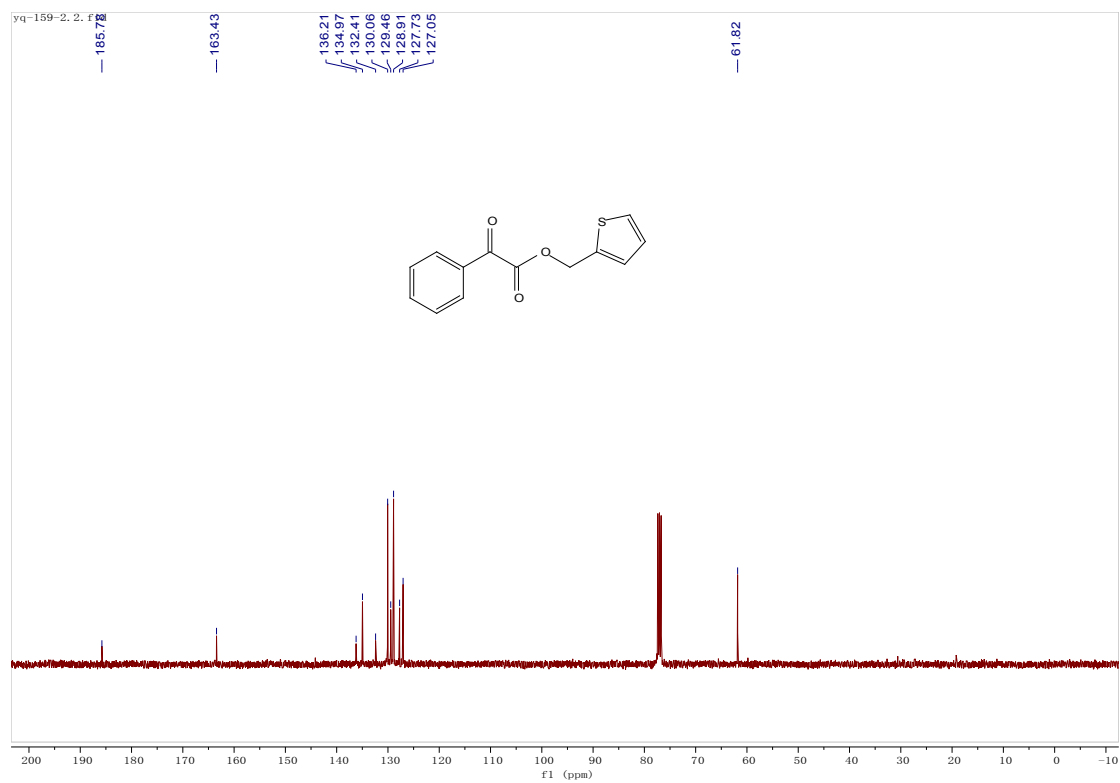

# $^1\text{H}$ and $^{13}\text{C}$ NMR spectra of **3aq**

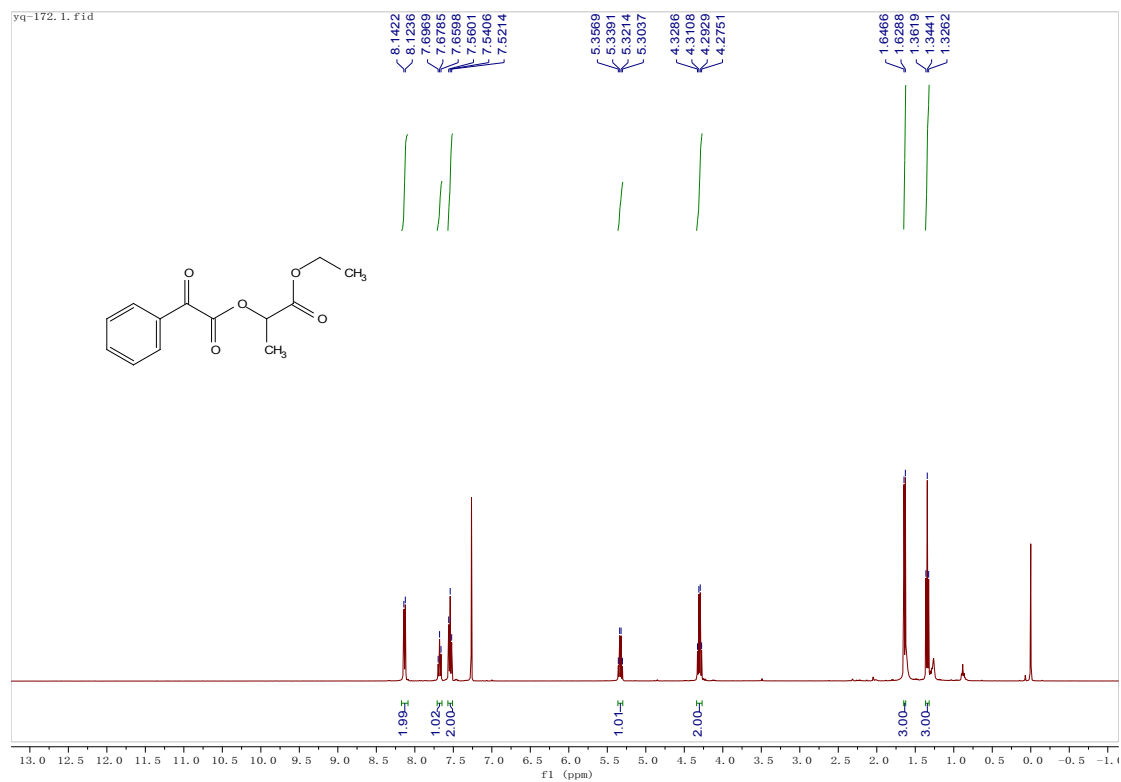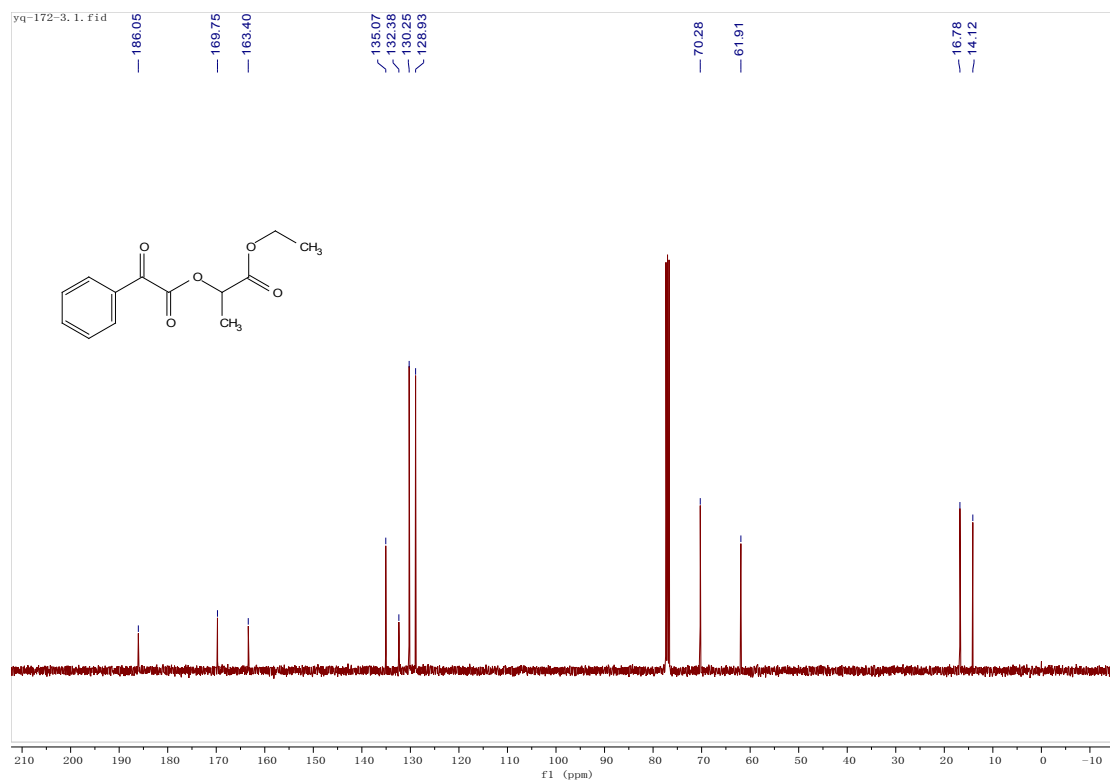

# $^1\text{H}$ and $^{13}\text{C}$ NMR spectra of **3ar**

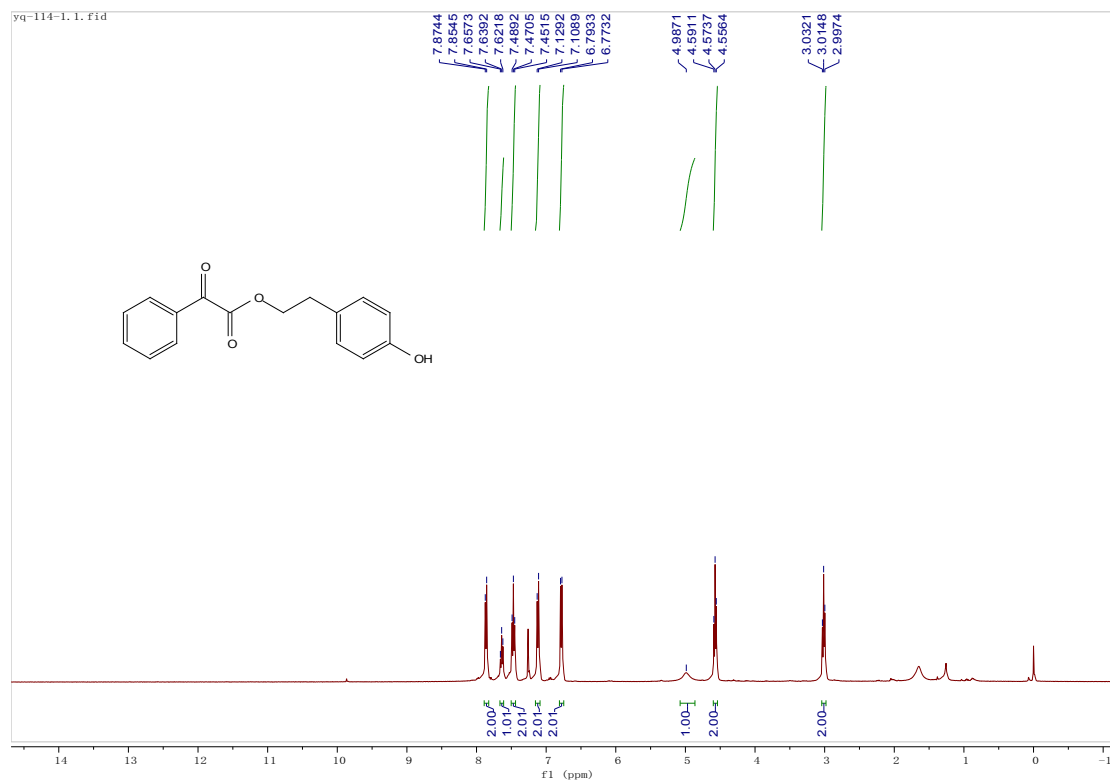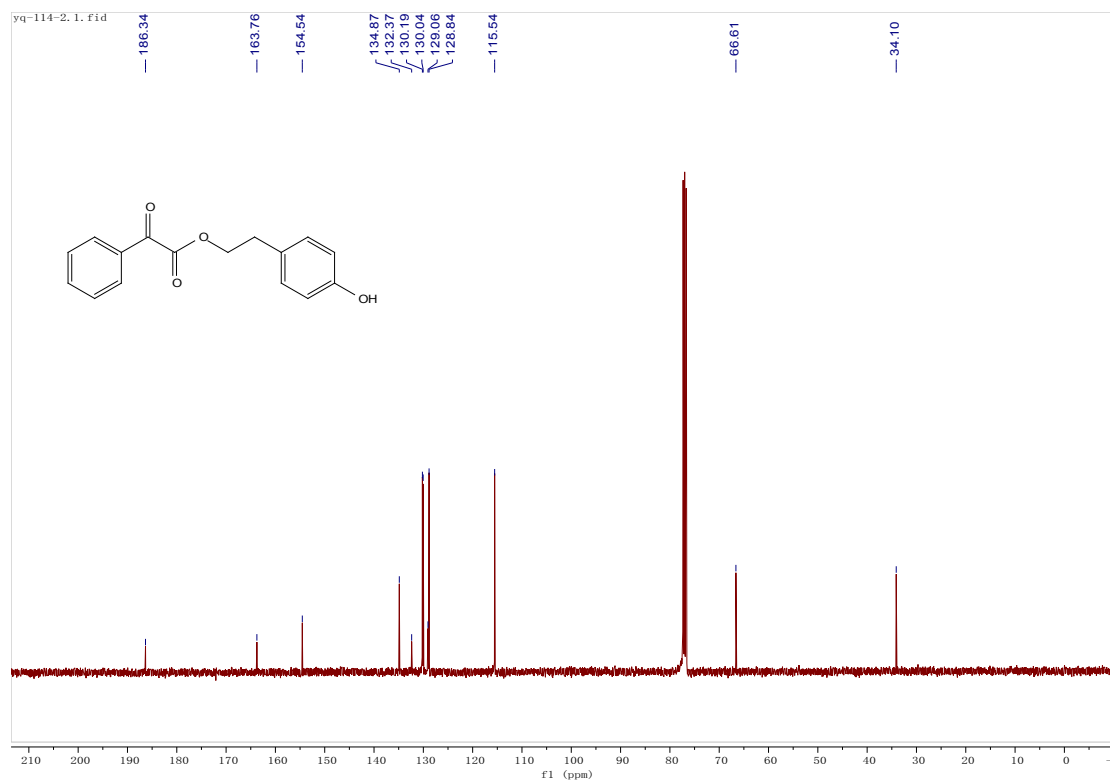

# $^1\text{H}$ and $^{13}\text{C}$ NMR spectra of **3as**

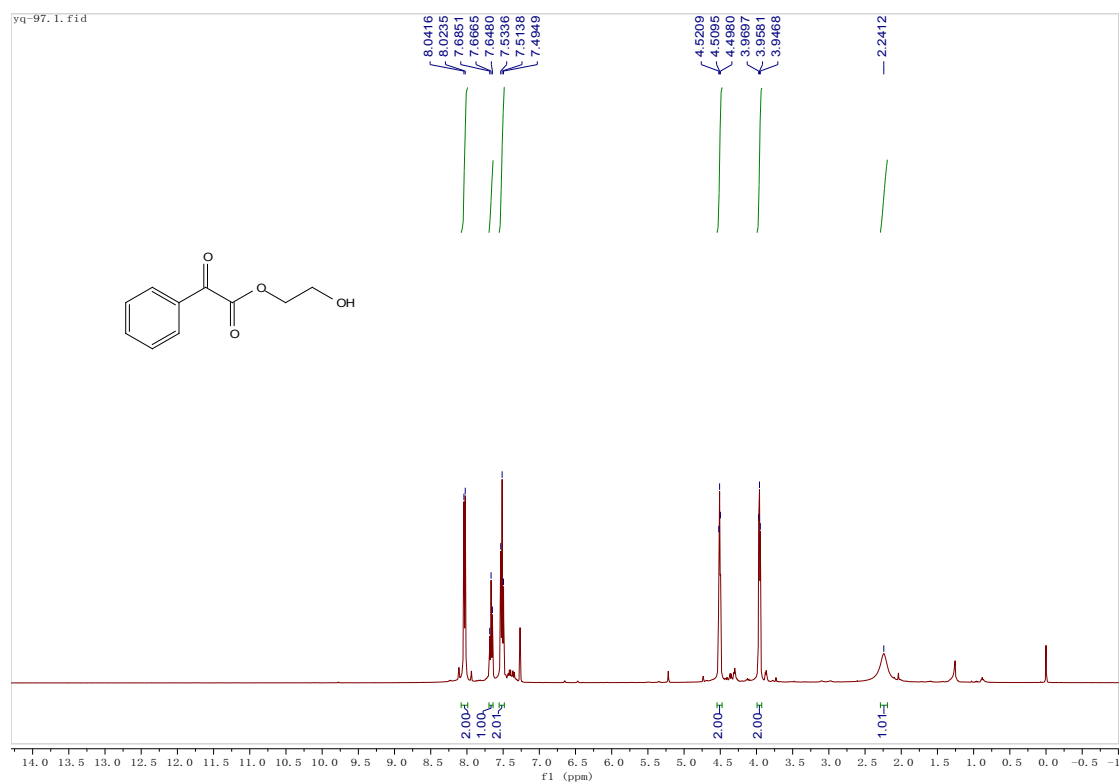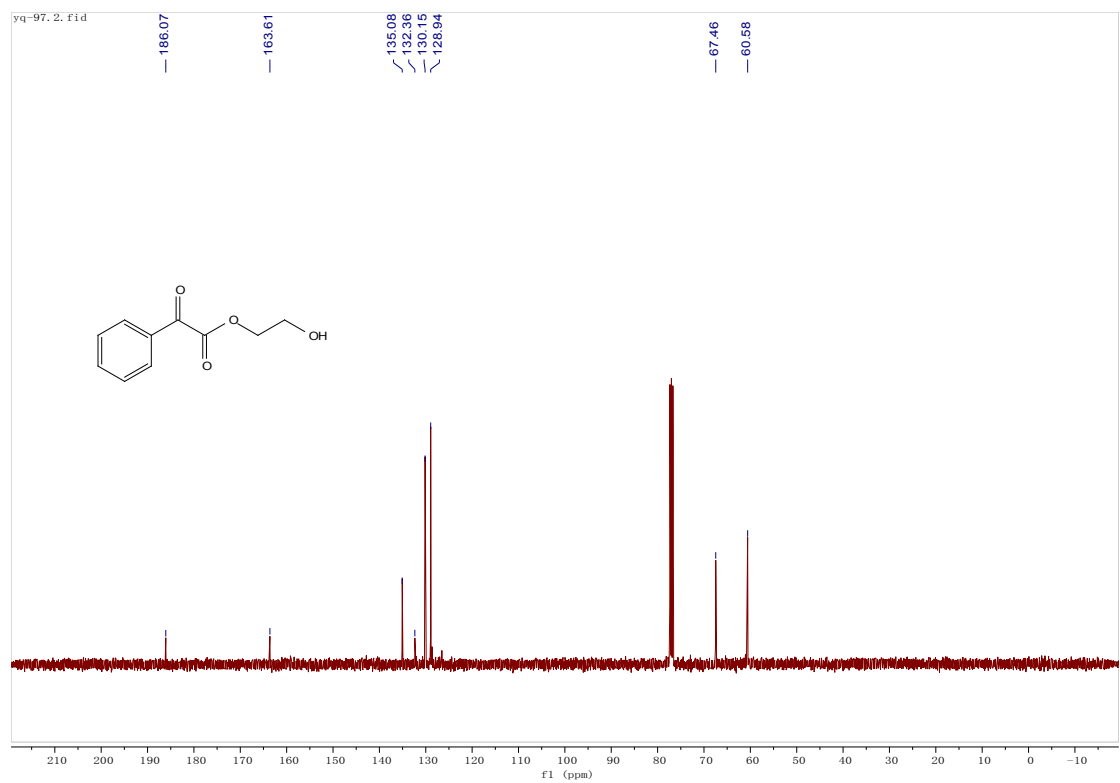

# $^1\text{H}$ and $^{13}\text{C}$ NMR spectra of **3at**

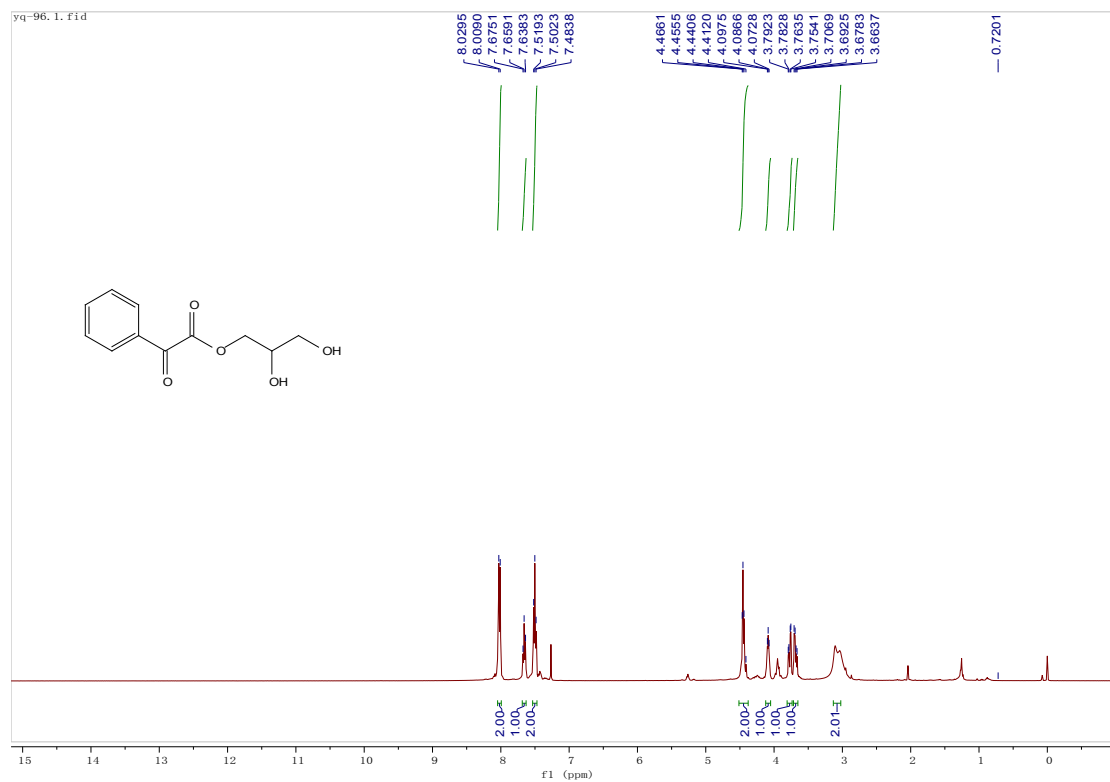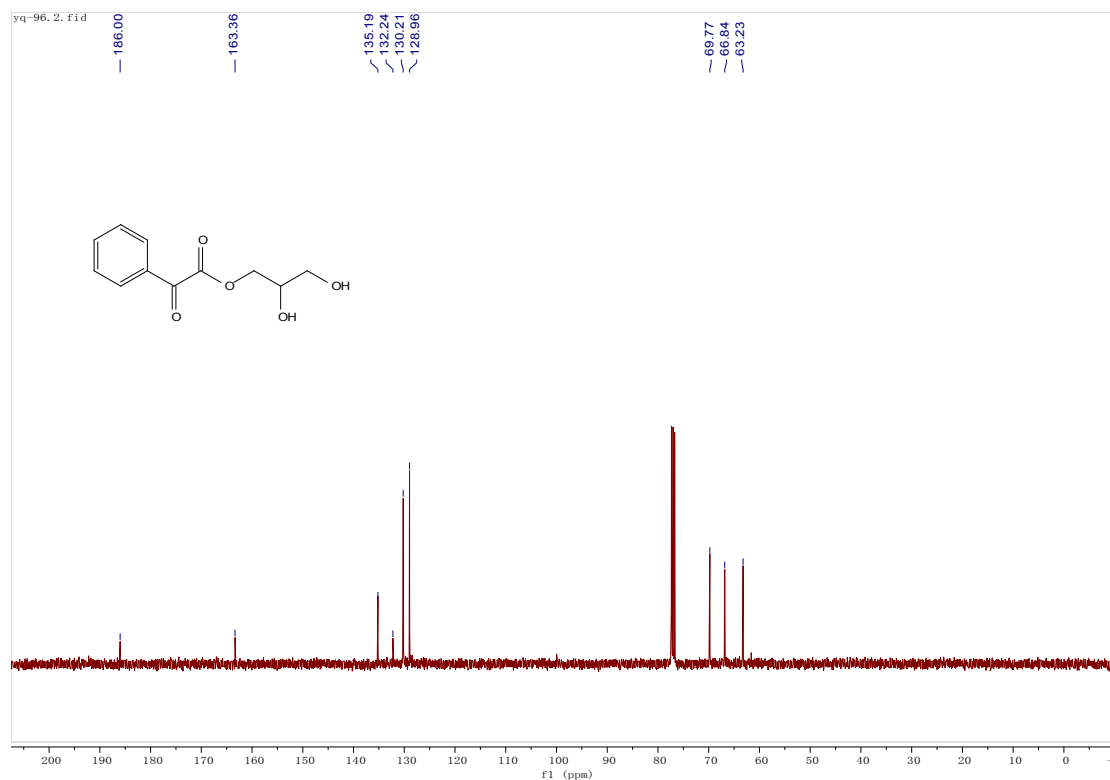

# $^1\text{H}$ and $^{13}\text{C}$ NMR spectra of **5a**

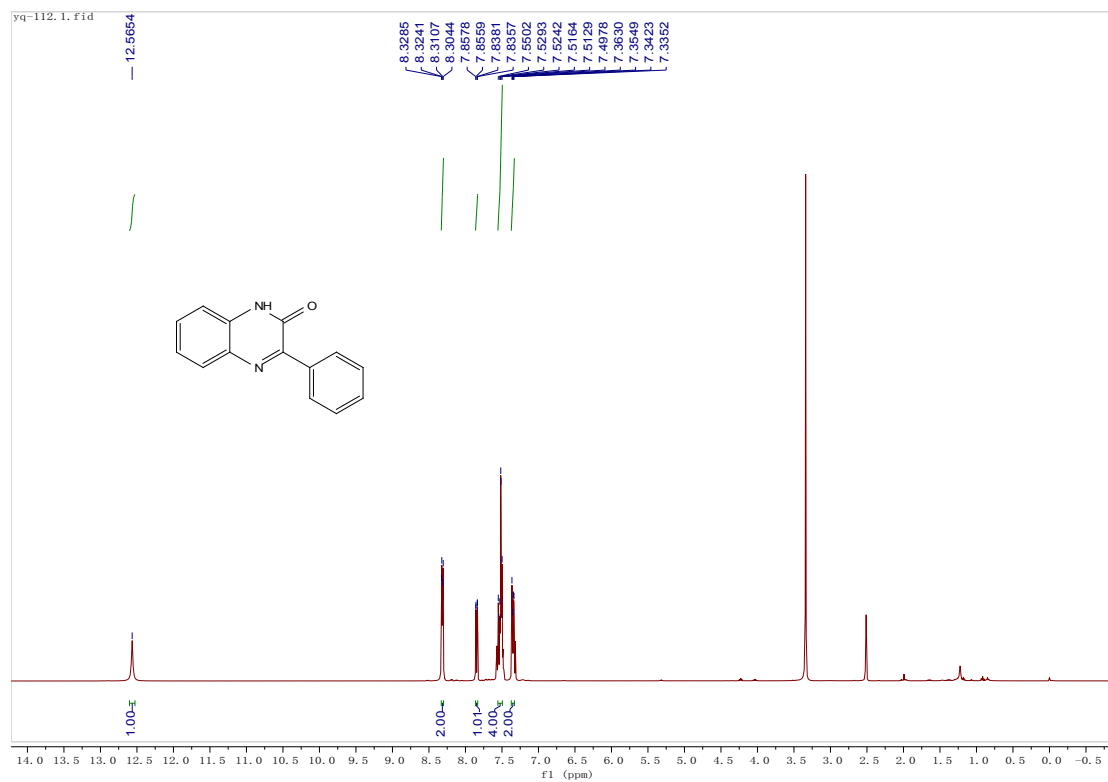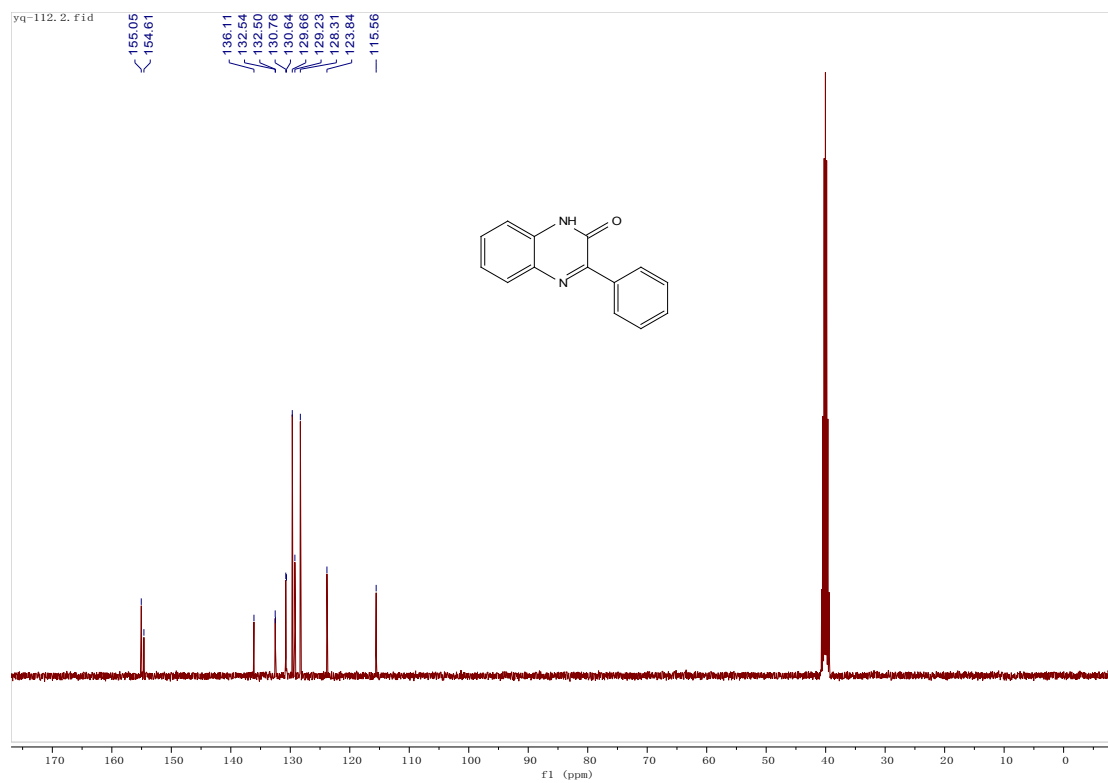



# <sup>1</sup>H and <sup>13</sup>C NMR spectra of **5b**

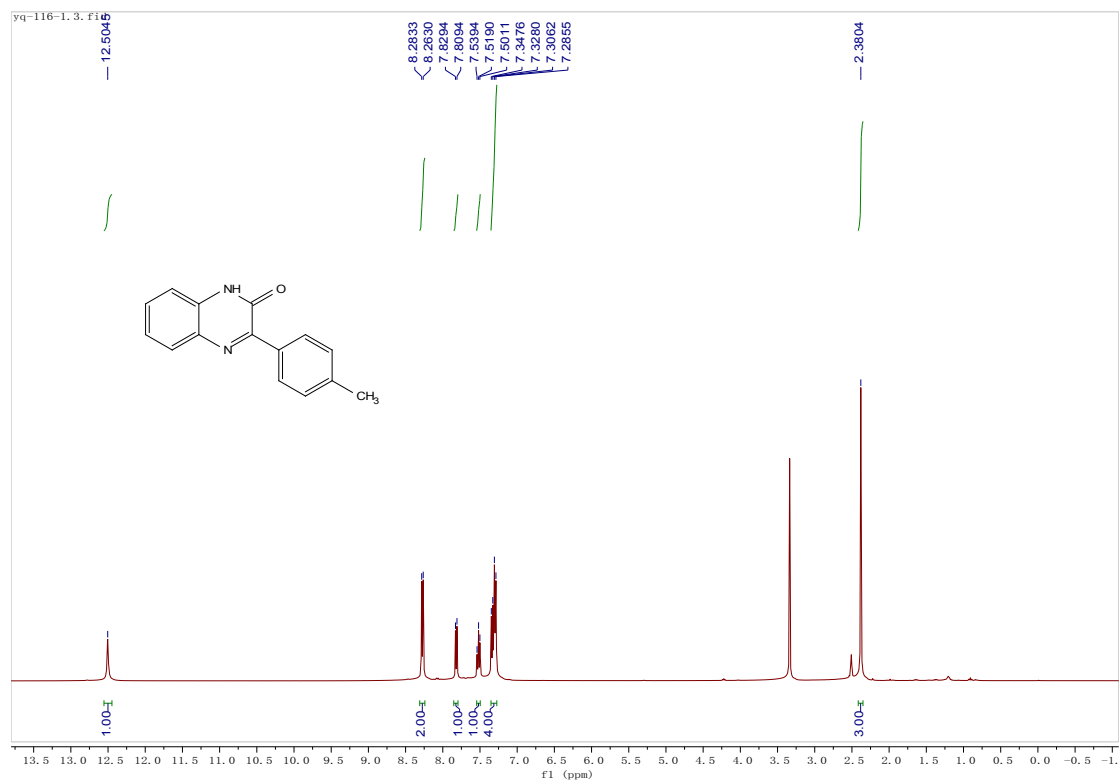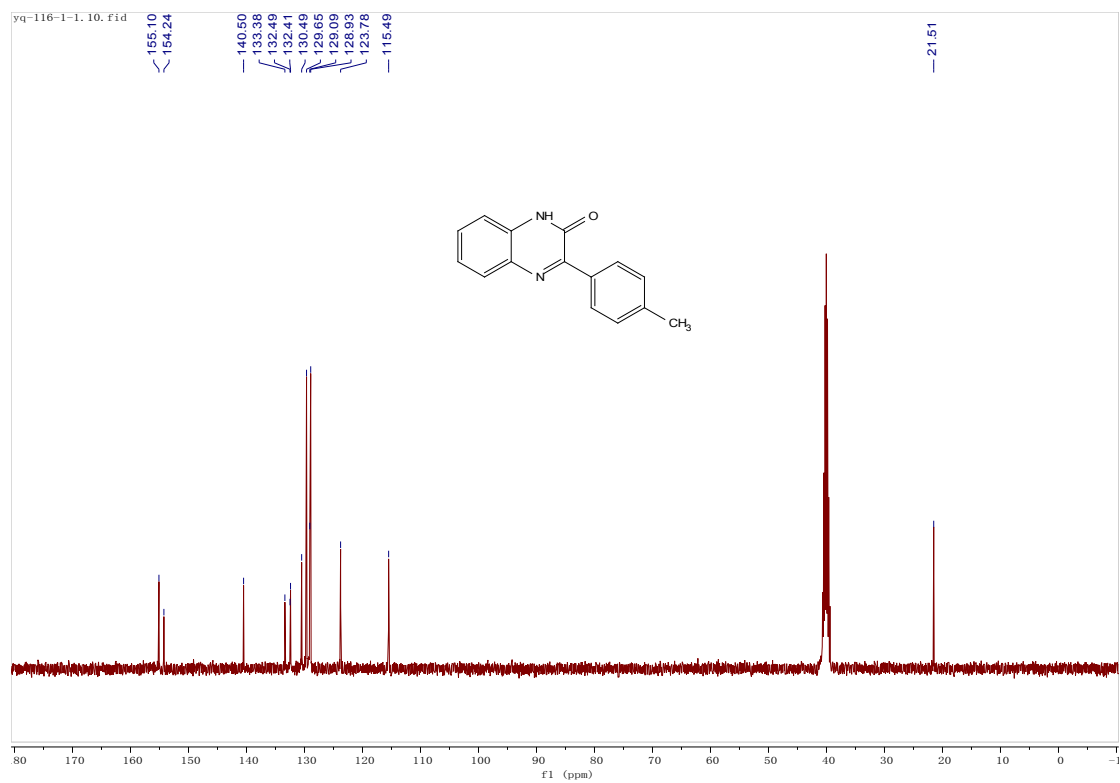

# $^1\text{H}$ and $^{13}\text{C}$ NMR spectra of **5c**

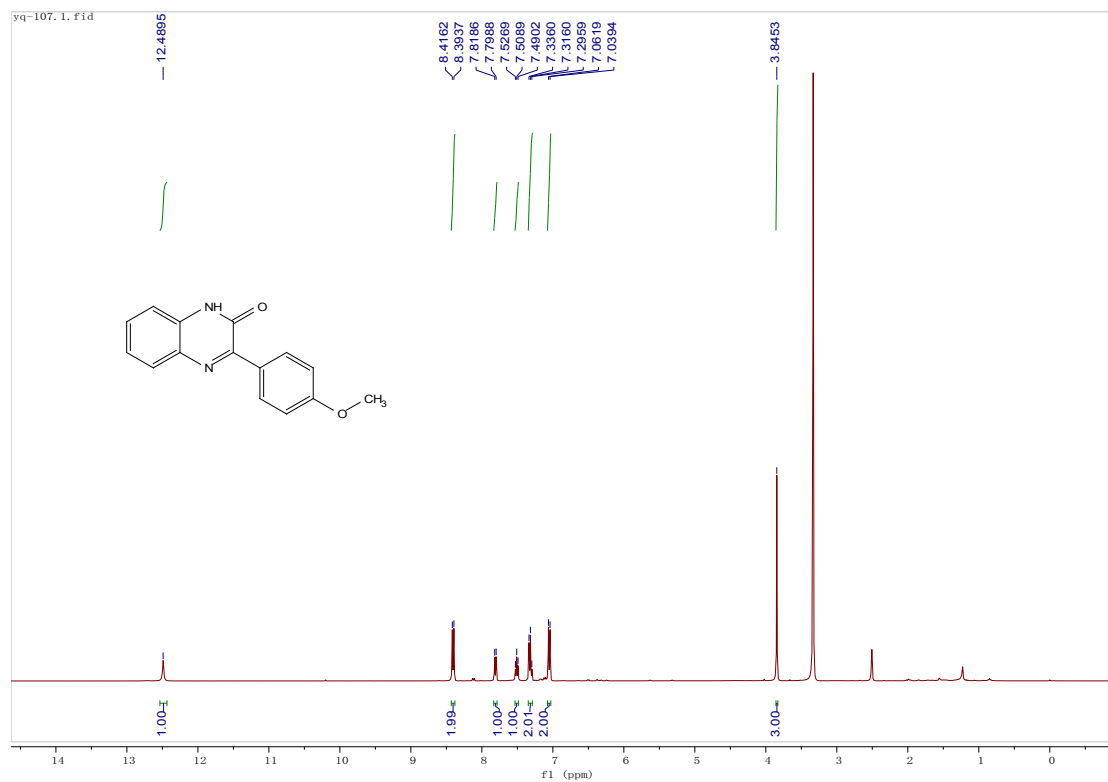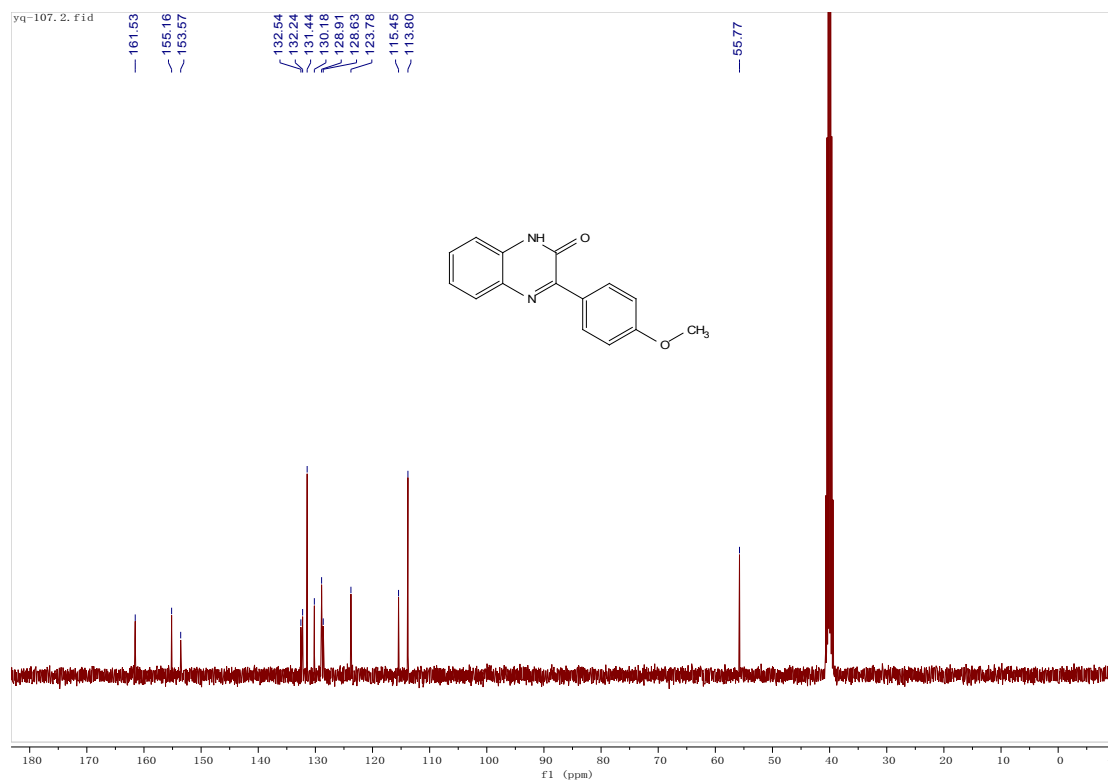

# $^1\text{H}$ and $^{13}\text{C}$ NMR spectra of **5d**

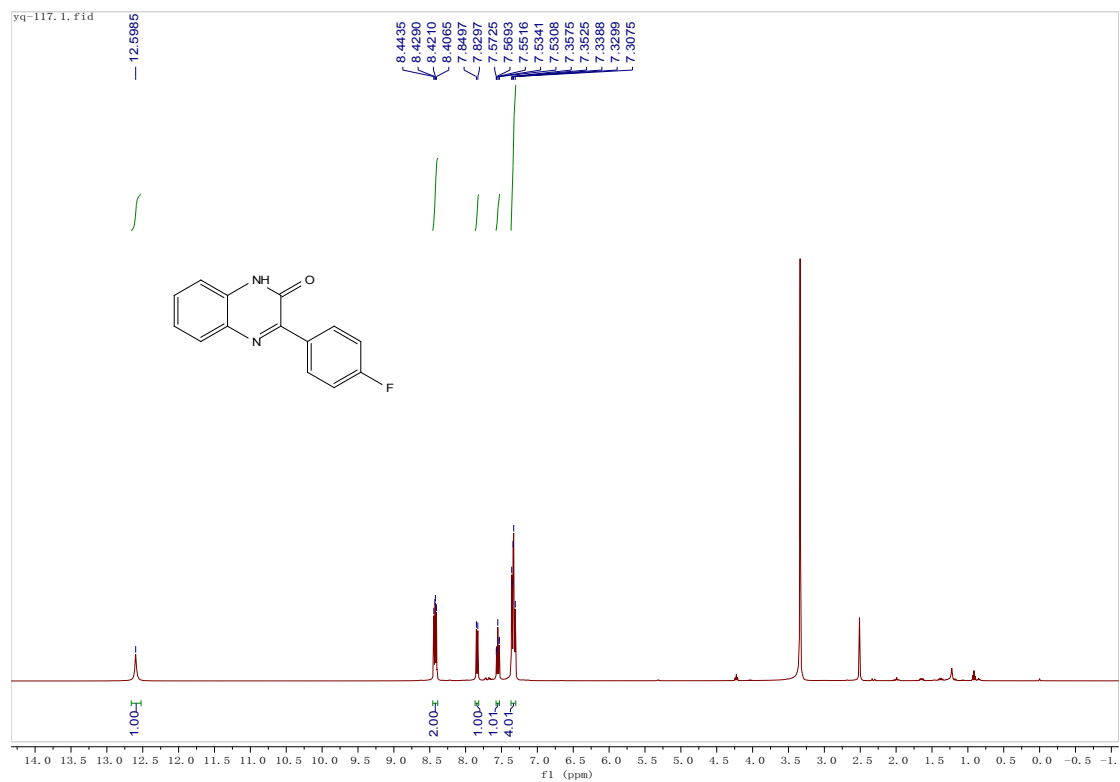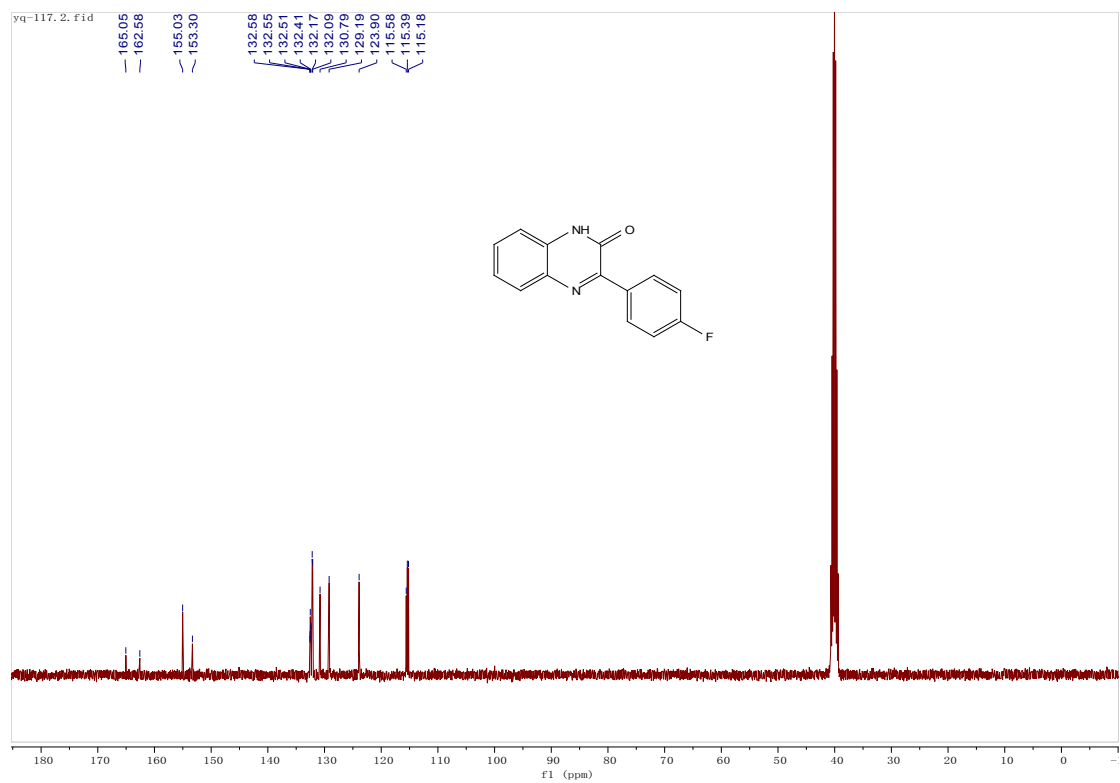

# $^1\text{H}$ and $^{13}\text{C}$ NMR spectra of **5e**

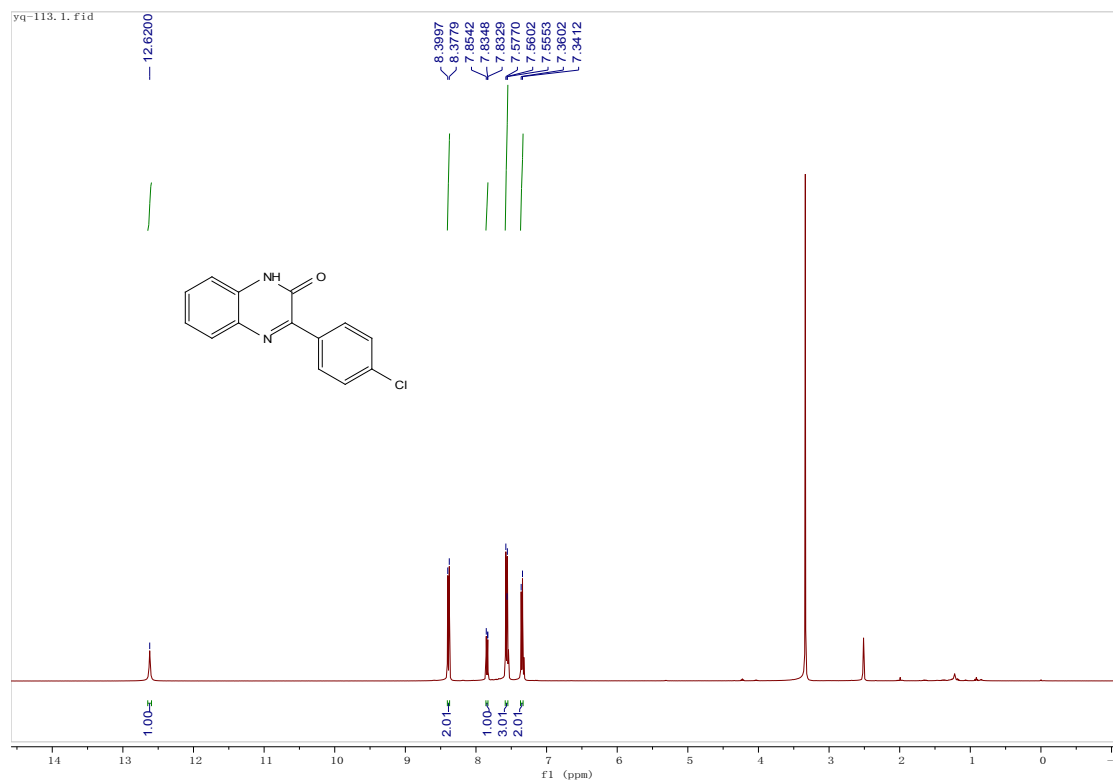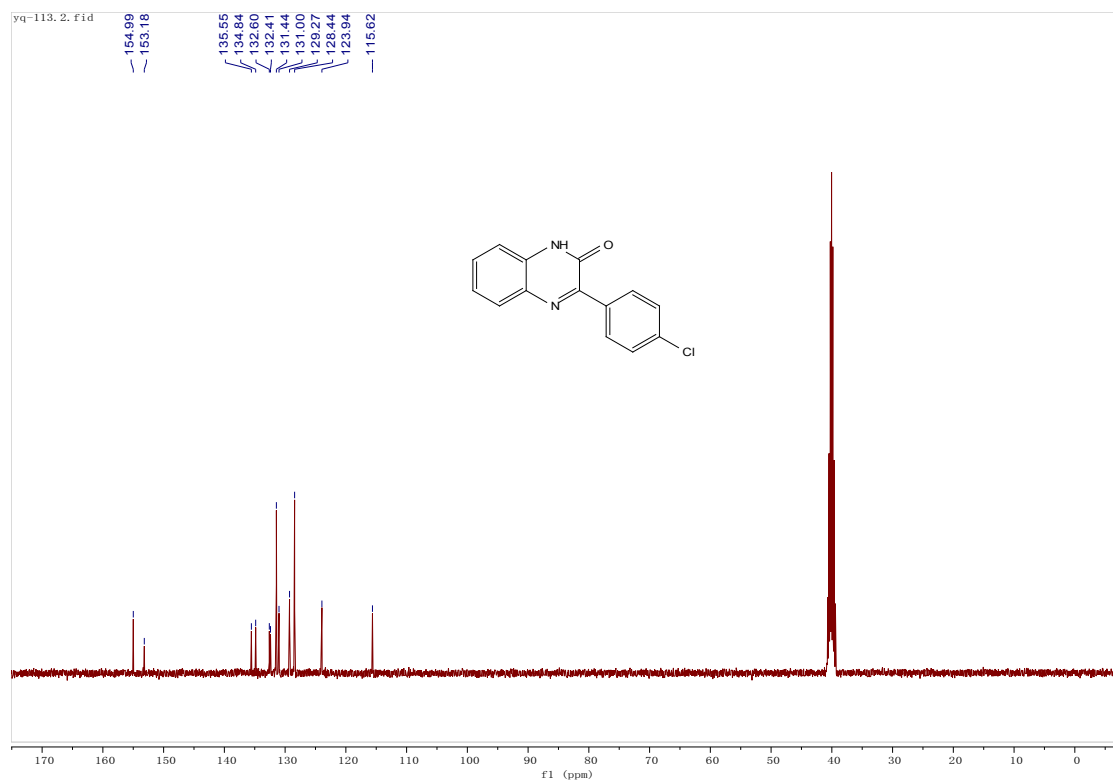

# $^1\text{H}$ and $^{13}\text{C}$ NMR spectra of **5f**

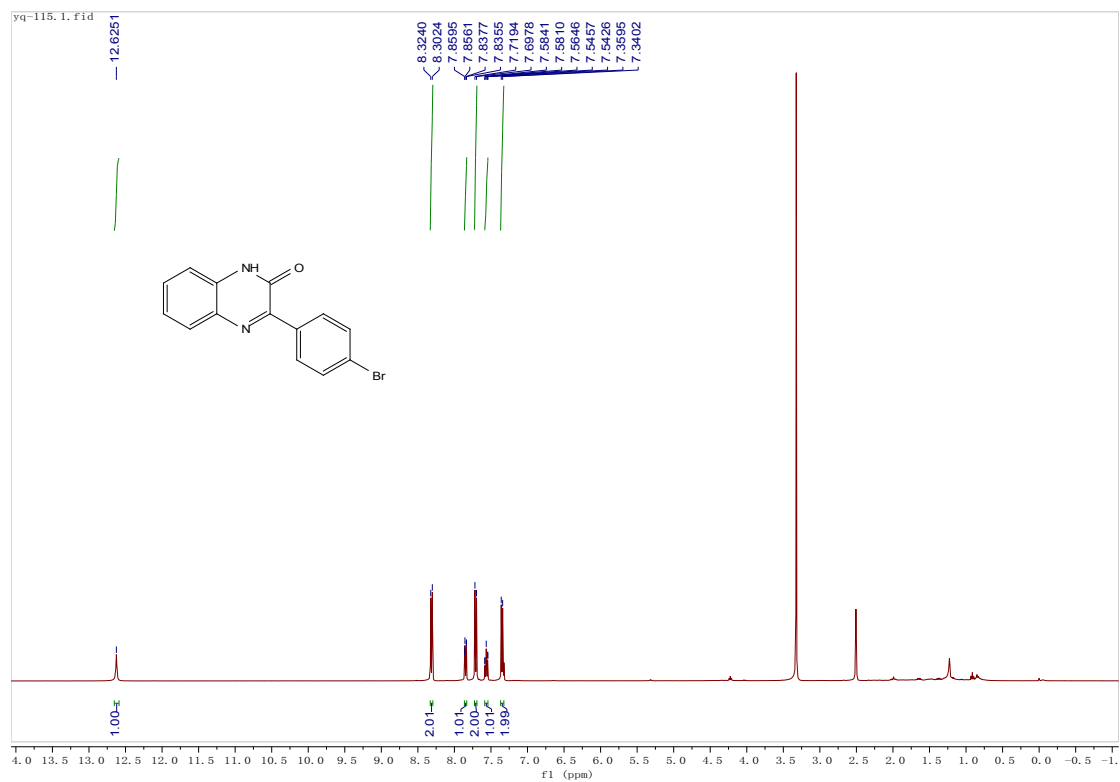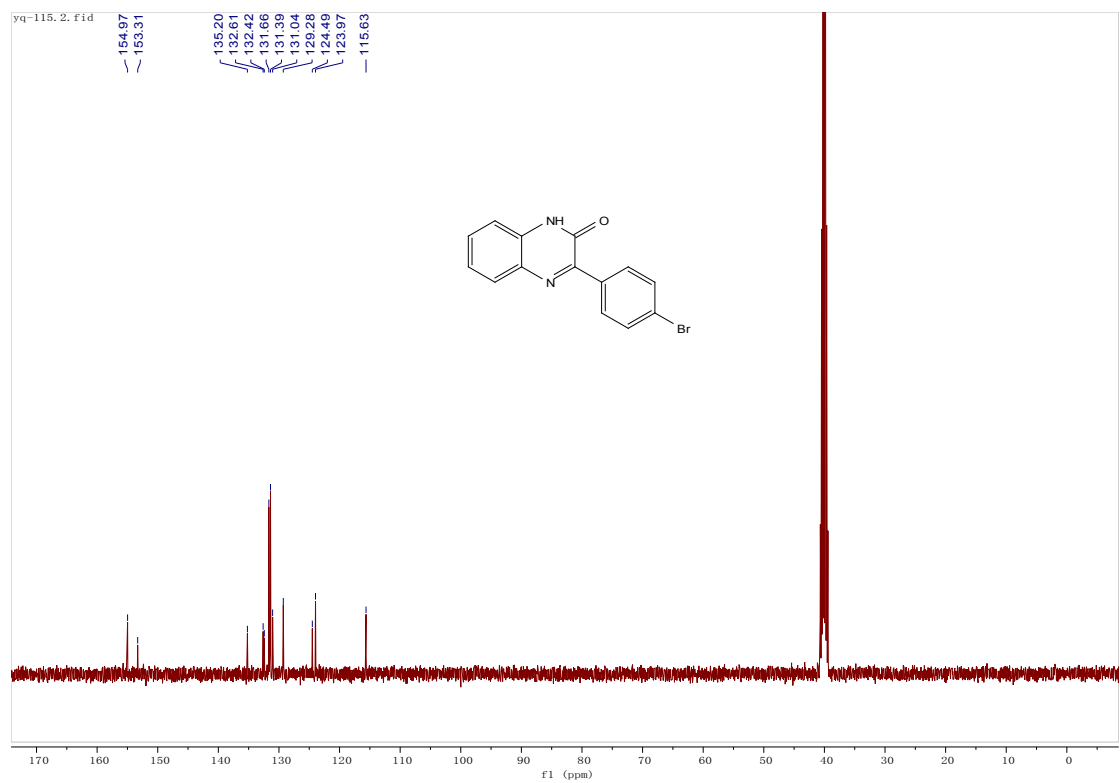

# <sup>1</sup>H and <sup>13</sup>C NMR spectra of 5g

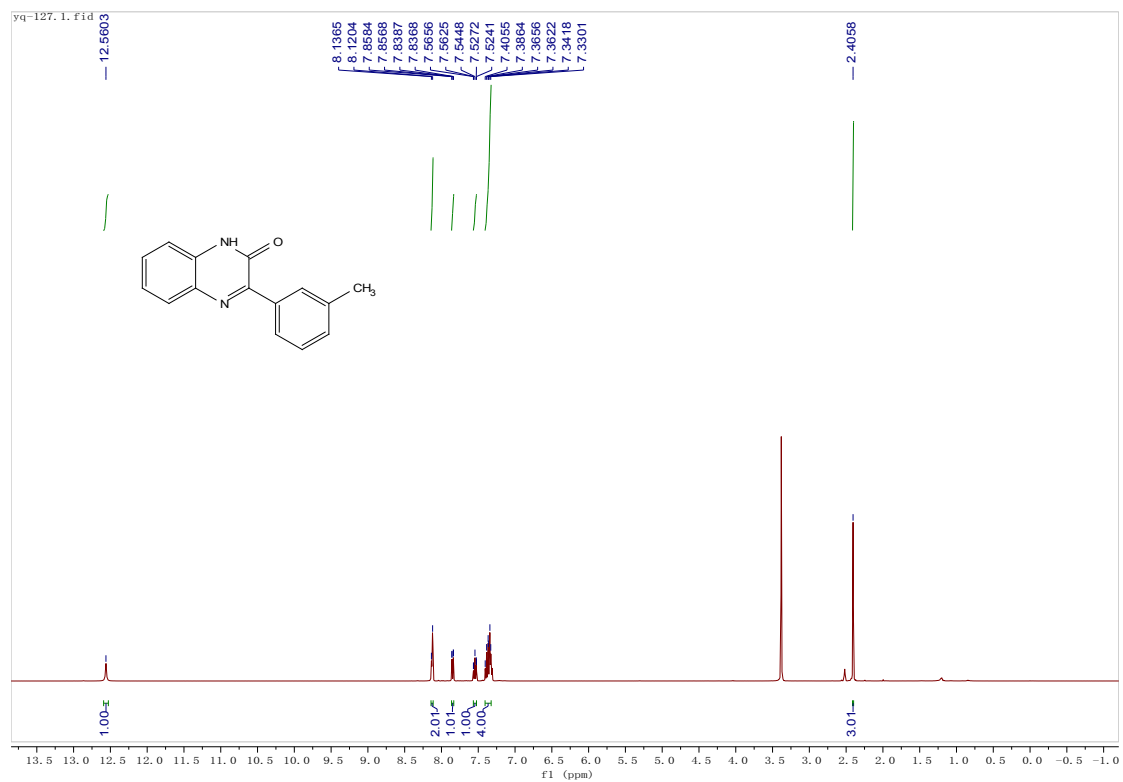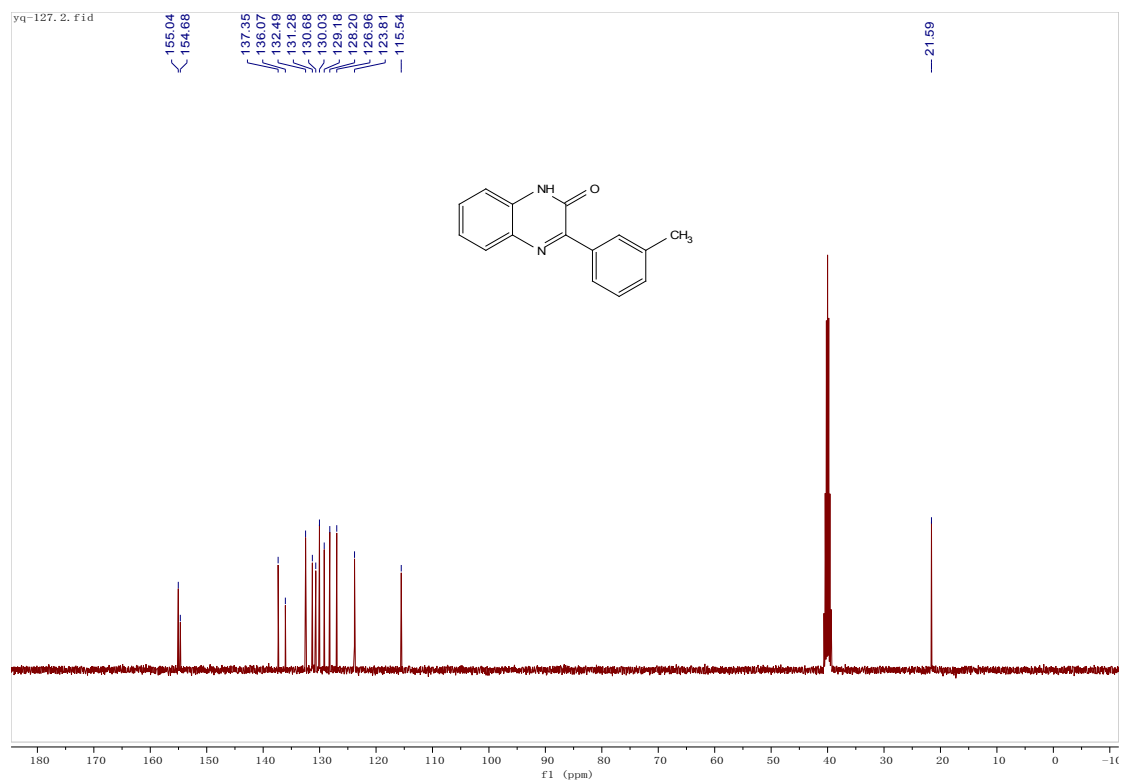

# $^1\text{H}$ and $^{13}\text{C}$ NMR spectra of **5h**

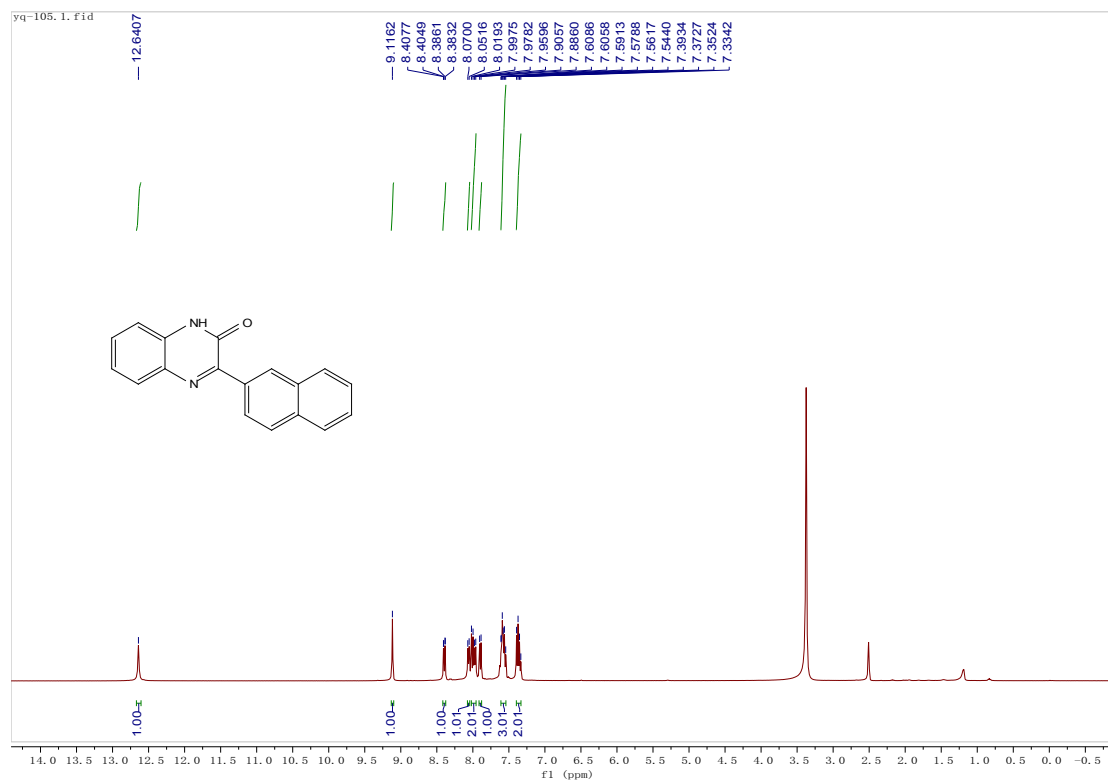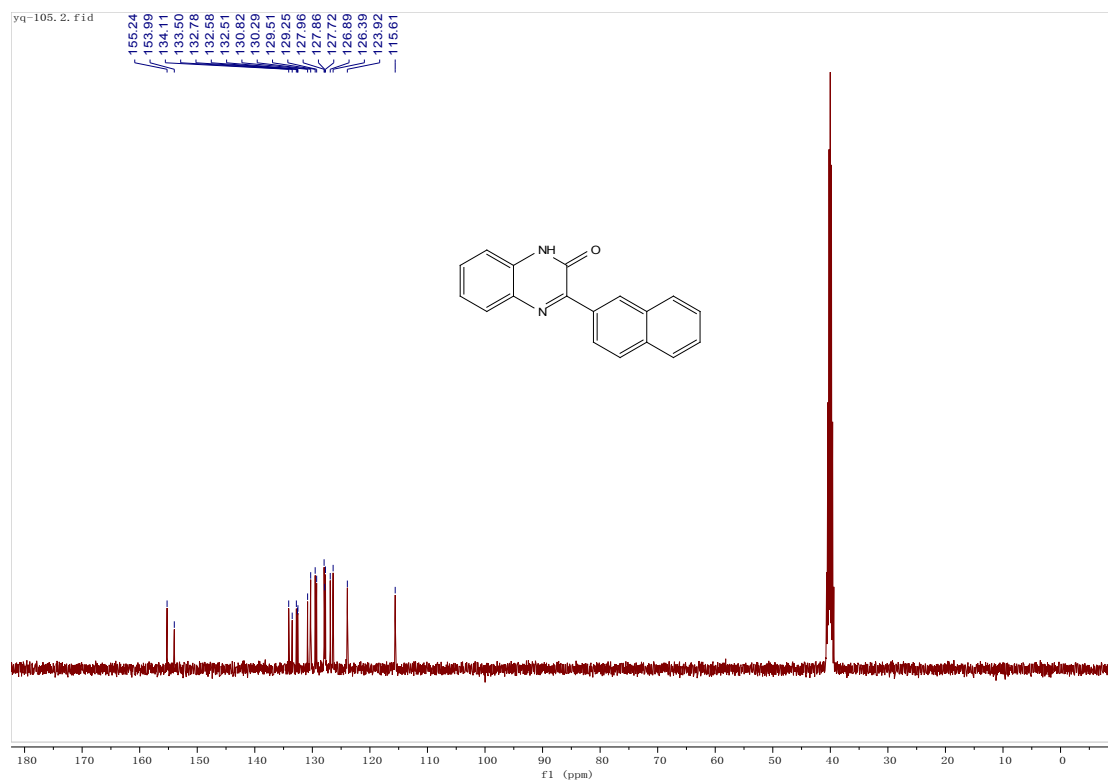

# $^1\text{H}$ and $^{13}\text{C}$ NMR spectra of **5i**

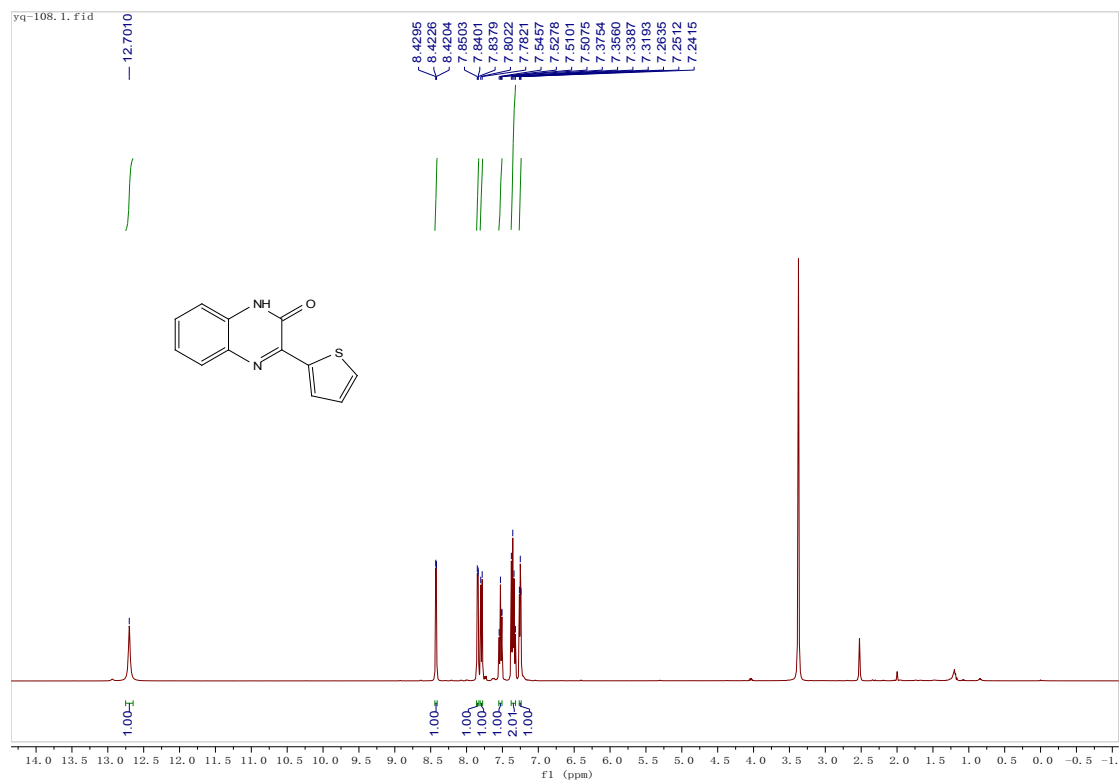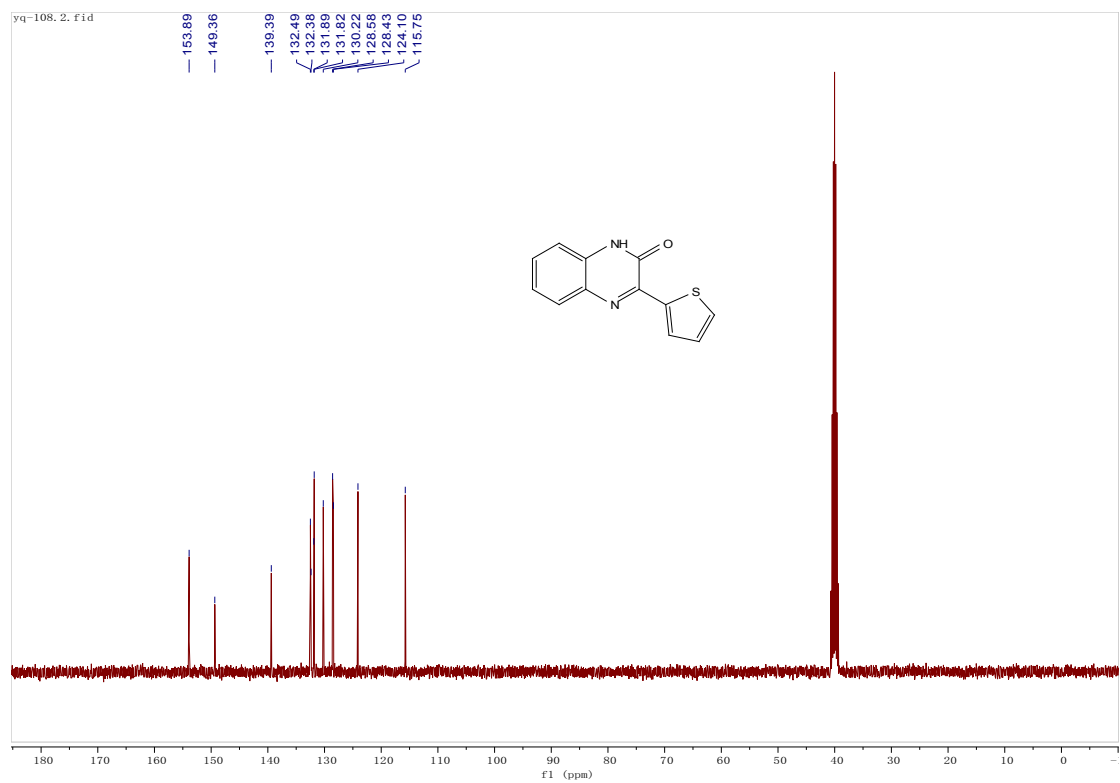

Supplement: c9gc01357a1.pdf [file c9gc01357a1.pdf]
